# Supplementary material for: Multi Component Reactions under Increased Pressure: On the Mechanism of Formation of Pyridazino[5,4,3-de][1,6]naphthyridine Derivatives by the Reaction of Malononitrile, Aldehydes and 2-Oxoglyoxalarylhydrazones in Q-Tubes
Source: MDPI journal article supplement (doi:10.3390/molecules22122114), 2017-12-01

## **(Supplementary material)**

**Multi component reactions under increased pressure: On the mechanism of formation of pyridazino[5,4,3-de][1,6]naphthyridine derivatives from reaction of malononitrile, aldehyde and 2-oxoglyoxalarylhydrazones in Q-tubes**

**Majdah A. AL-Johani <sup>1</sup>, Khadijah M. Al-Zaydi <sup>1\*</sup>, Sameera M. Mousally <sup>1</sup>, Norah F. Alqahtani <sup>1</sup>, Noha Hilmy Elnagdi <sup>2</sup>, Mohamed H. Elnagdi <sup>3</sup>**

Compound 12a

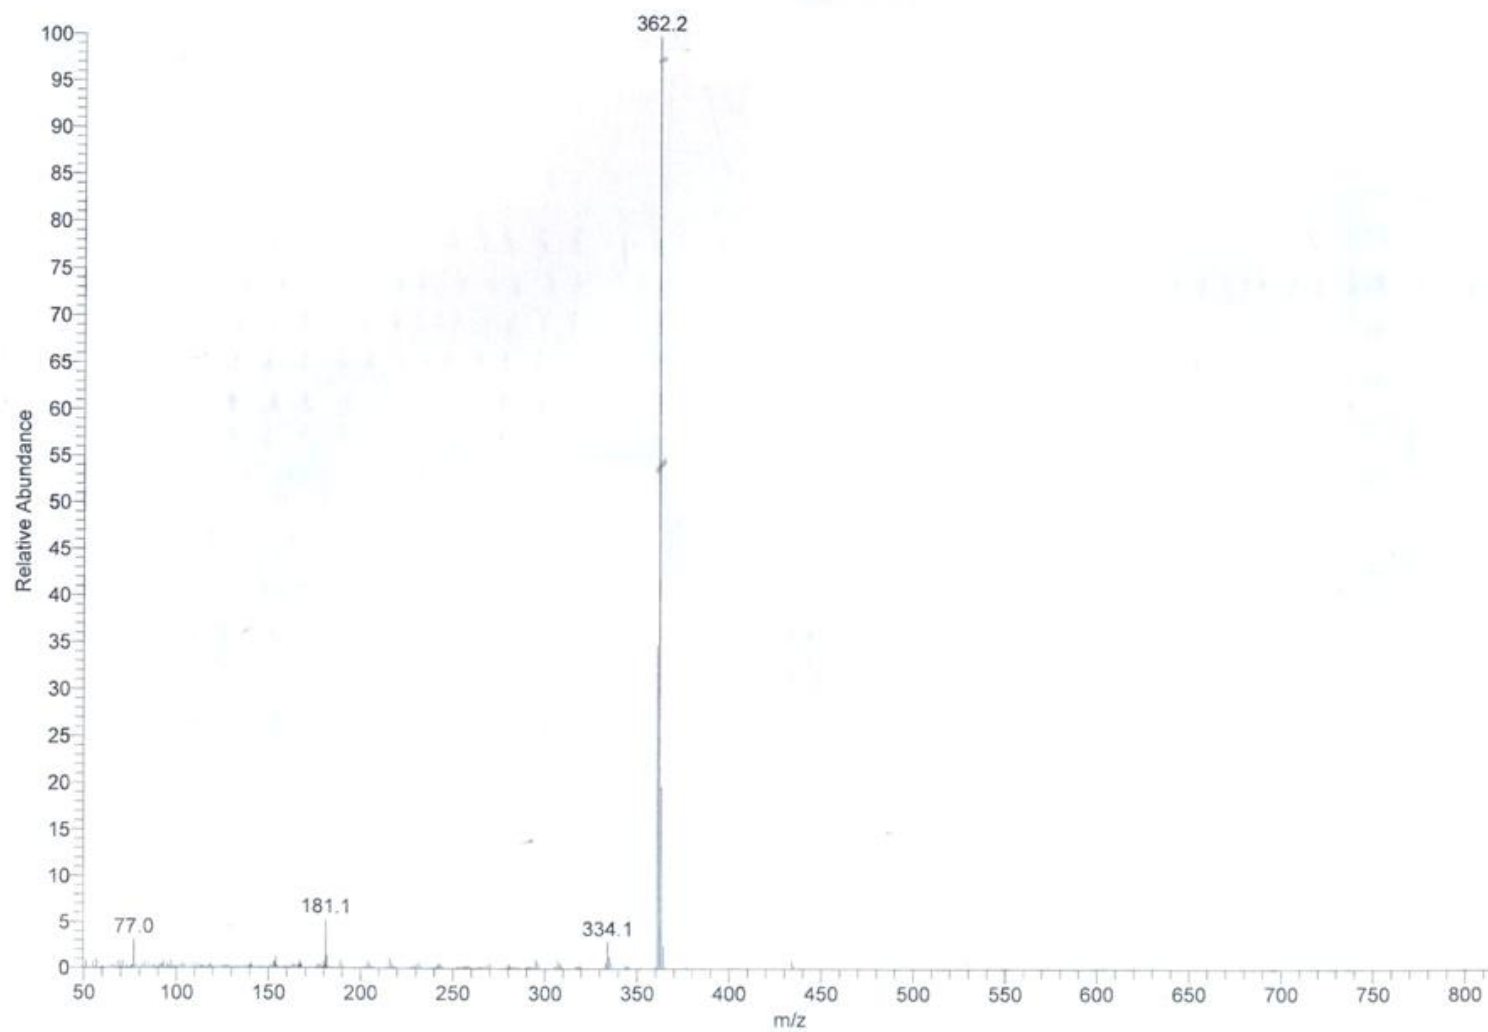

Compound 12a

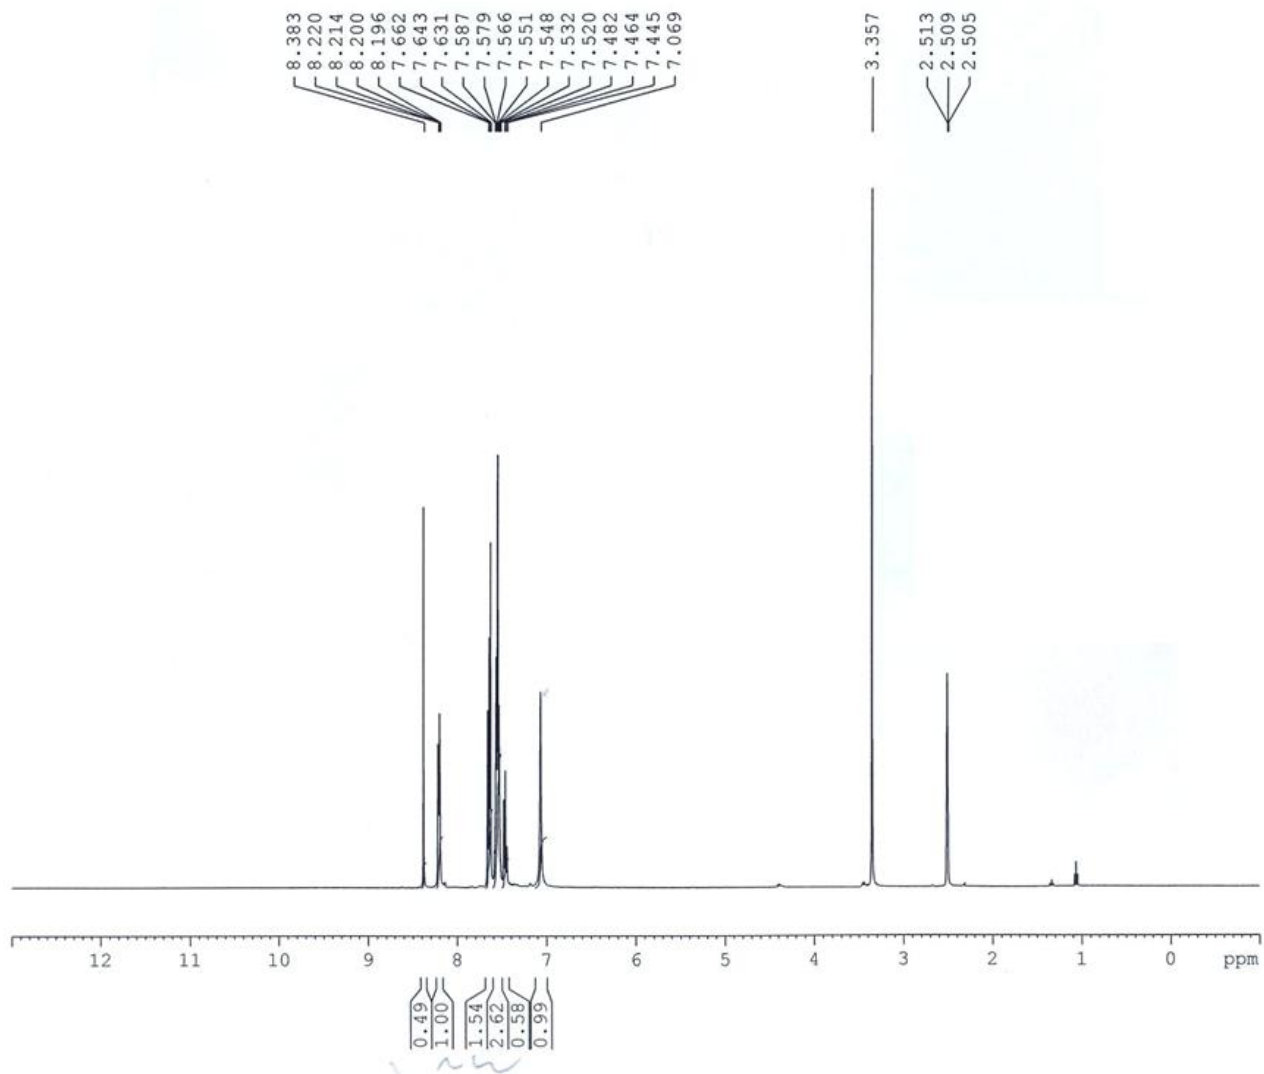

Compound 12a

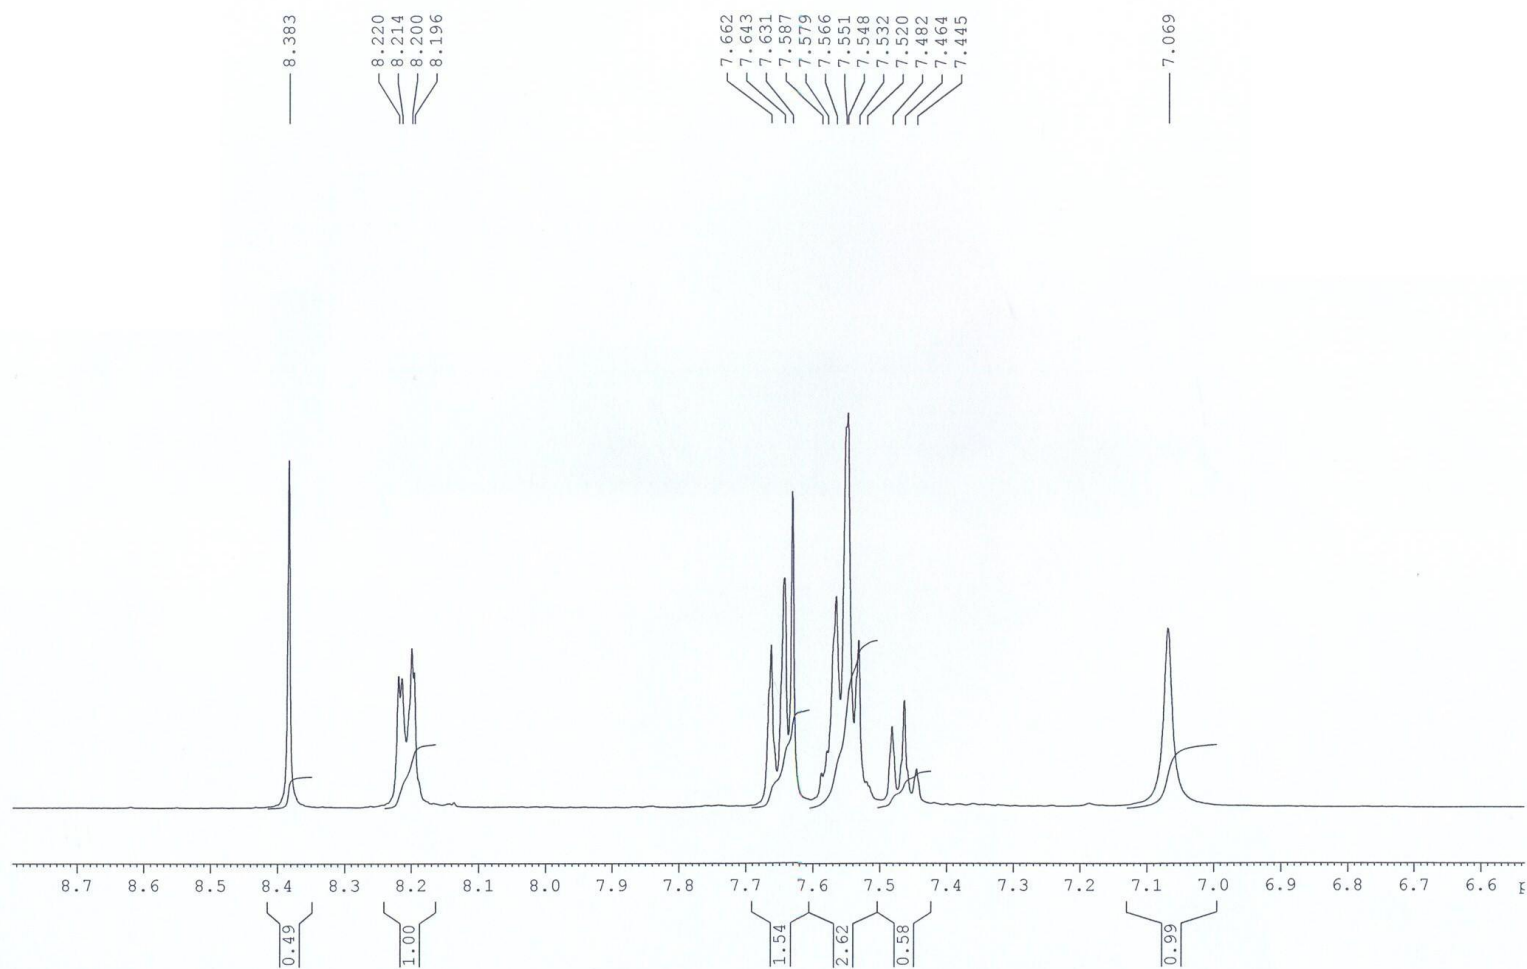



Compound 12a

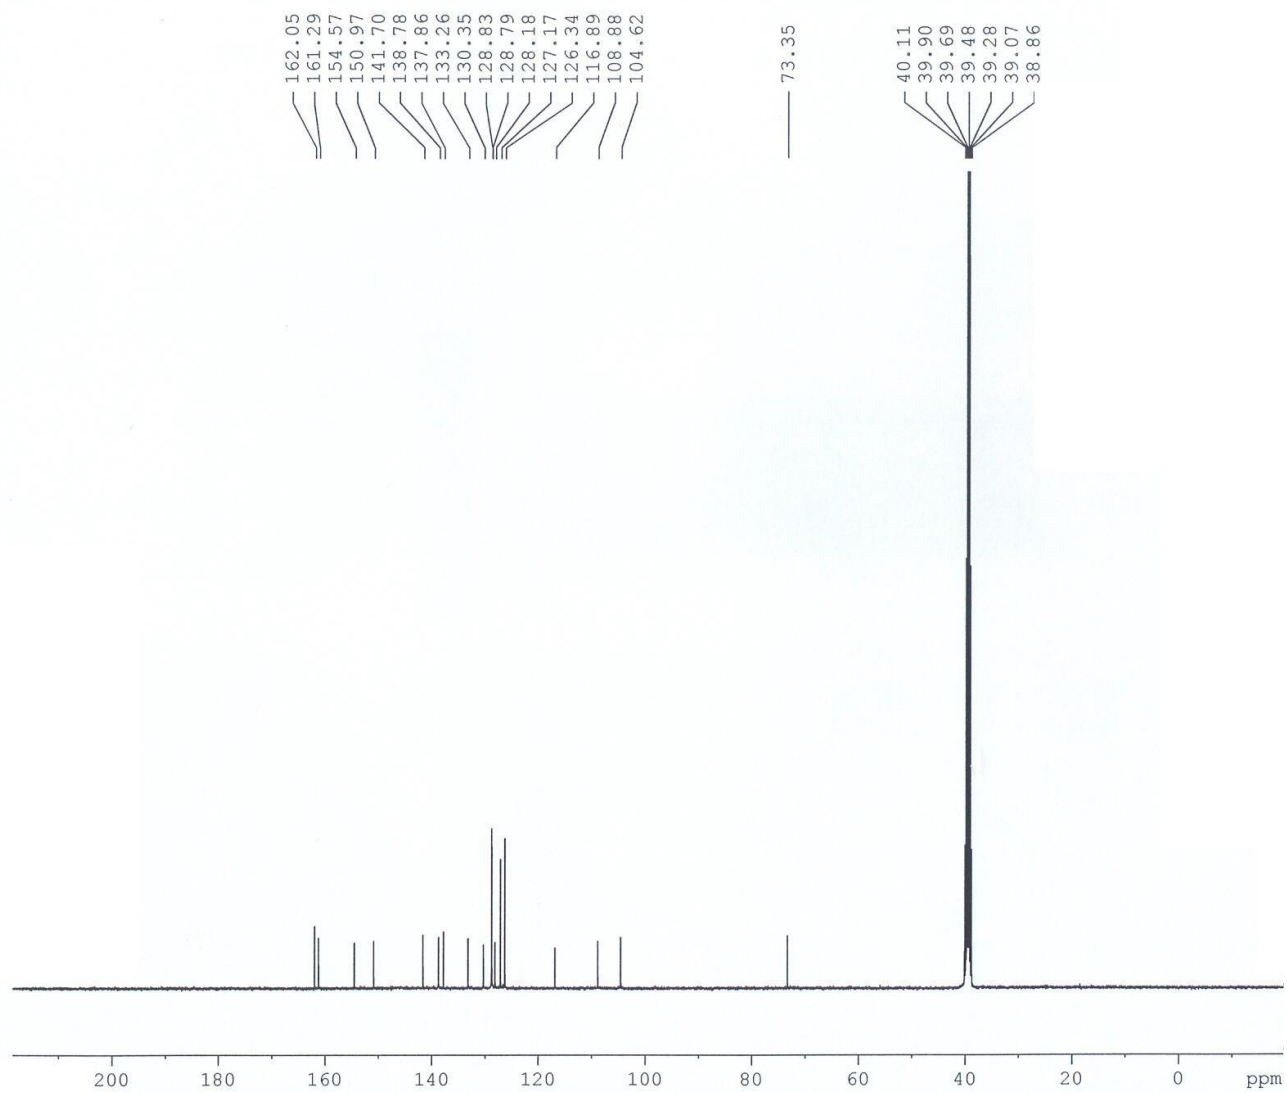

Compound 12a

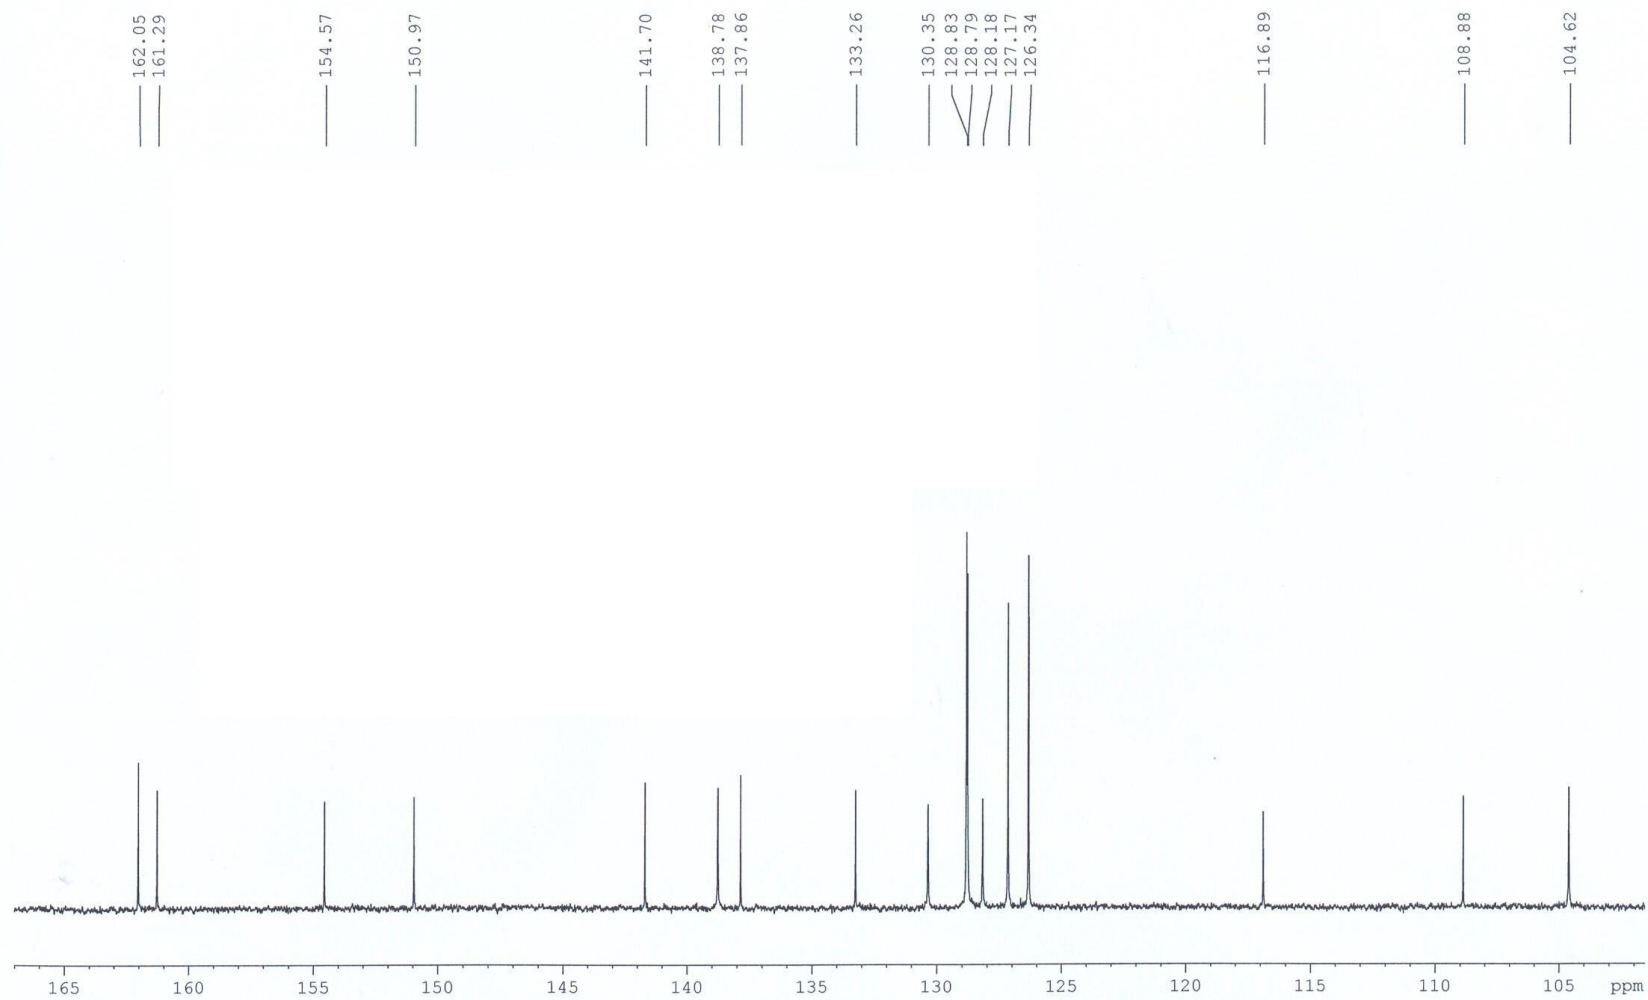

Compound 12a

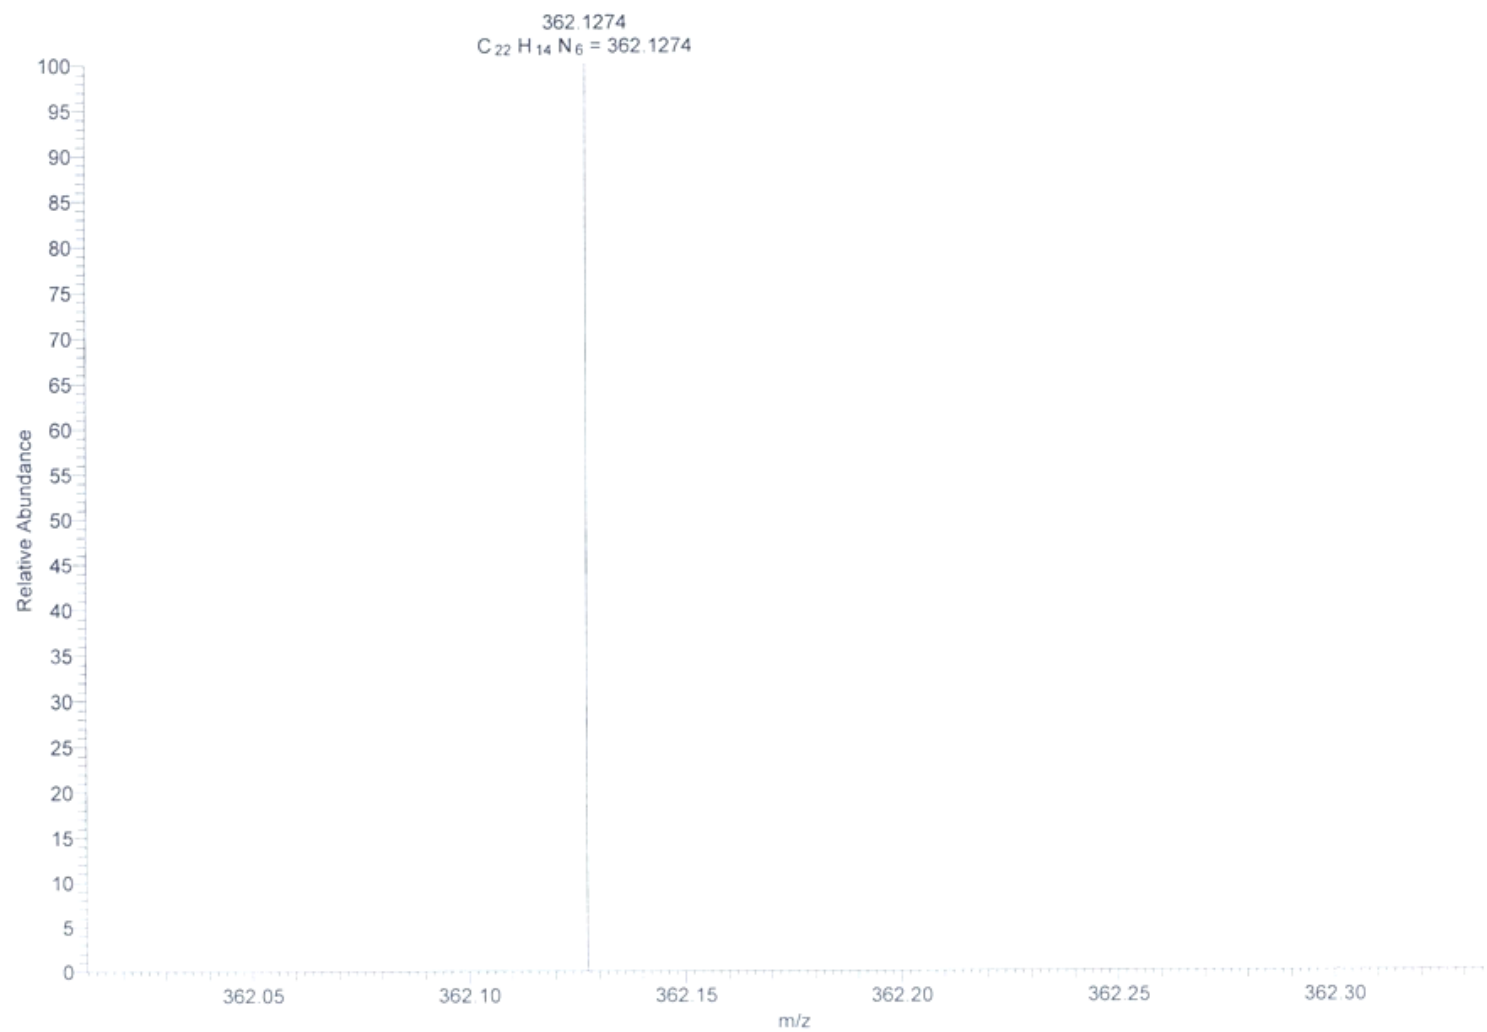

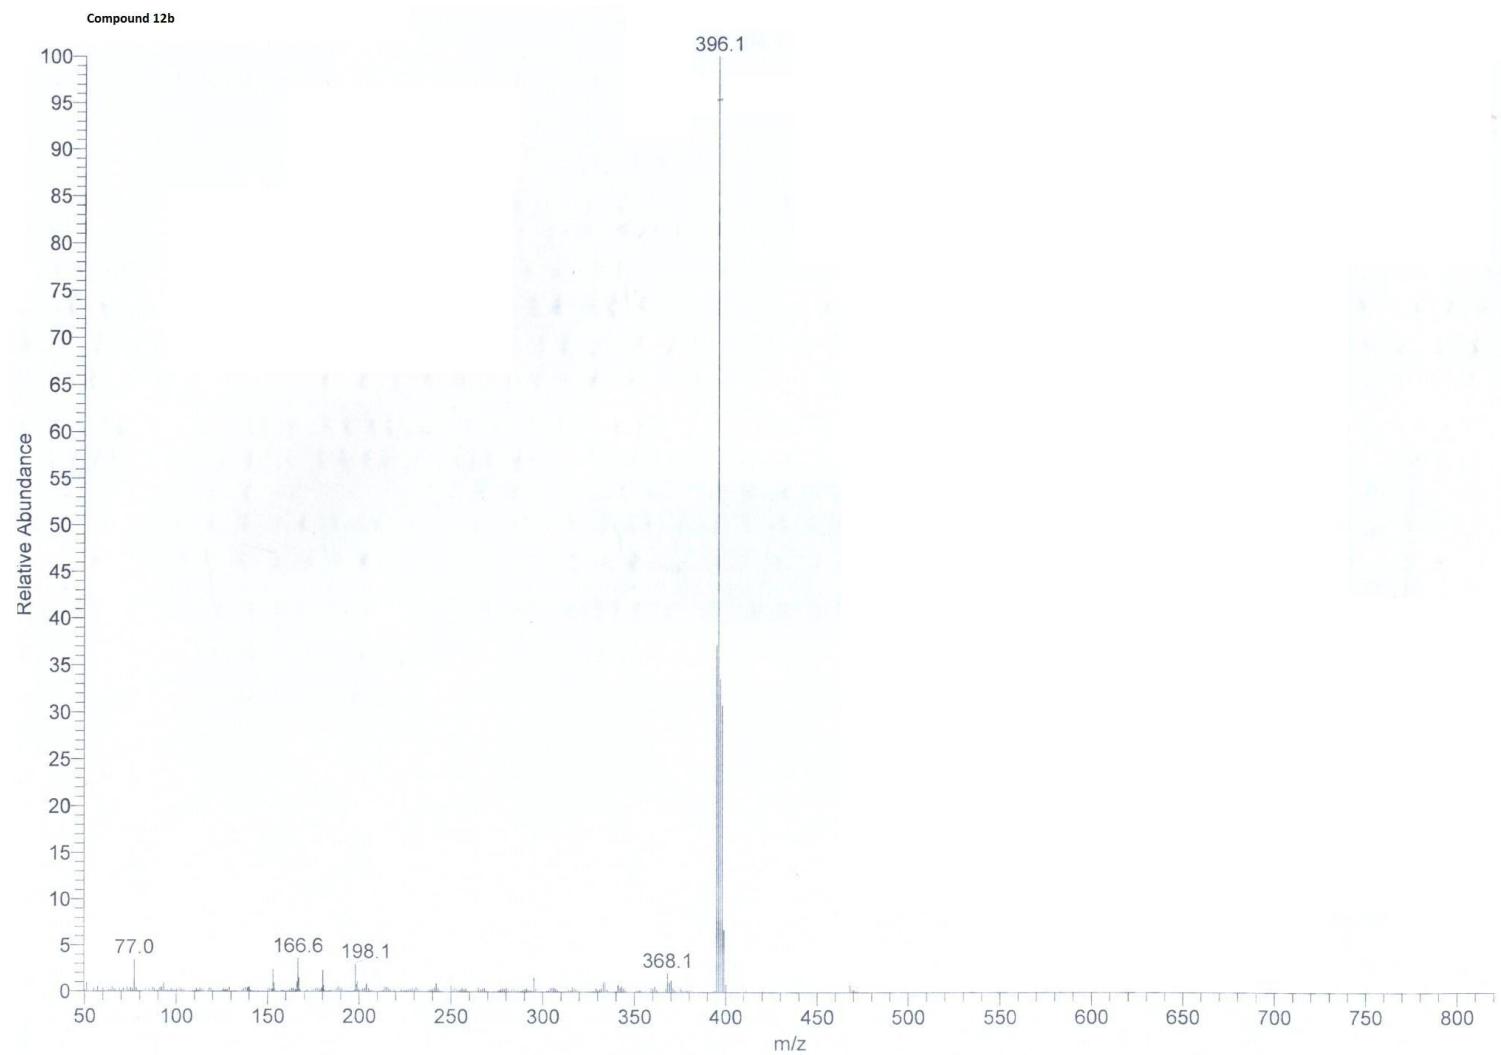

Compound 12b

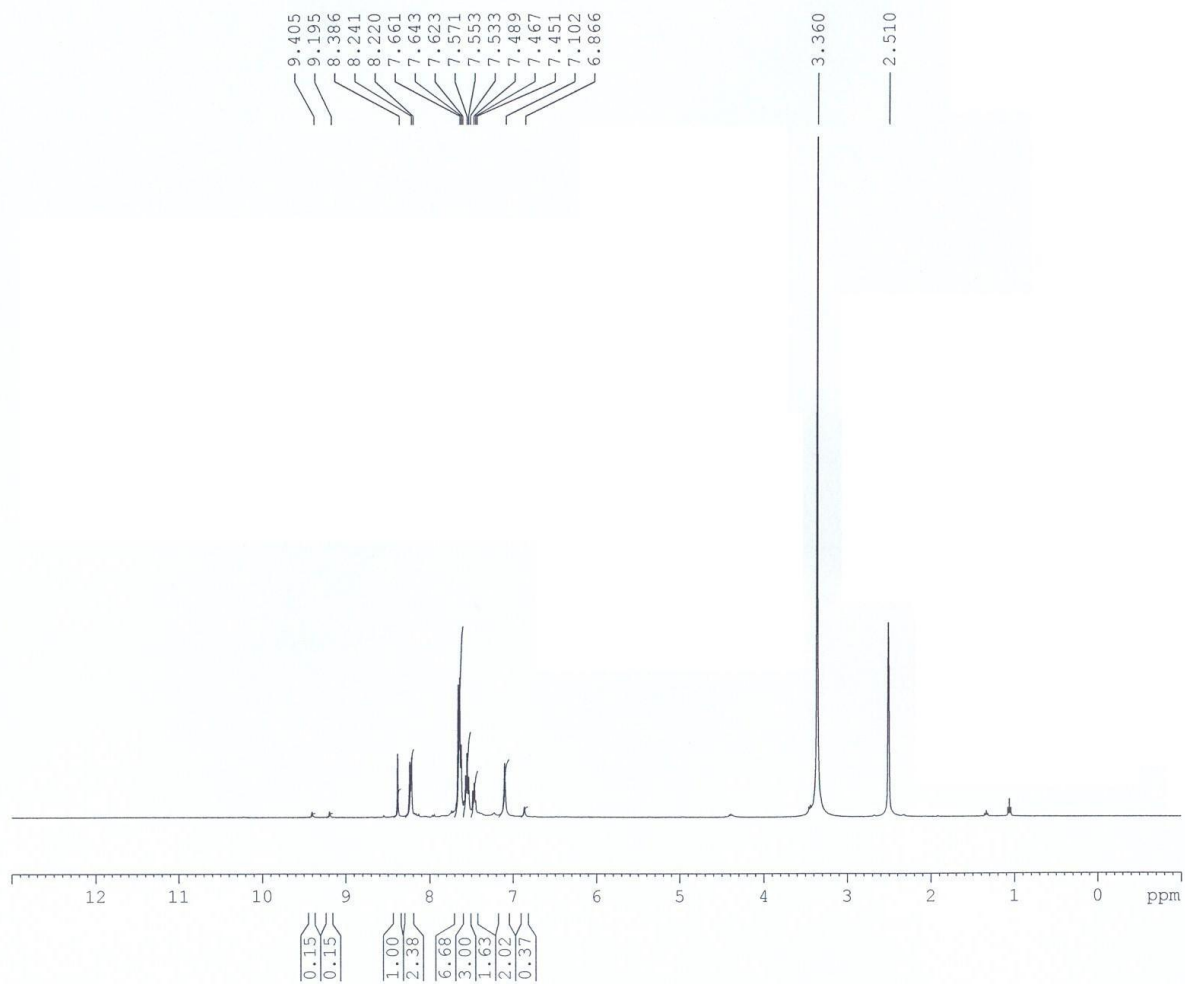

Compound 12b

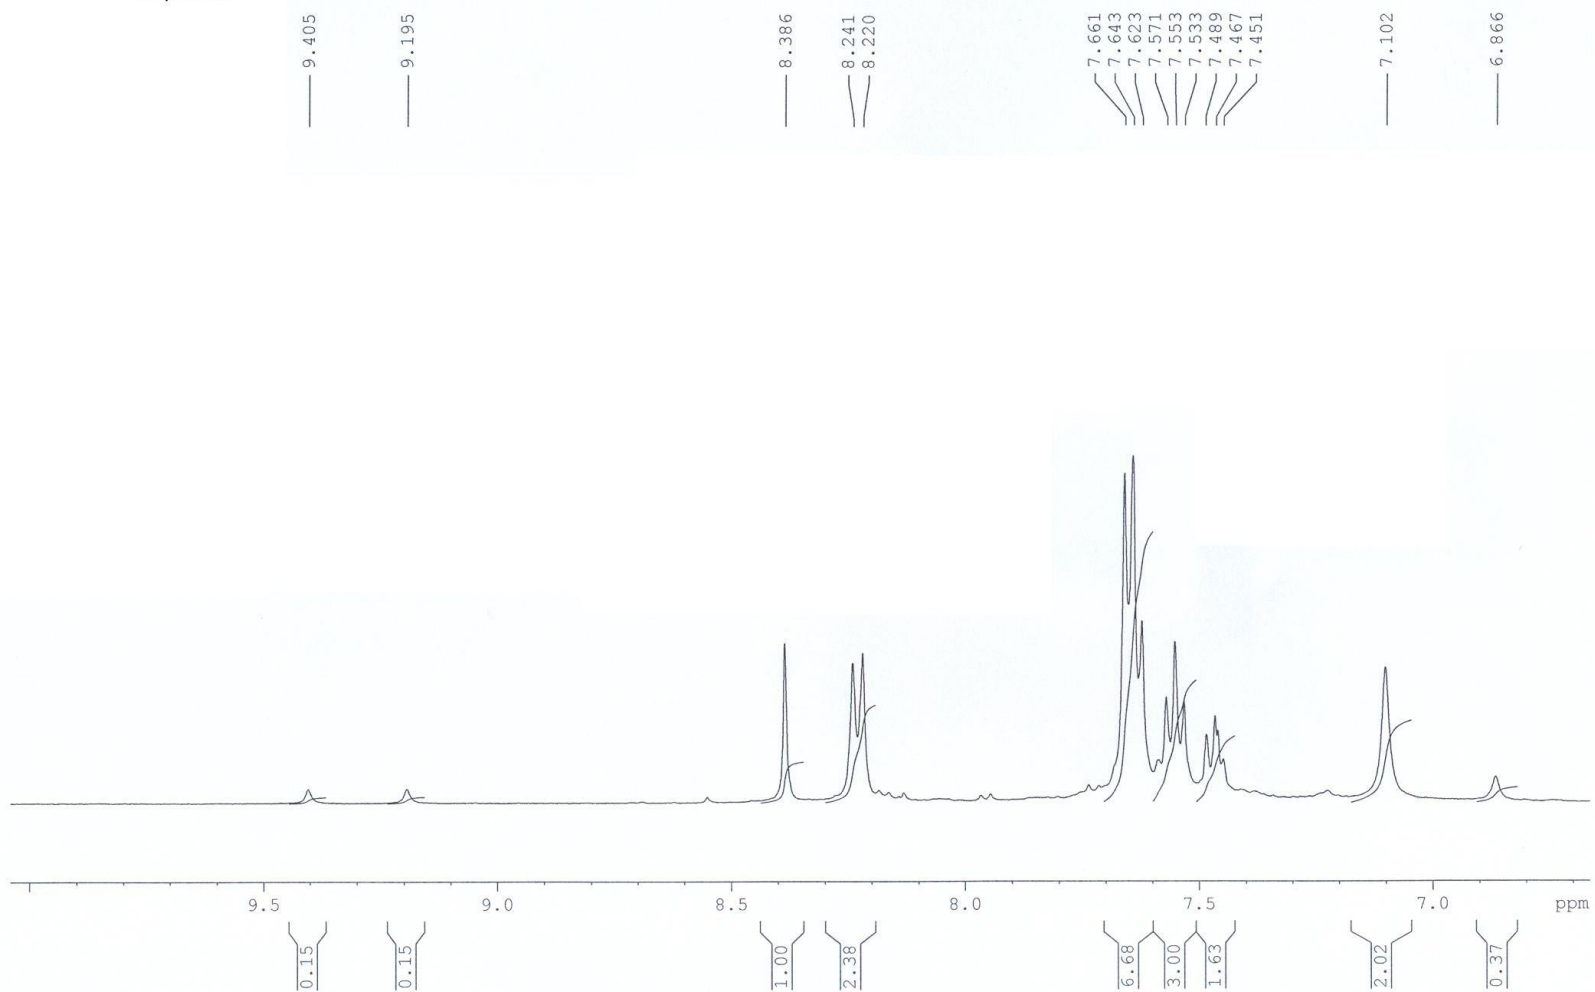

Compound 12b

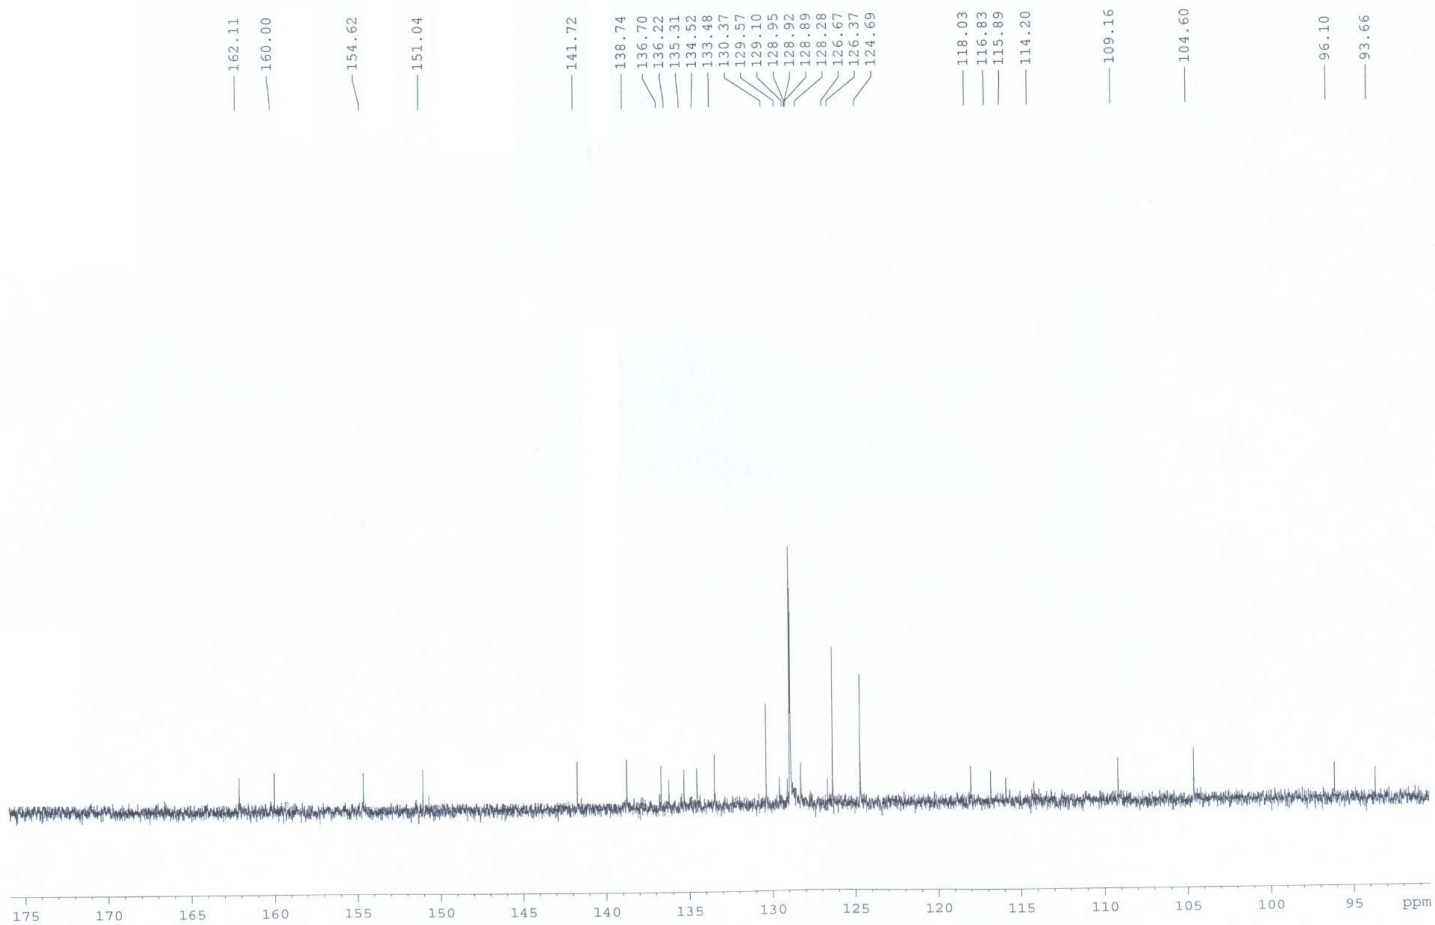

Compound 12b

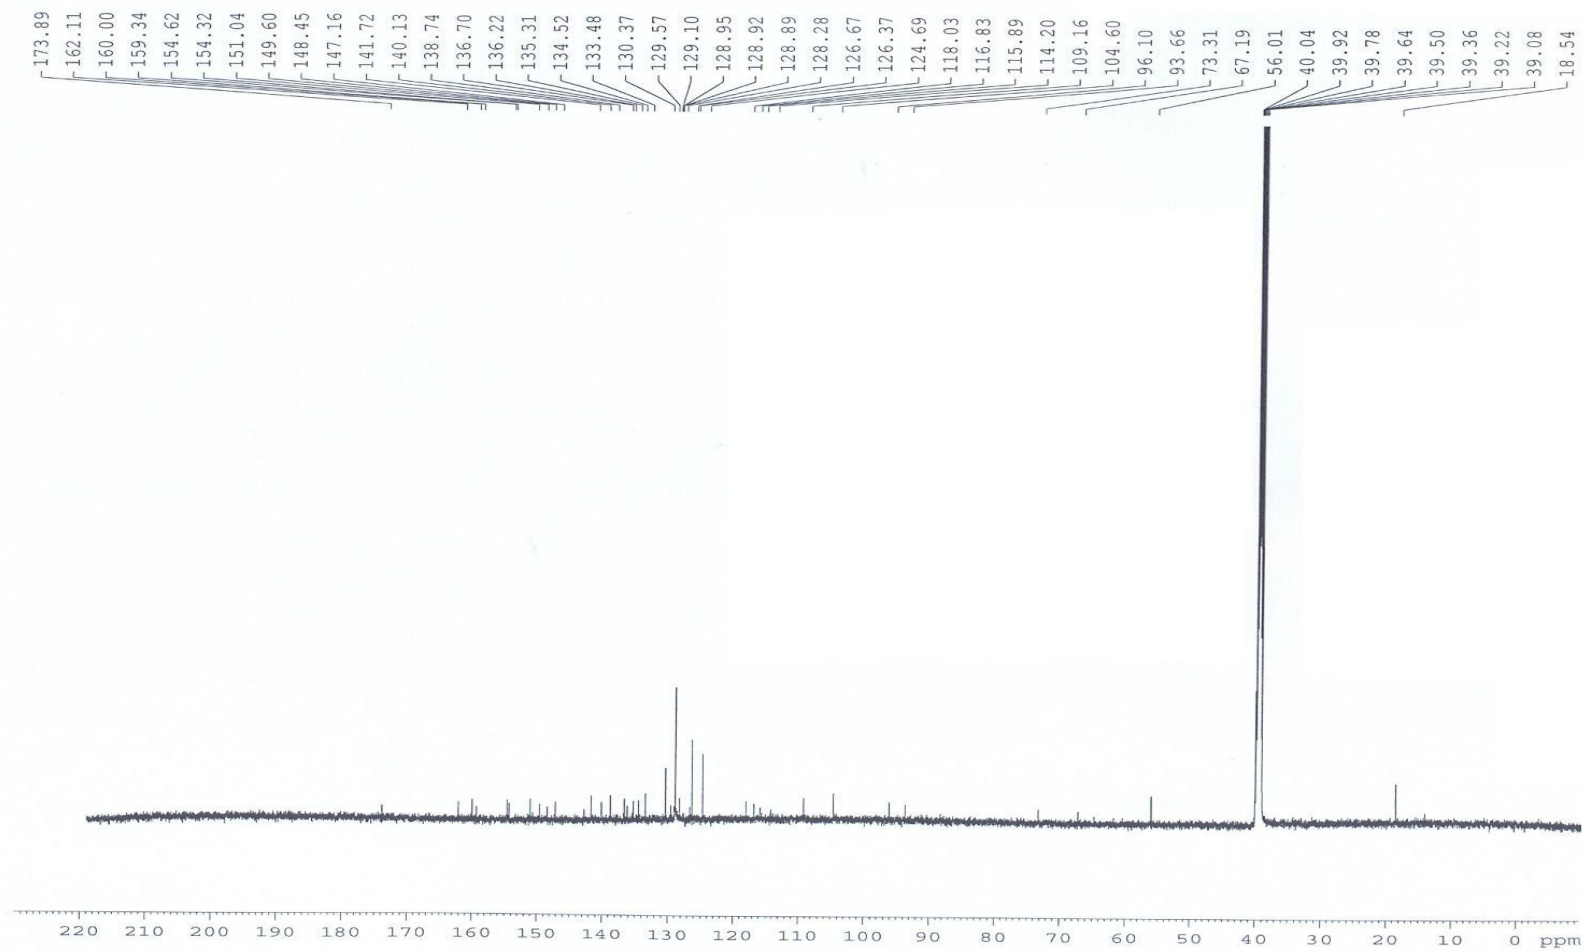



Compound 12b

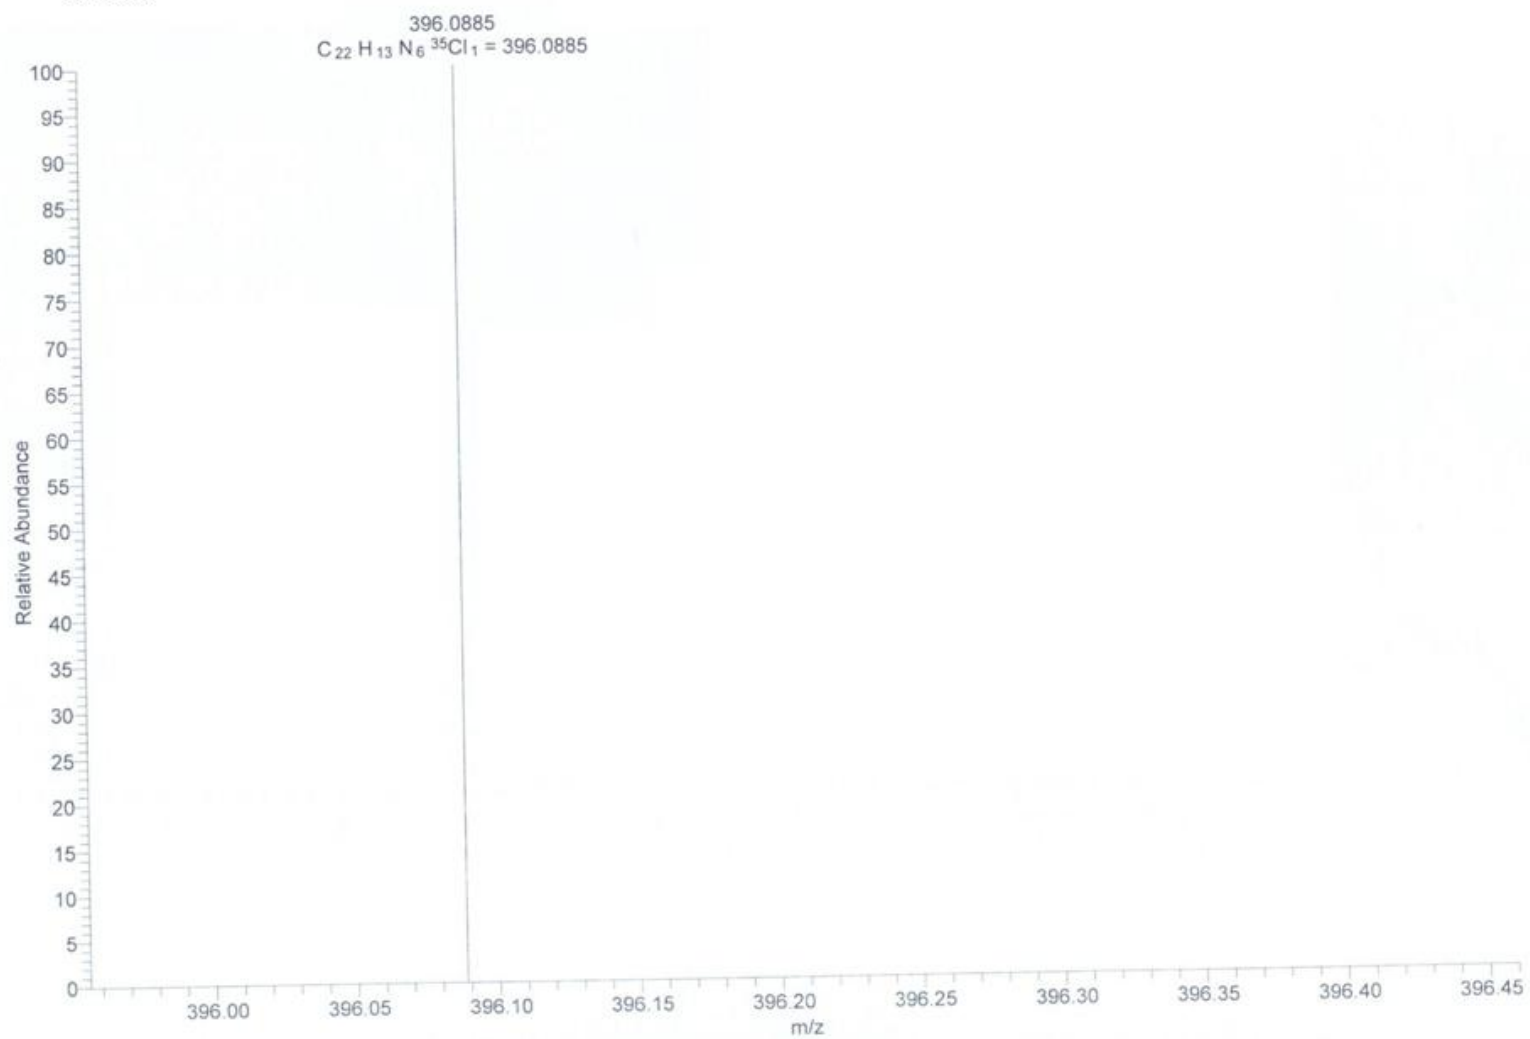

Compound 12b

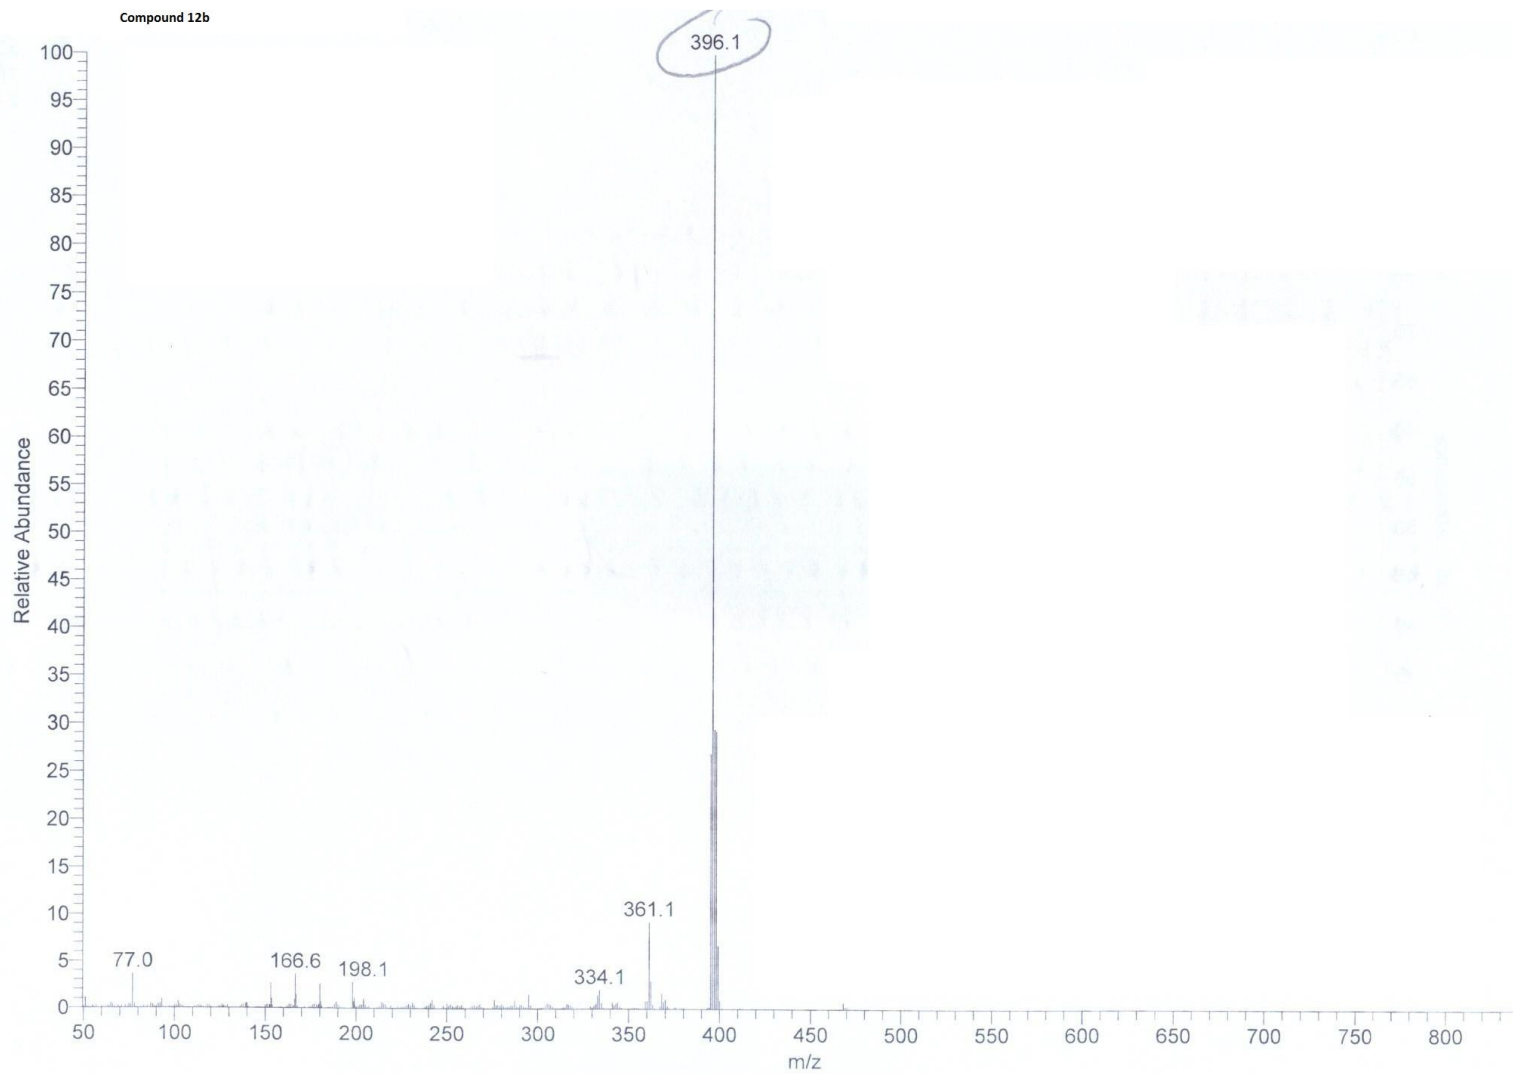

Compound 12b

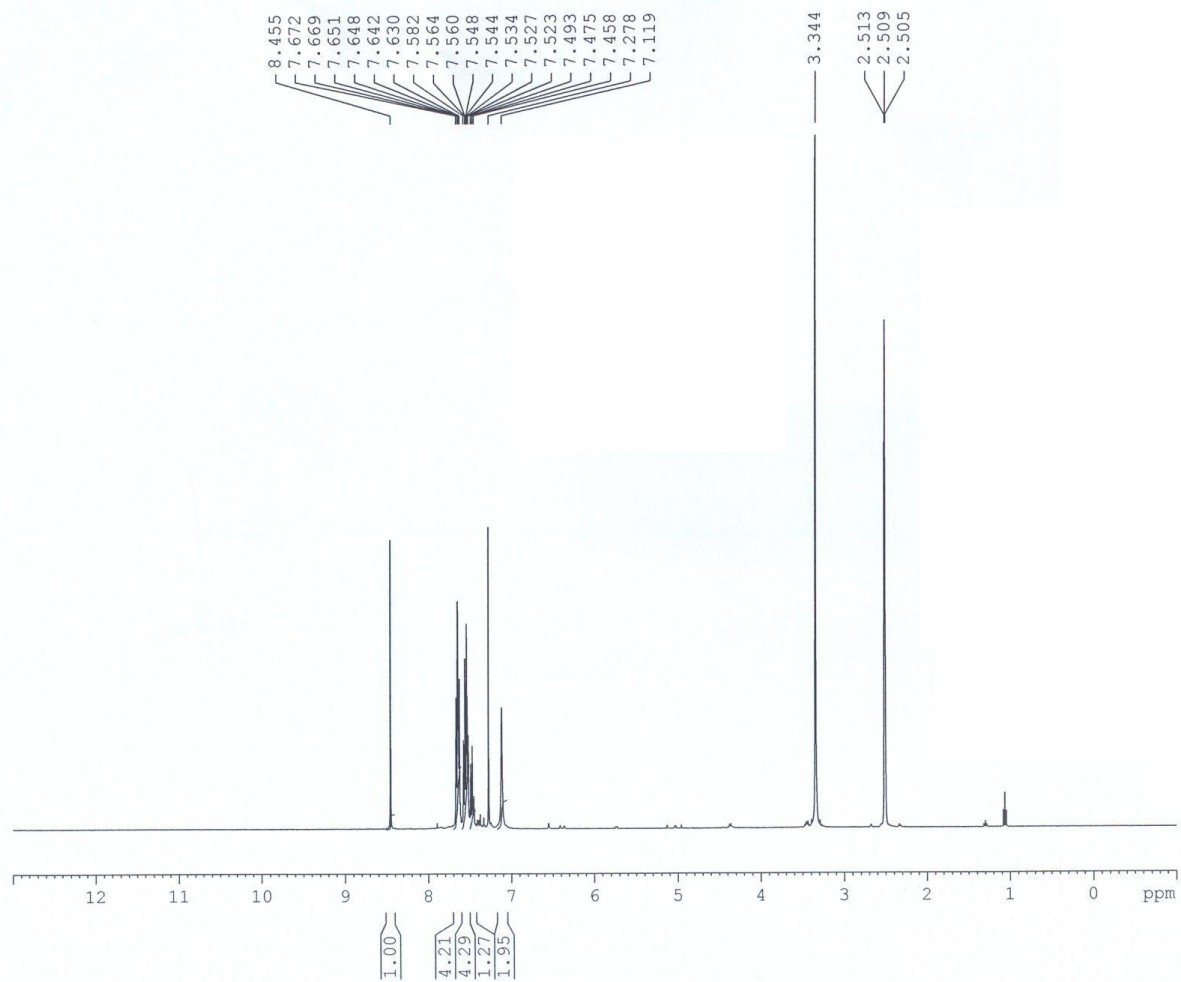

Compound 12b

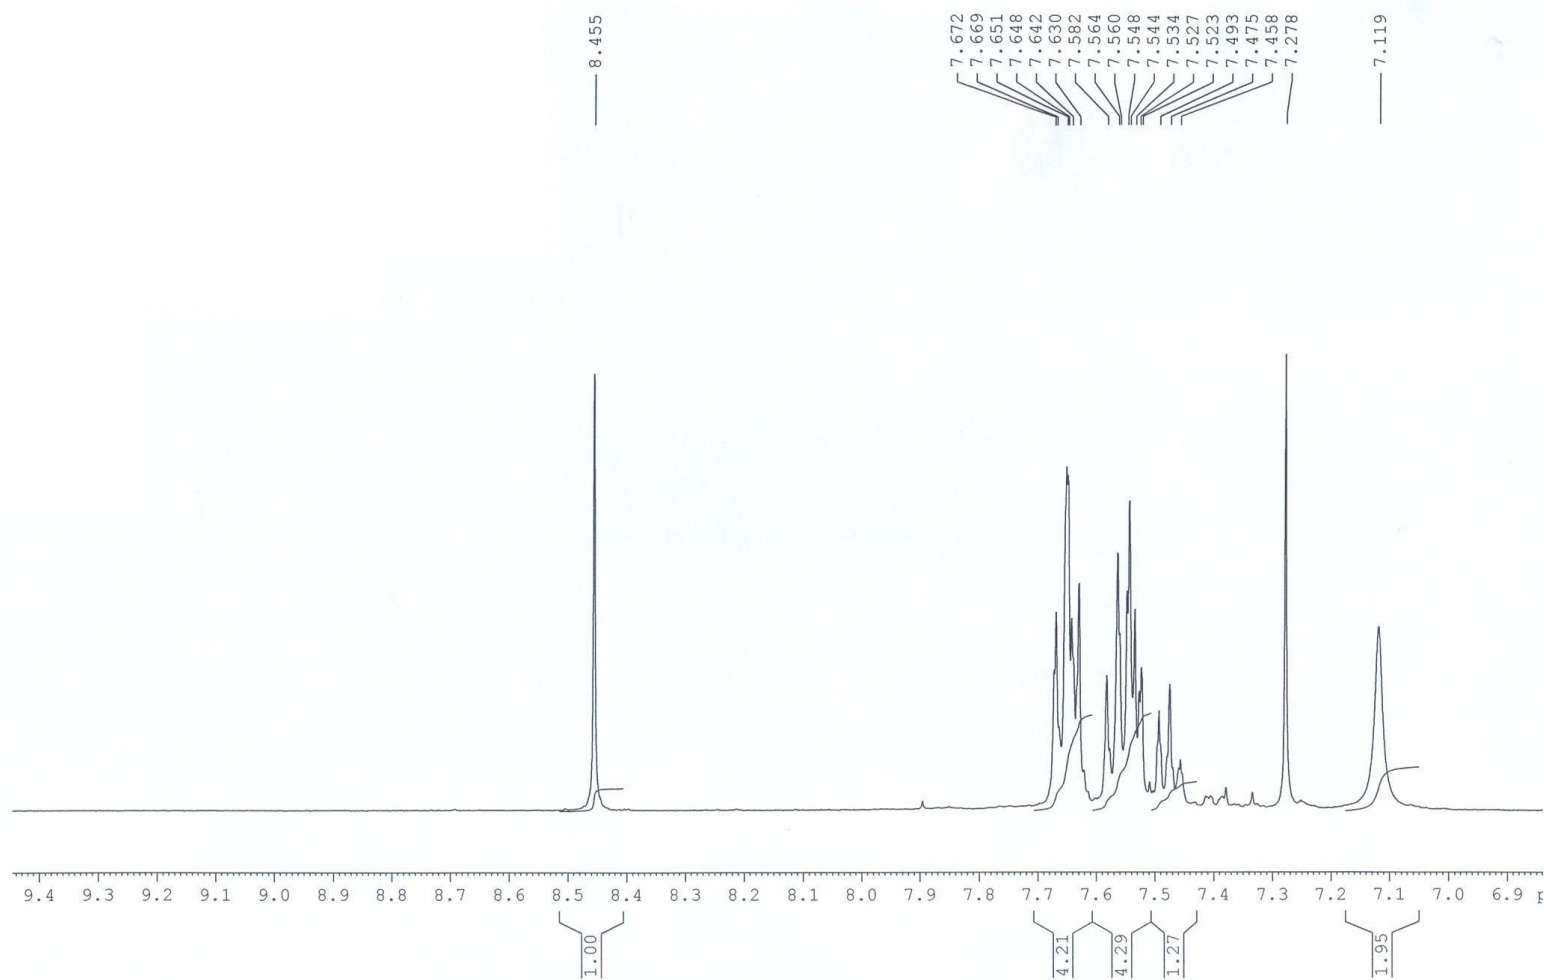

Compound 12b

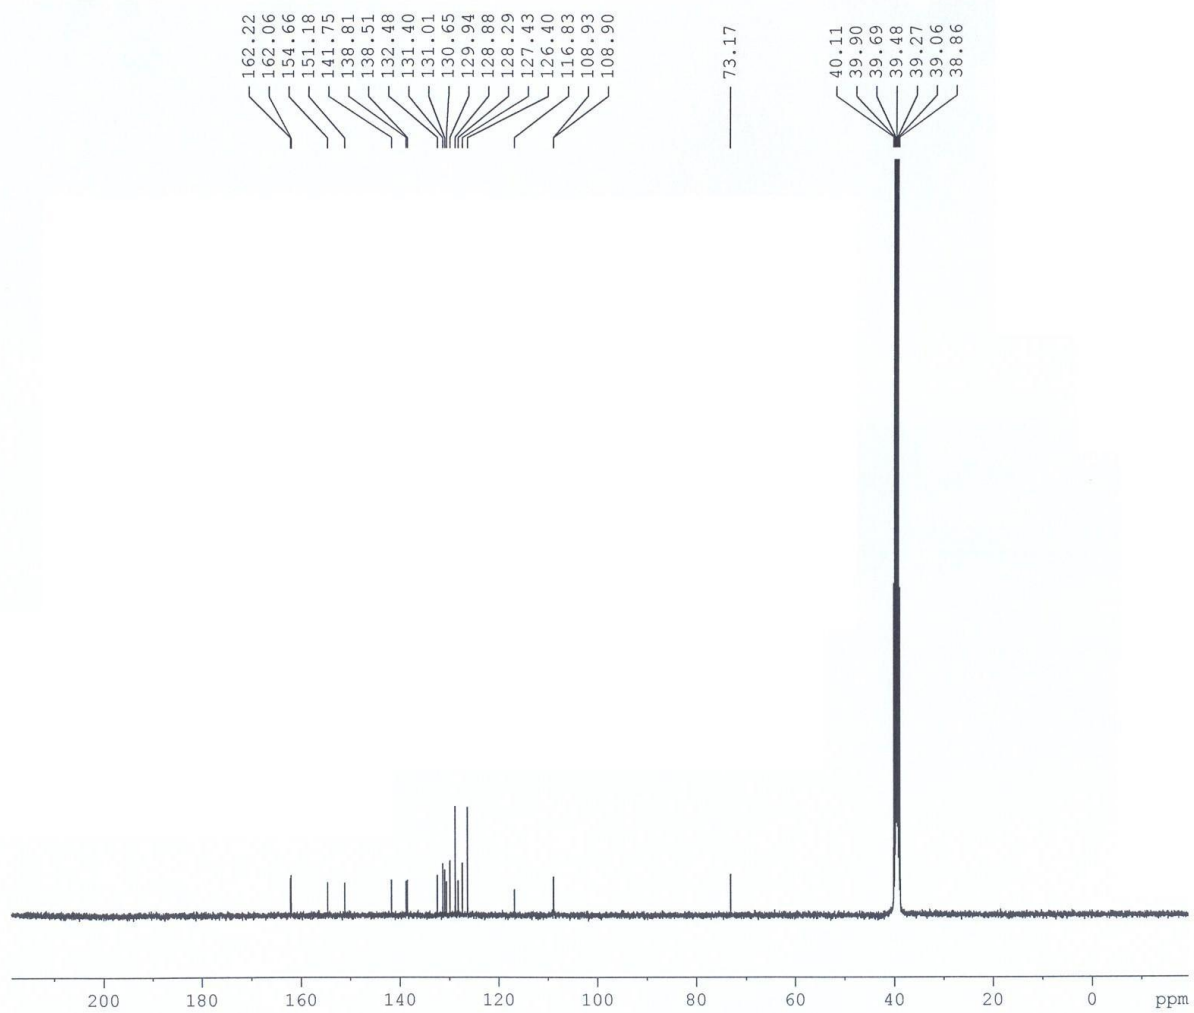

Compound 12b

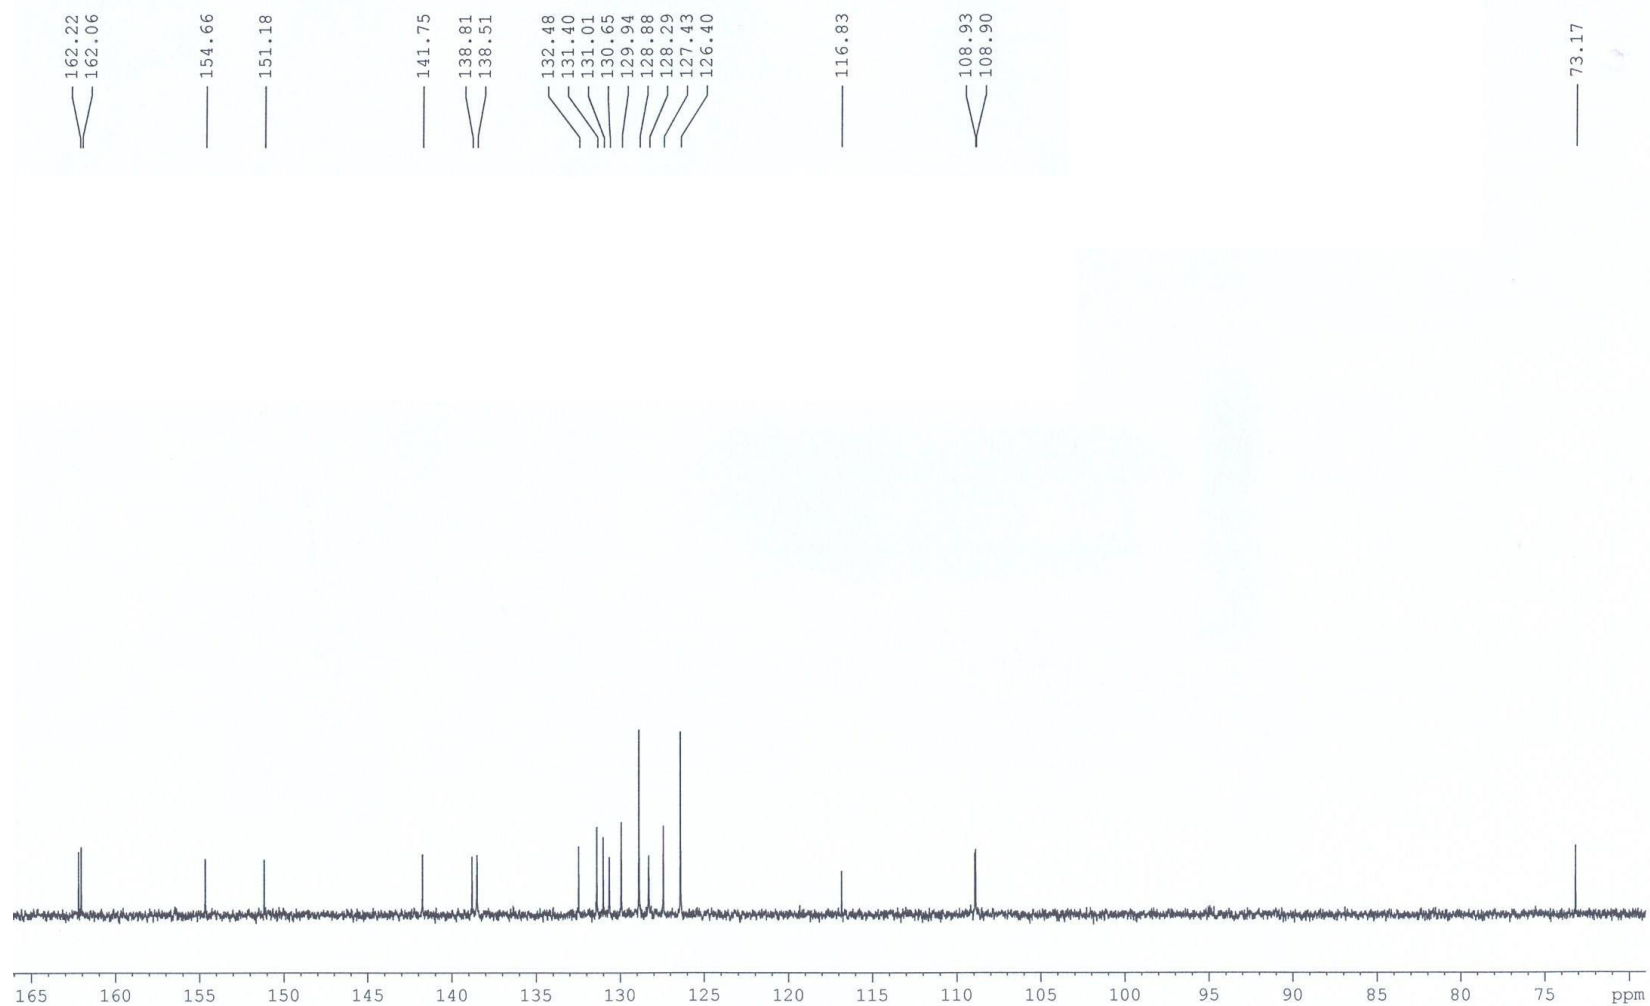

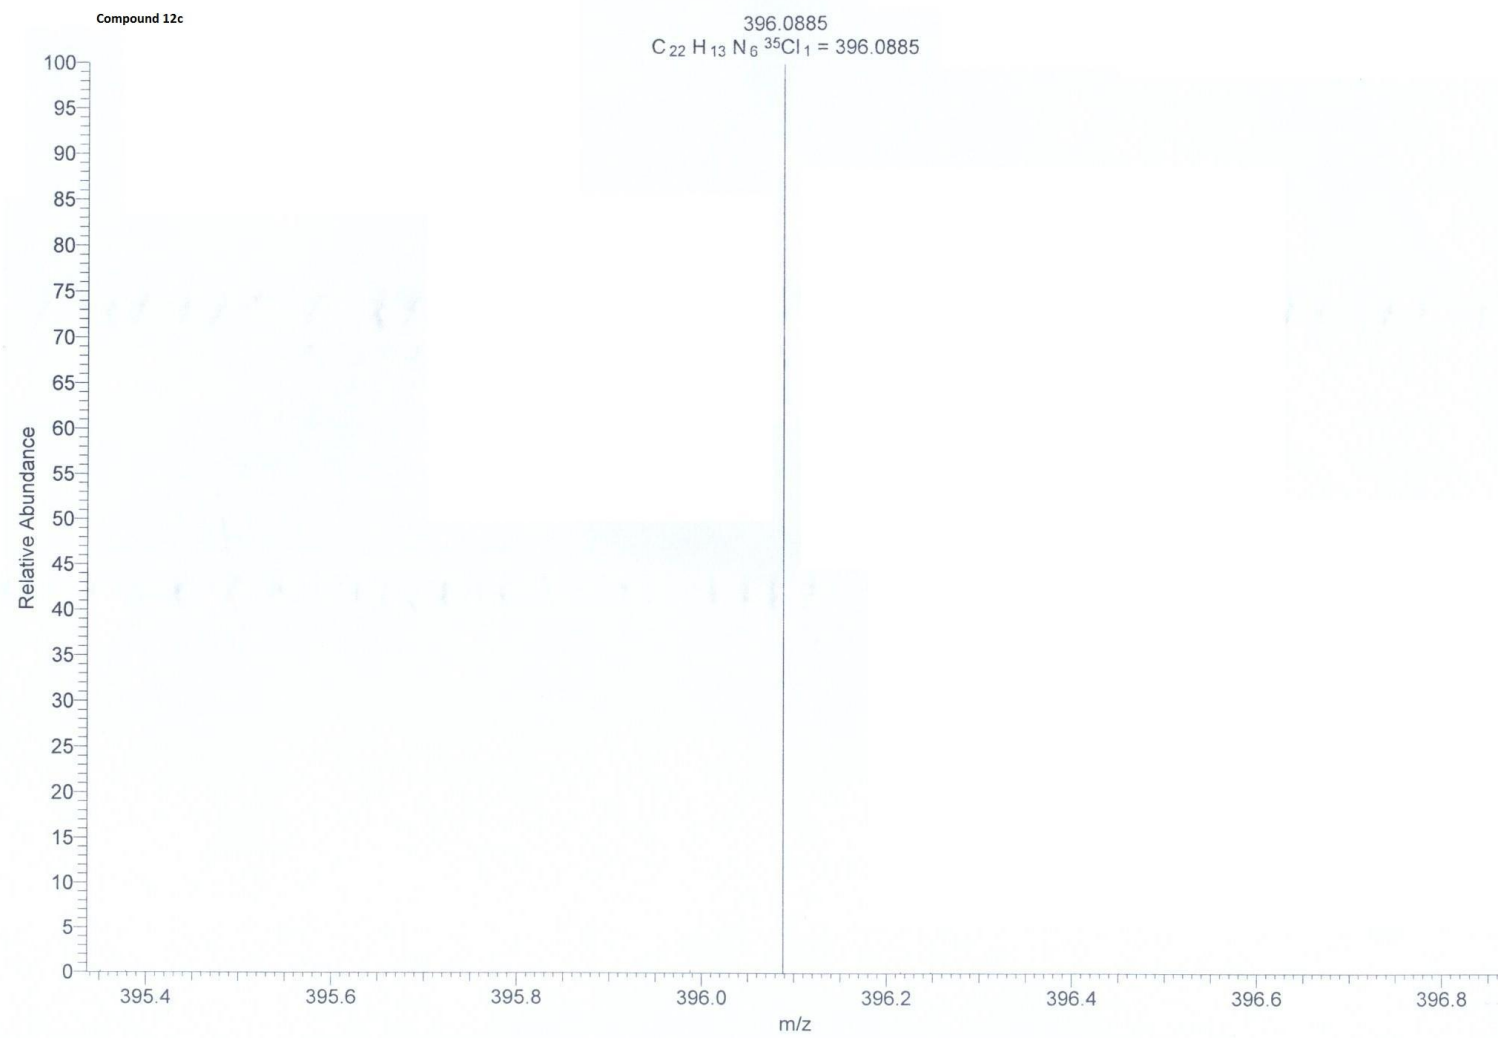

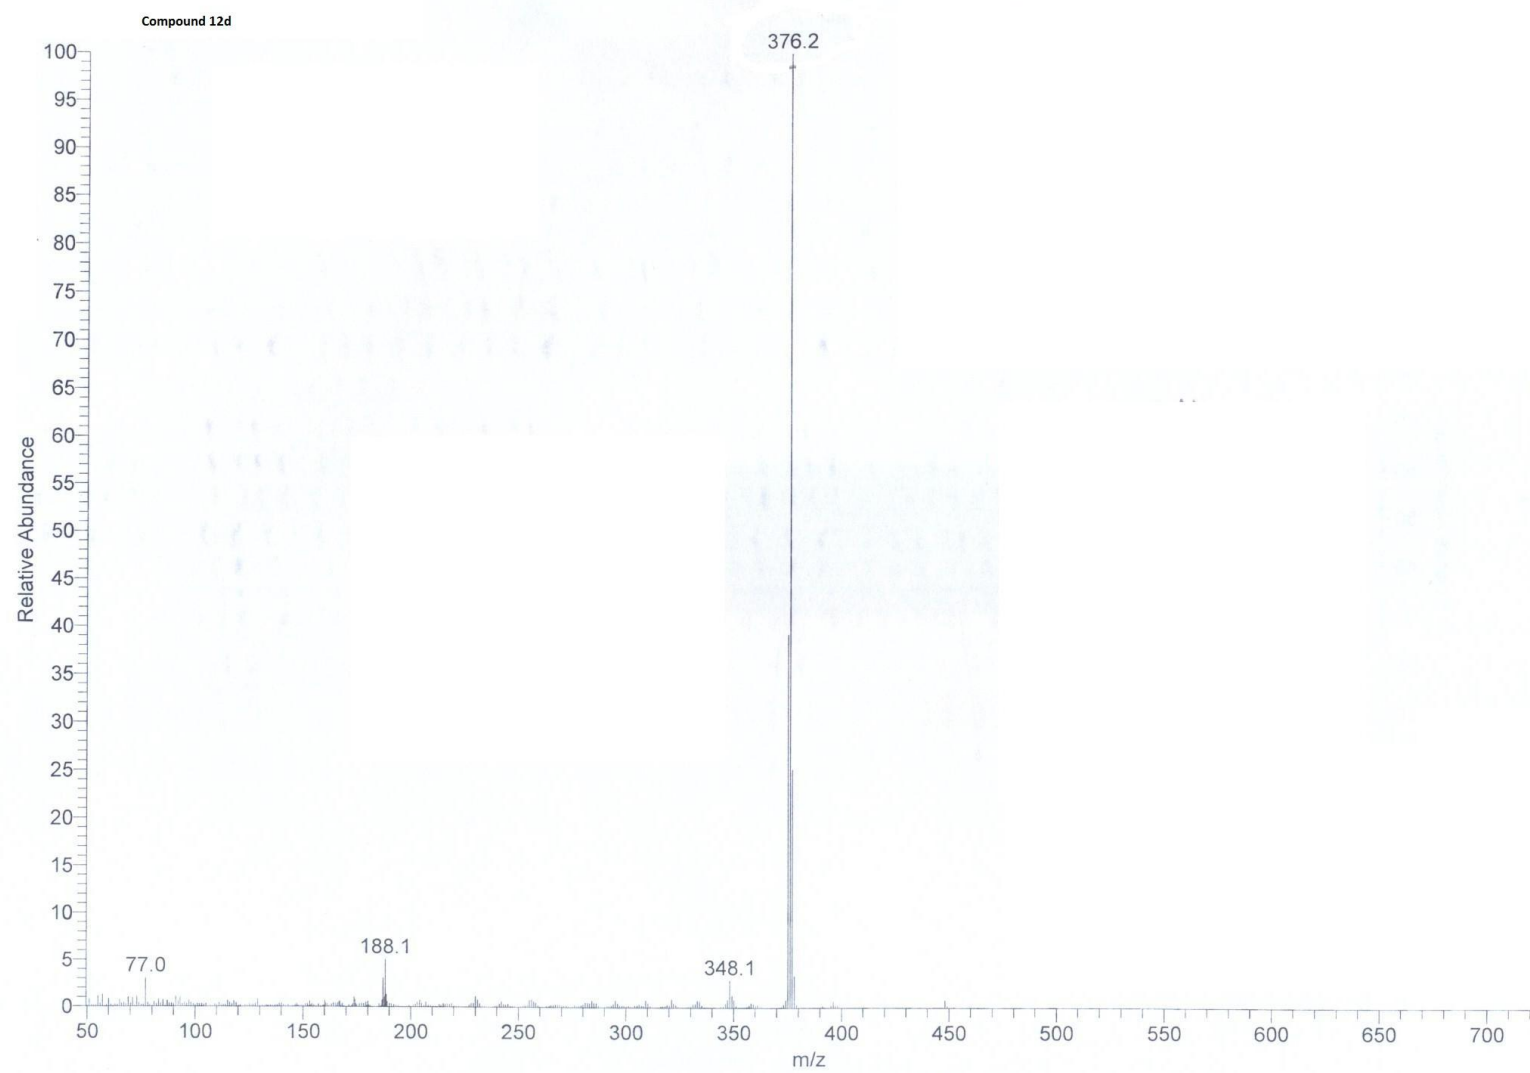



Compound 12d

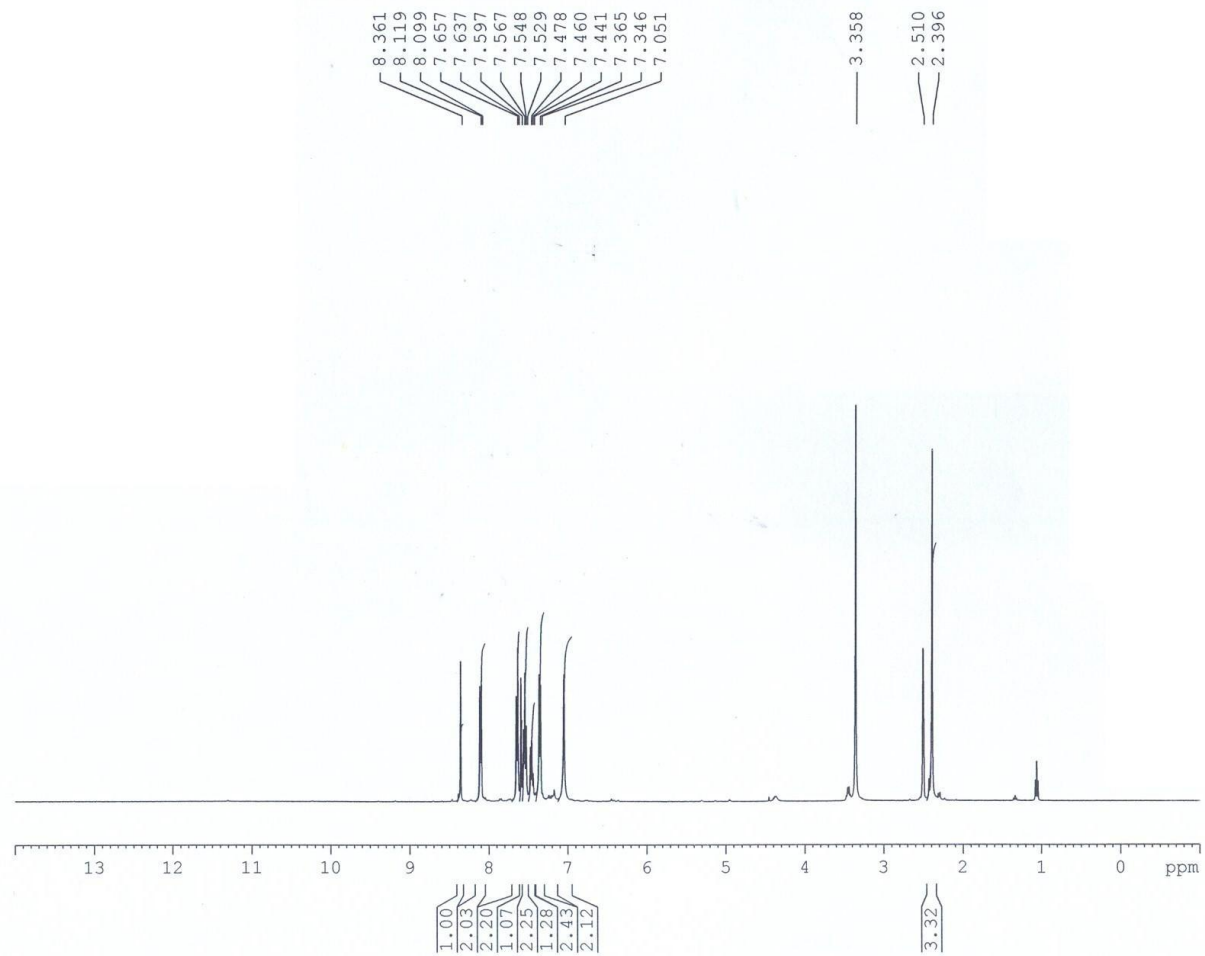

Compound 12d

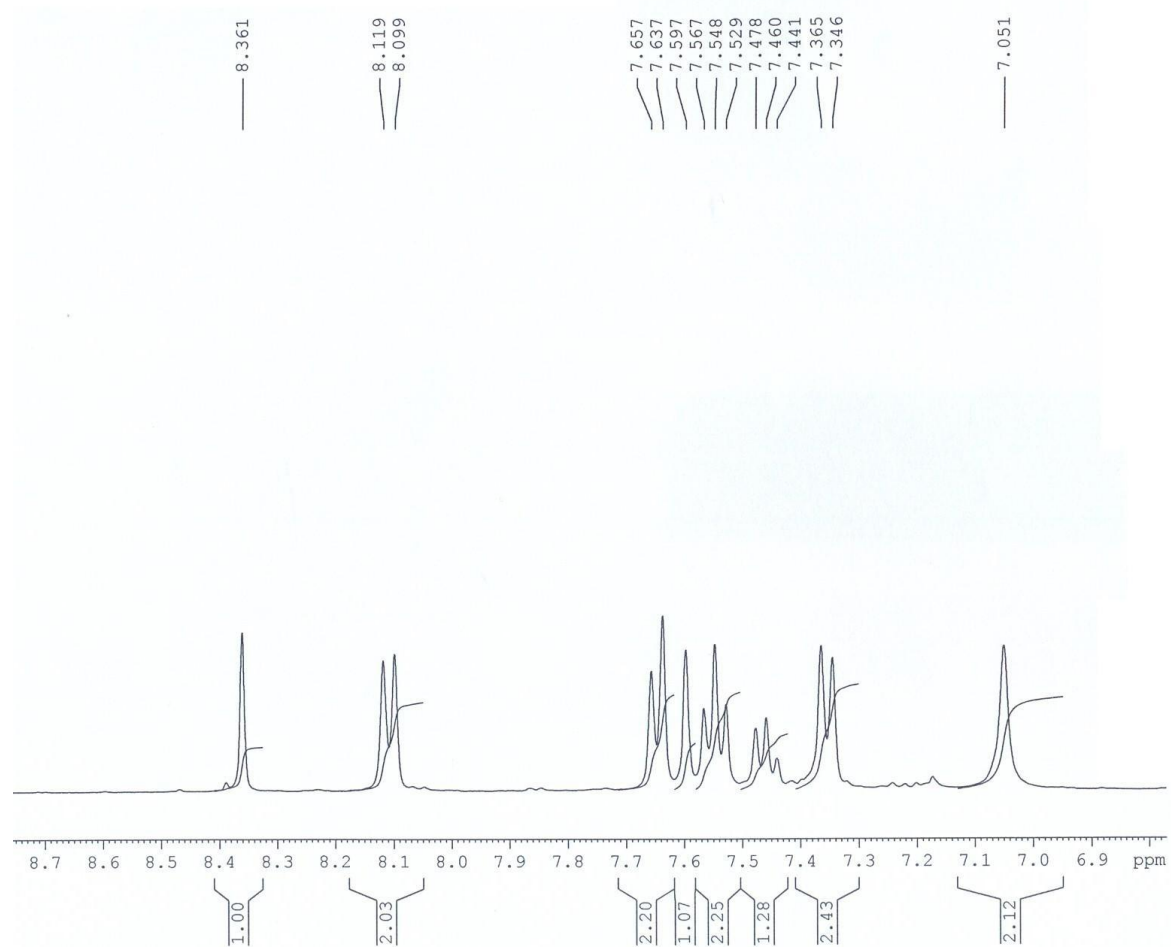

Compound 12d

— 162.06  
— 161.25

— 154.56

— 150.94

— 141.73

— 140.27

— 138.83

— 135.10

— 133.20

— 129.40

— 128.84

— 128.17

— 127.10

— 126.34

— 116.97

— 108.70

— 104.28

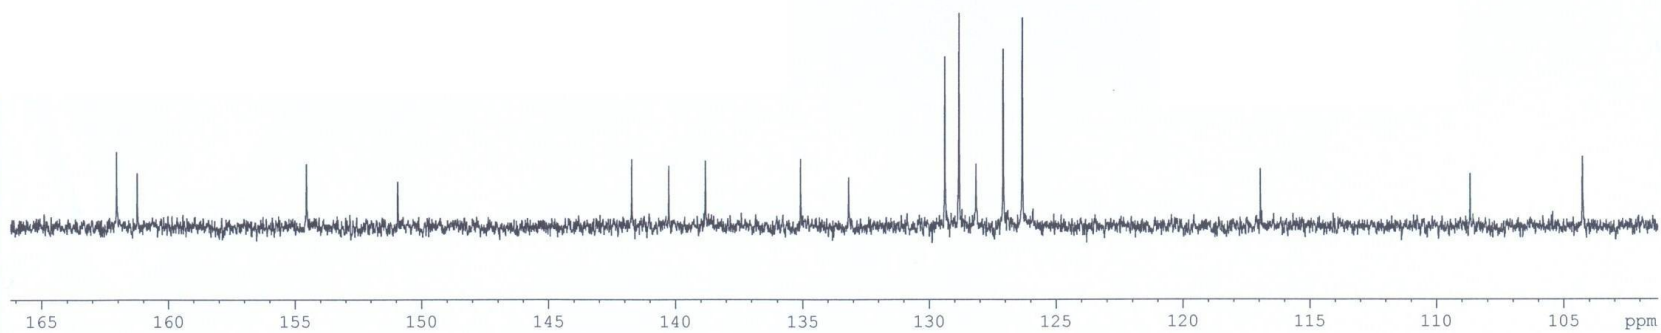

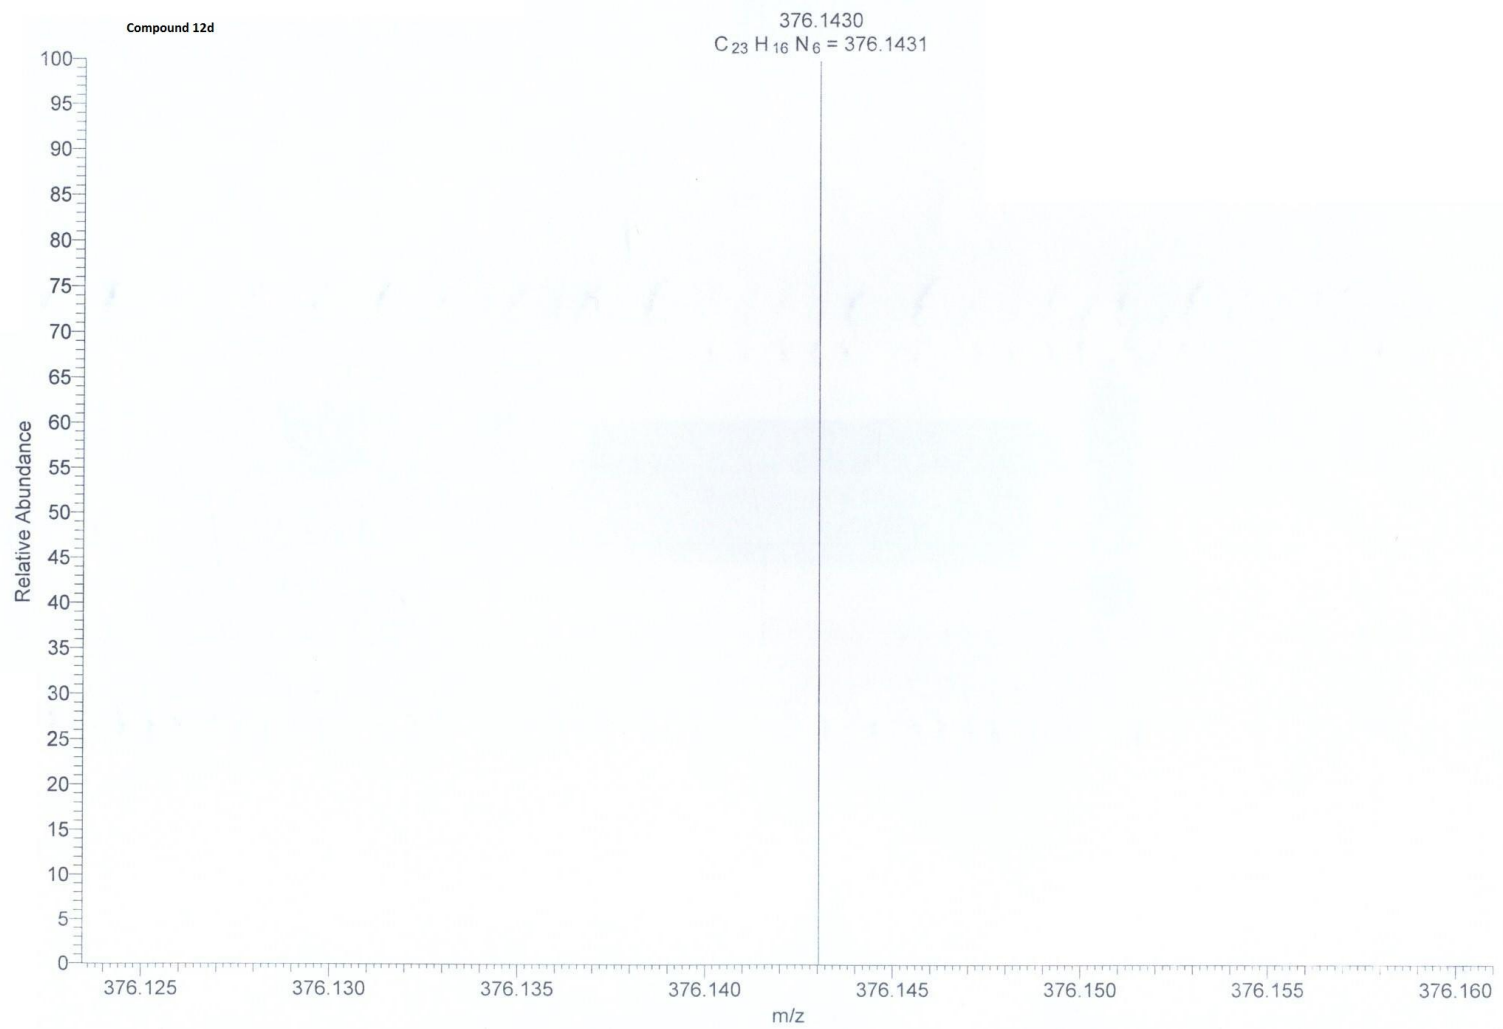

Compound 12d

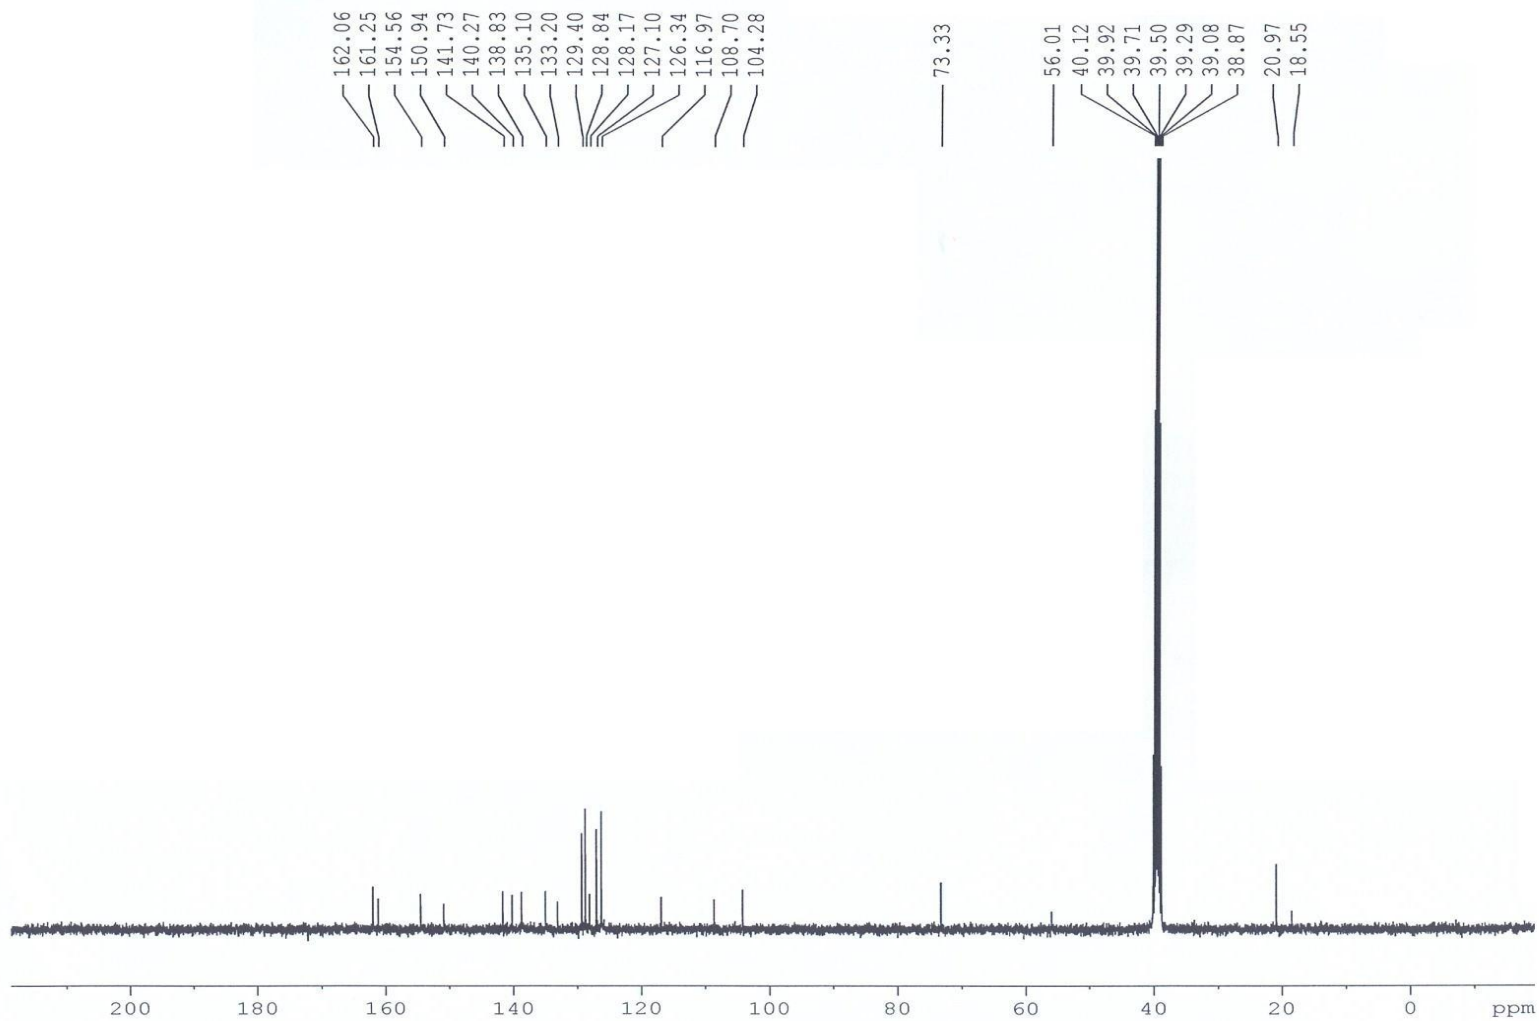

Compound 12e

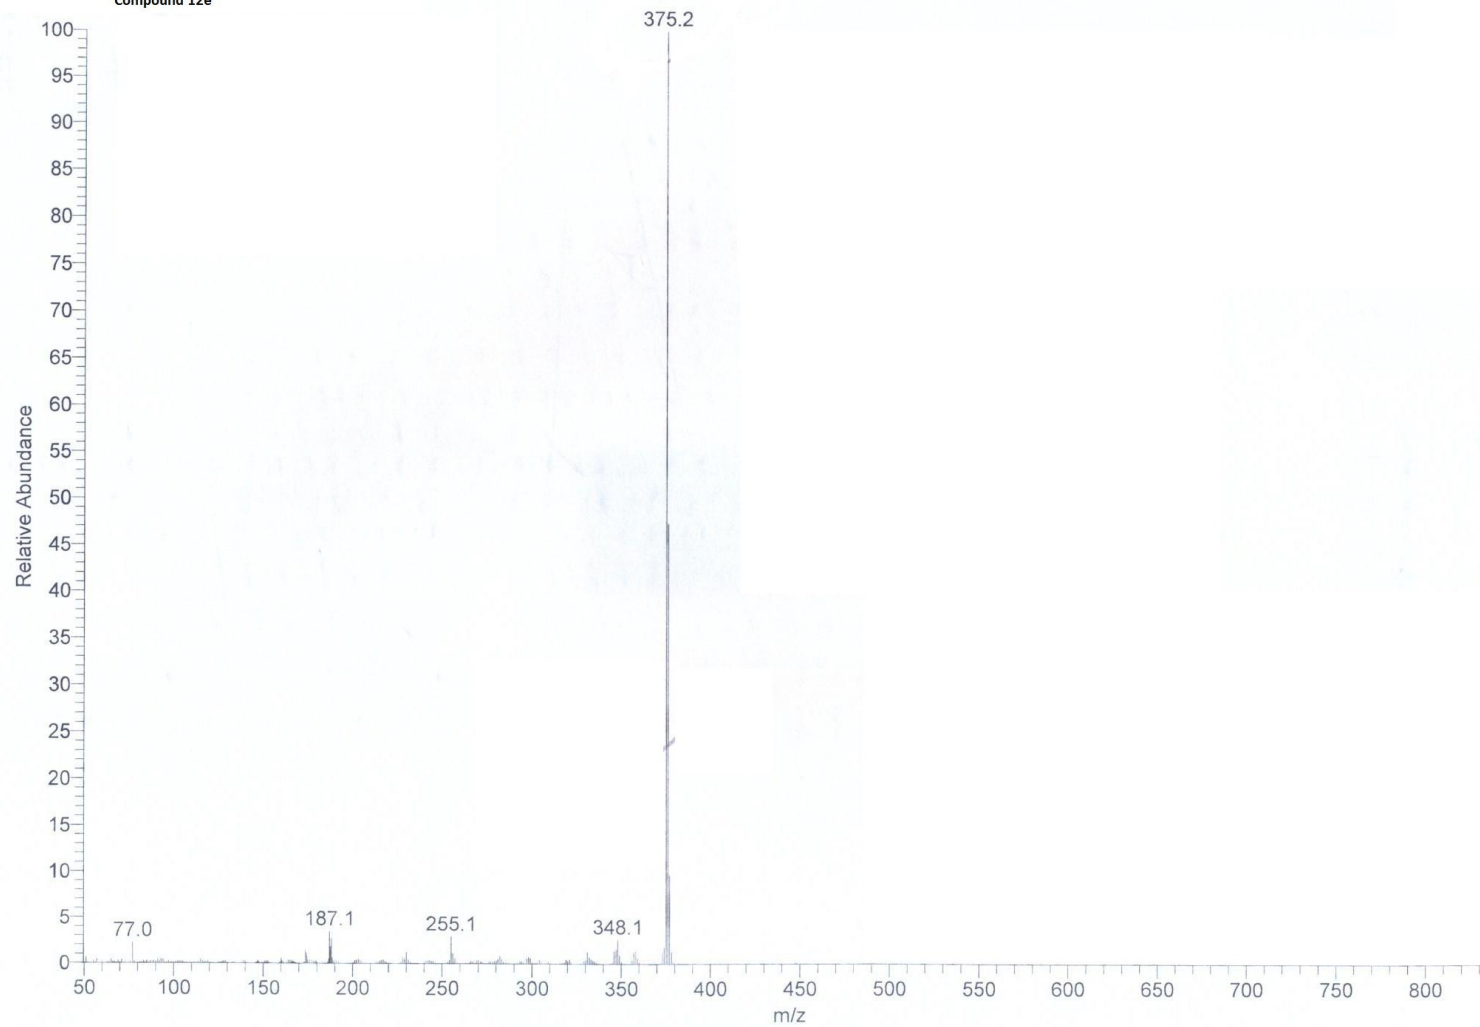

Compound 12e

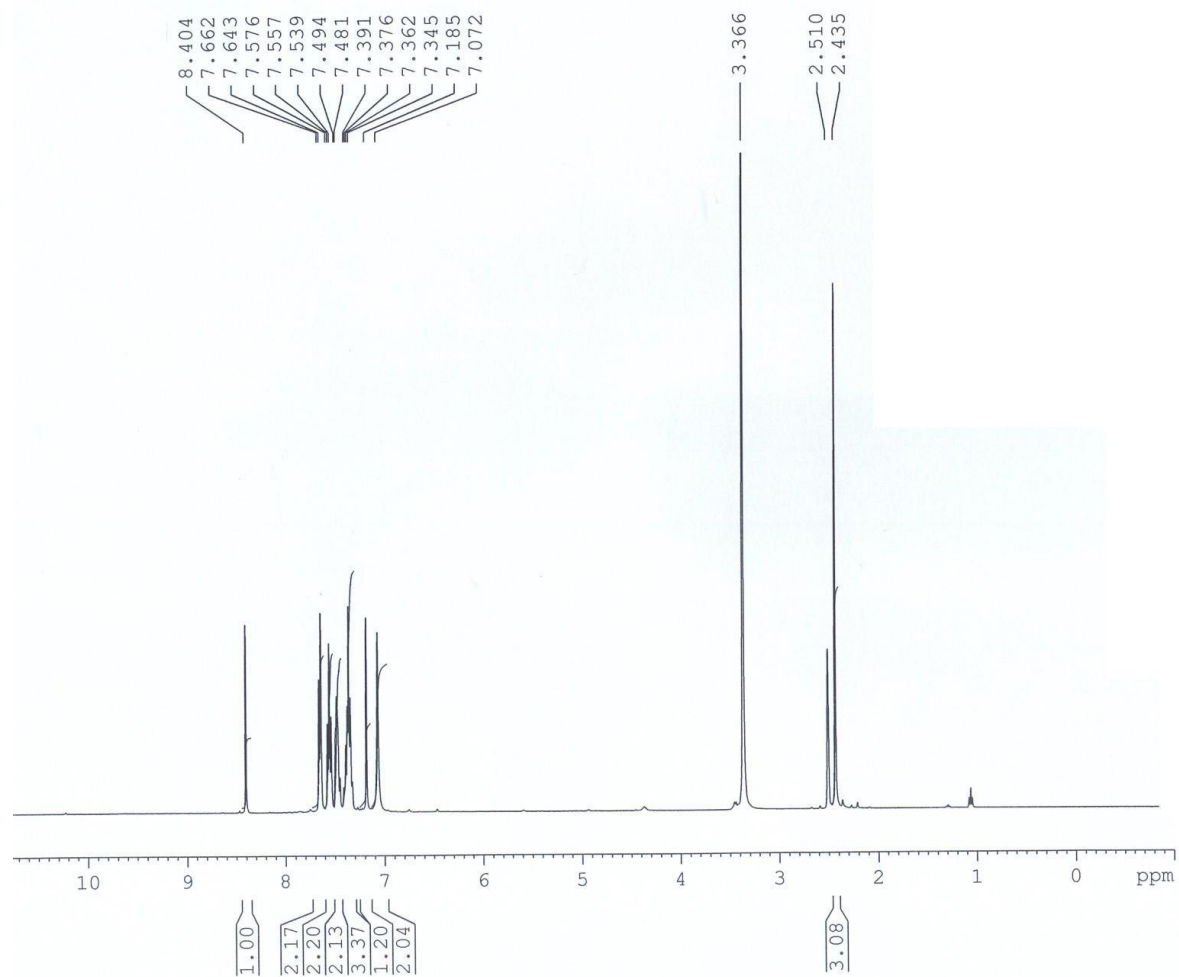

Compound 12e

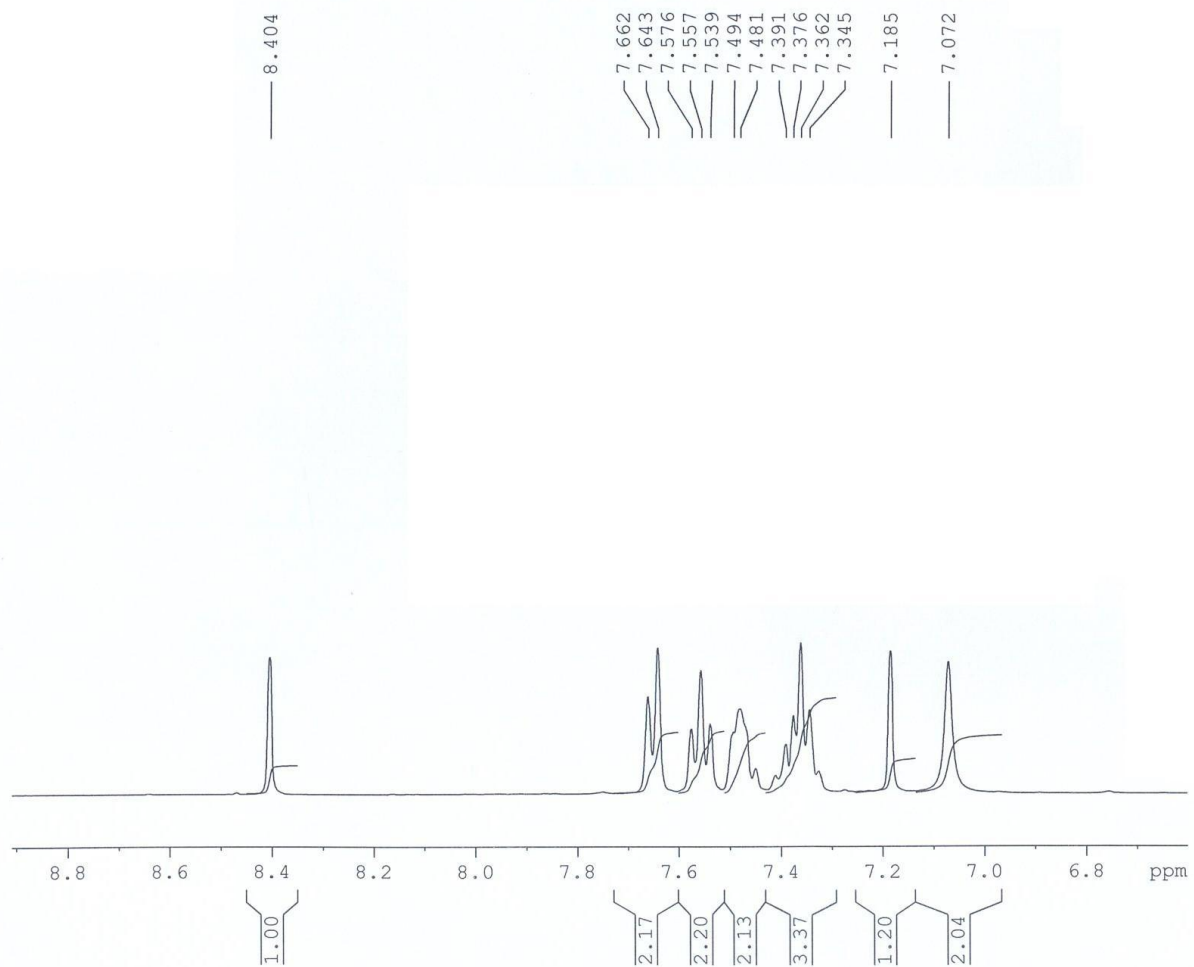



Compound 12e

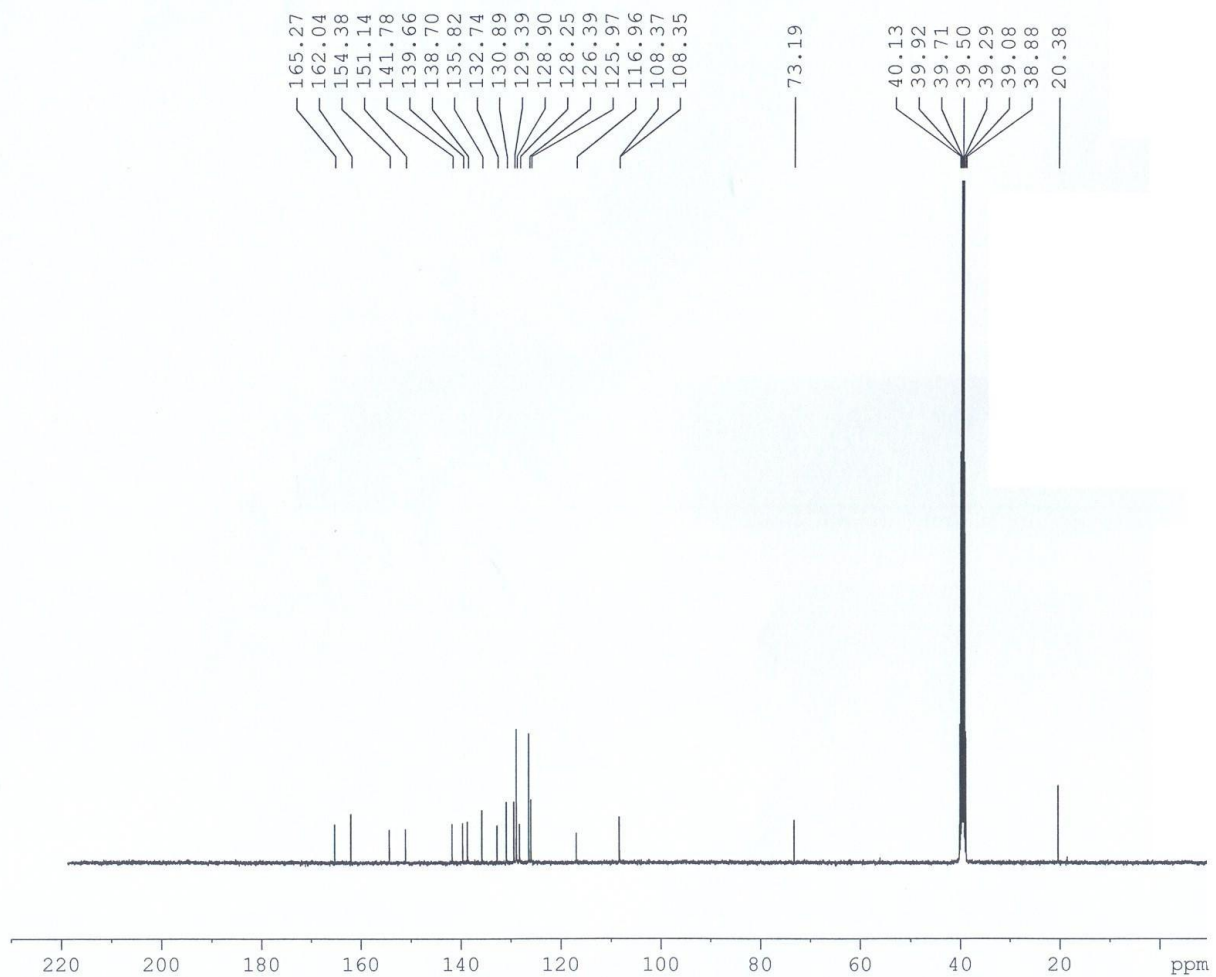

Compound 12e

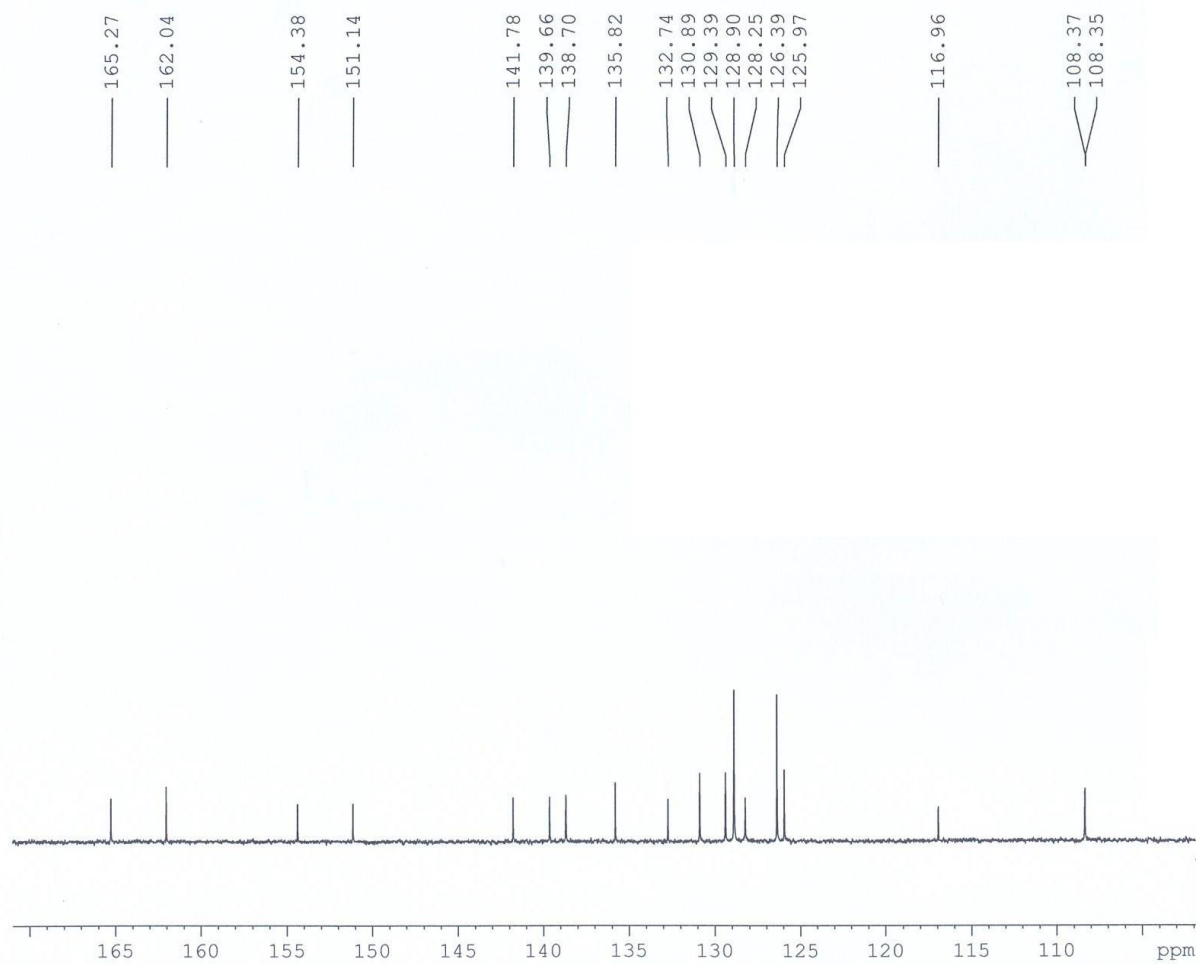

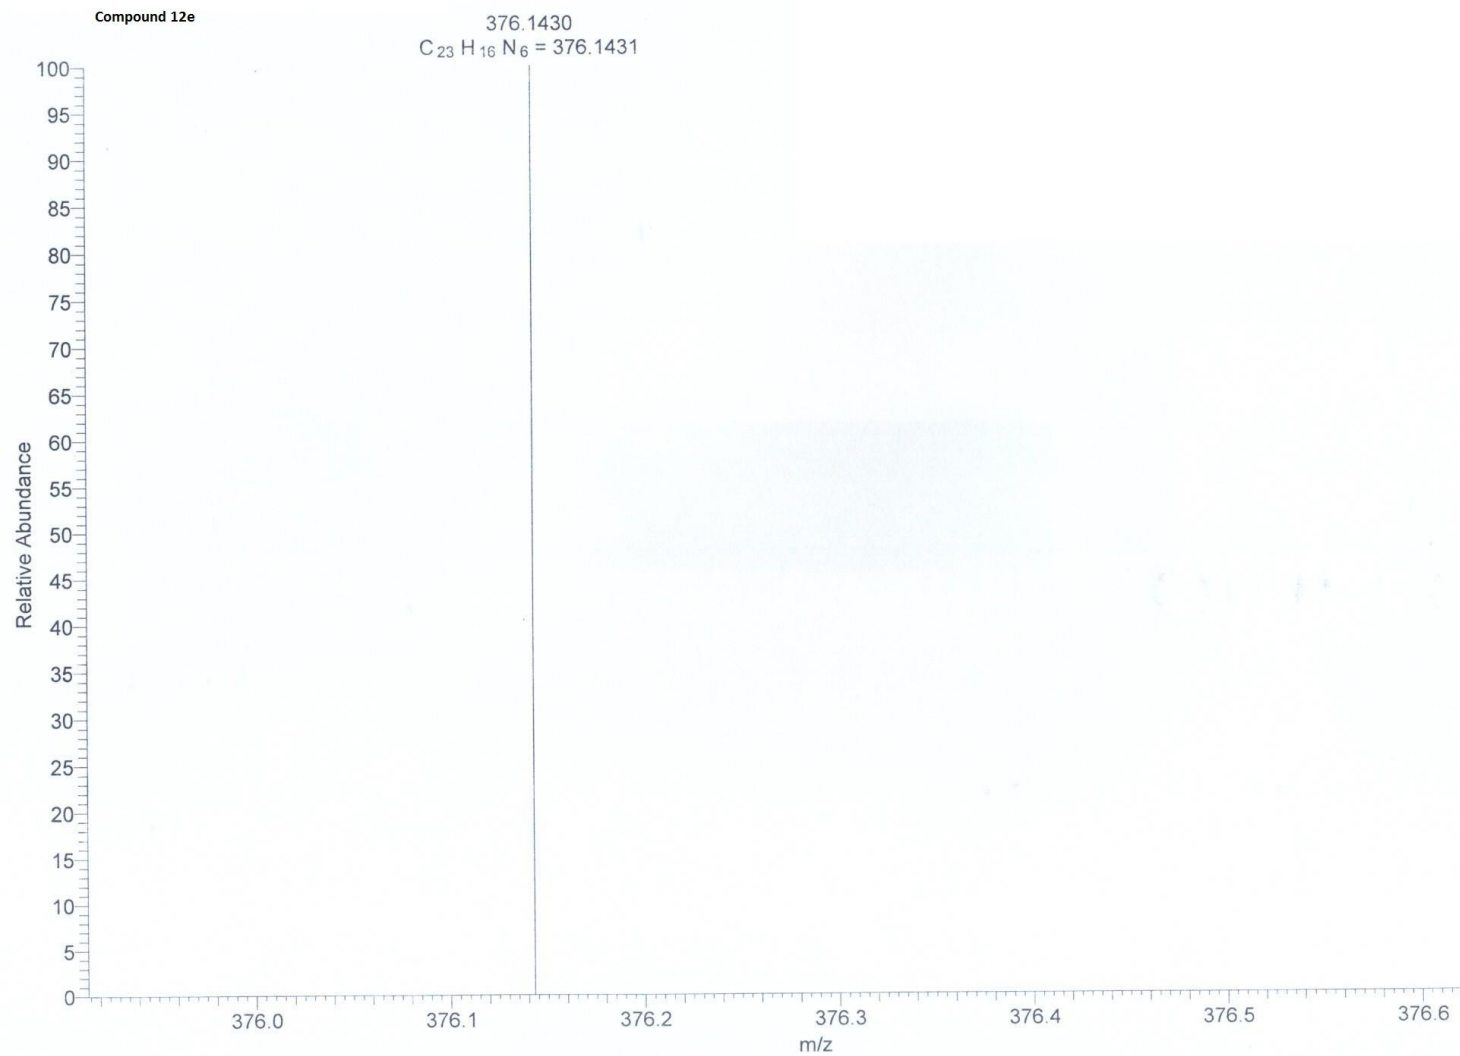

Compound 12f

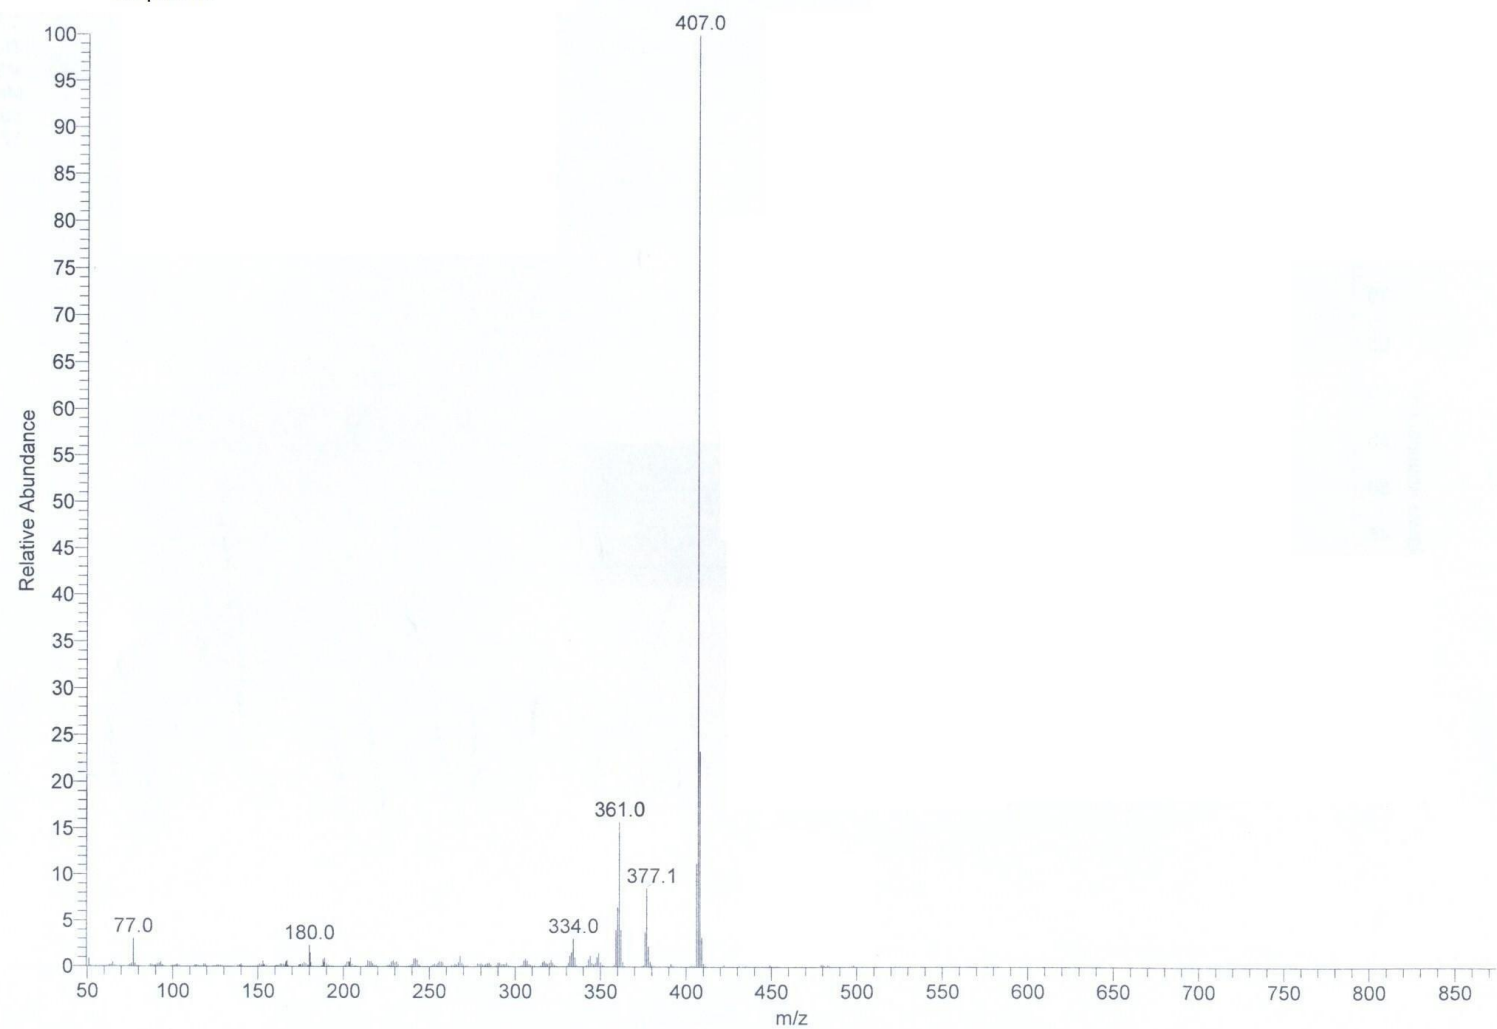

Compound 12f

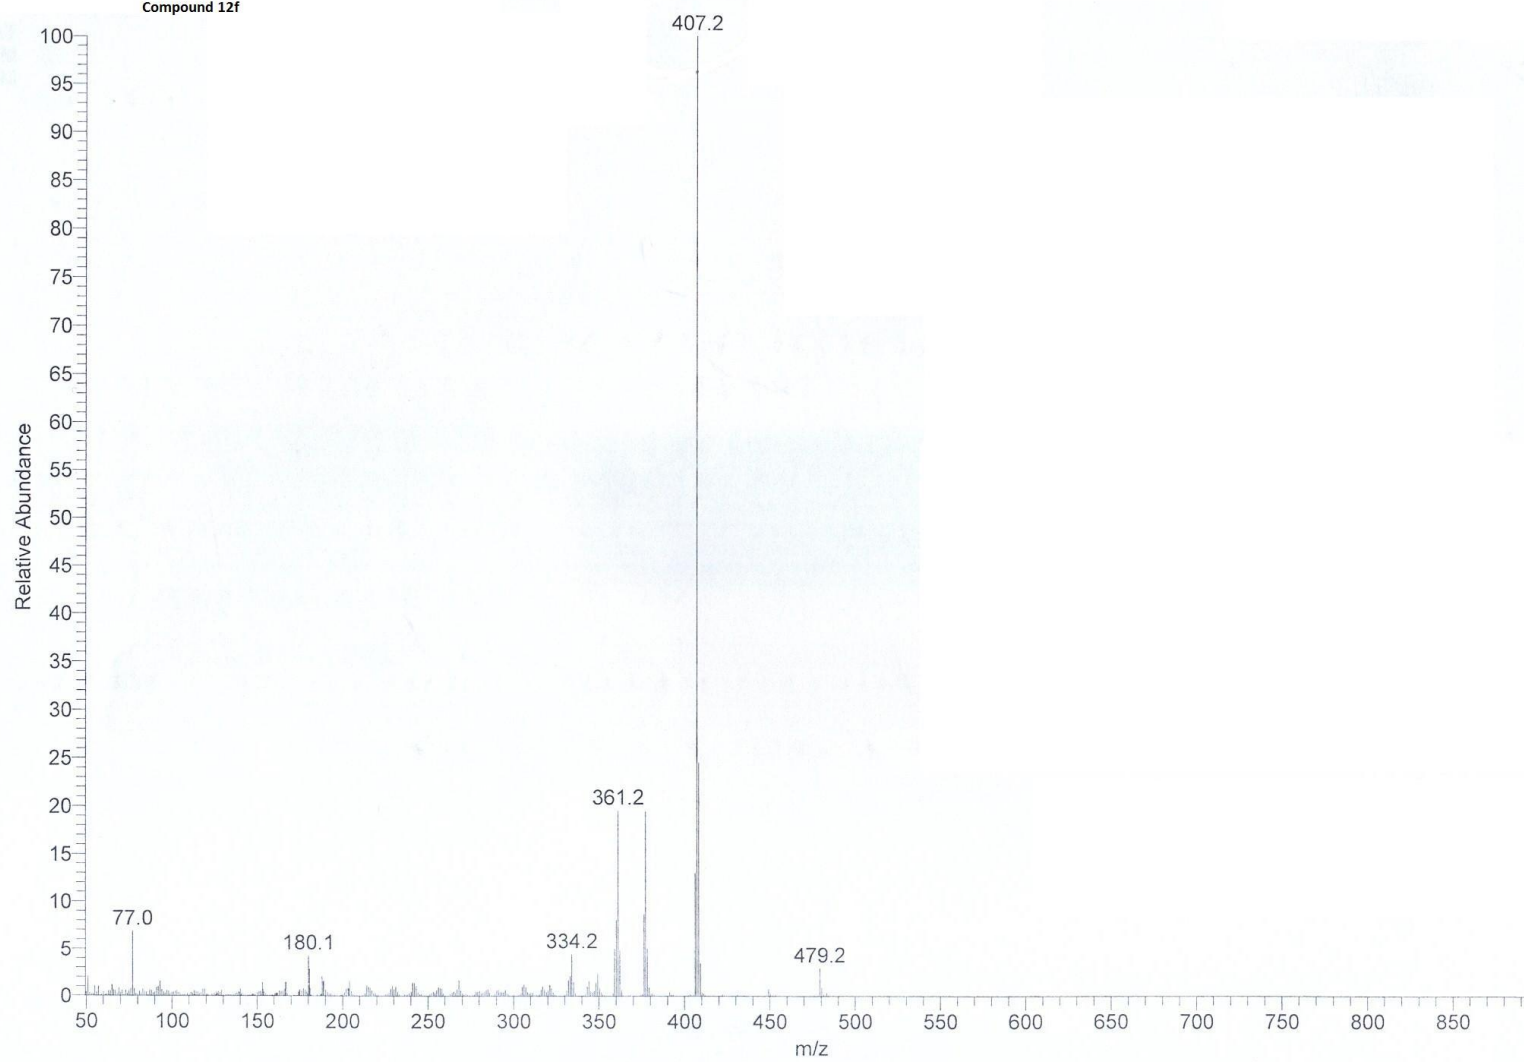

Compound 12f

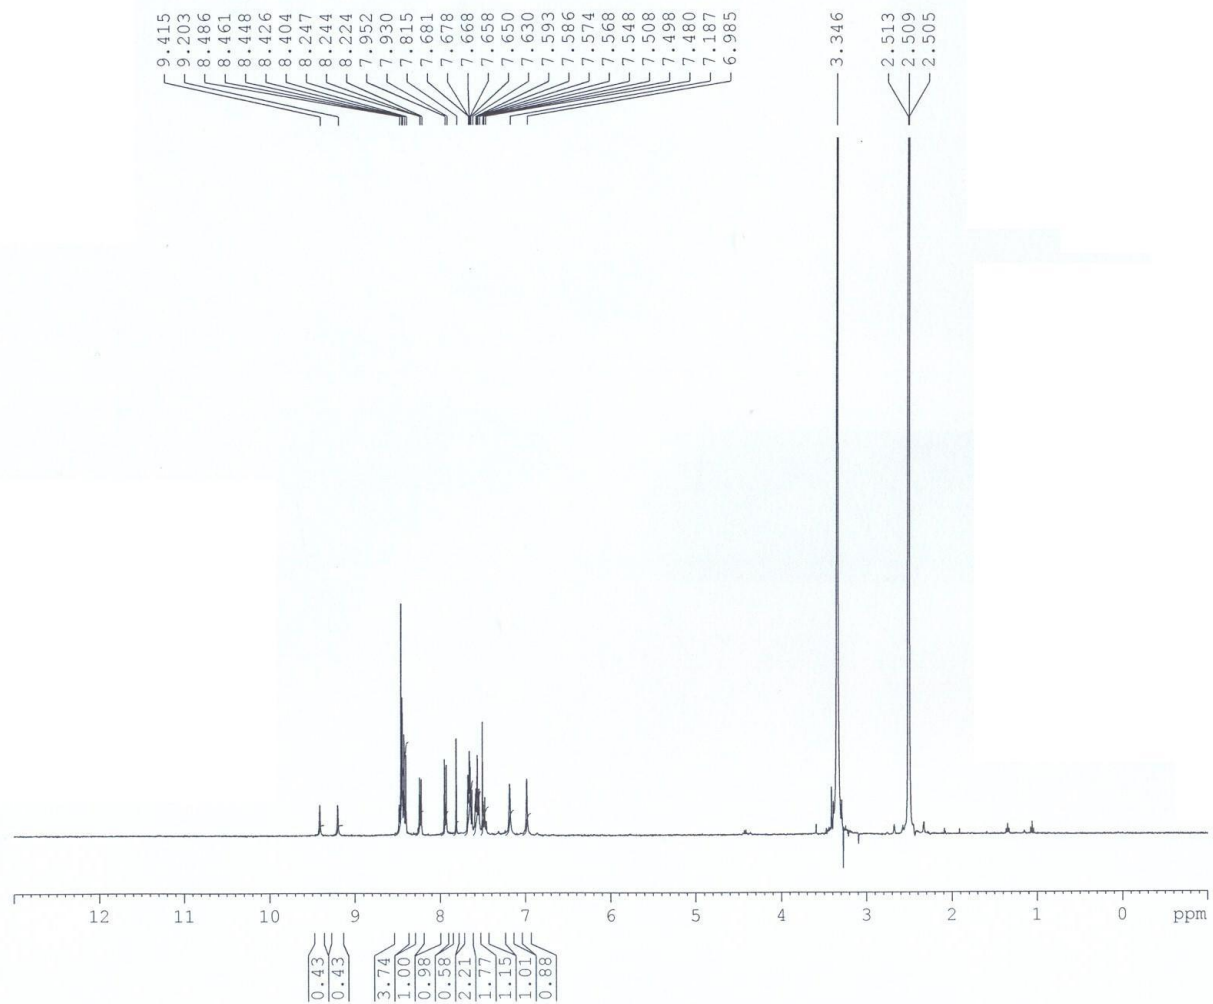

Compound 12f

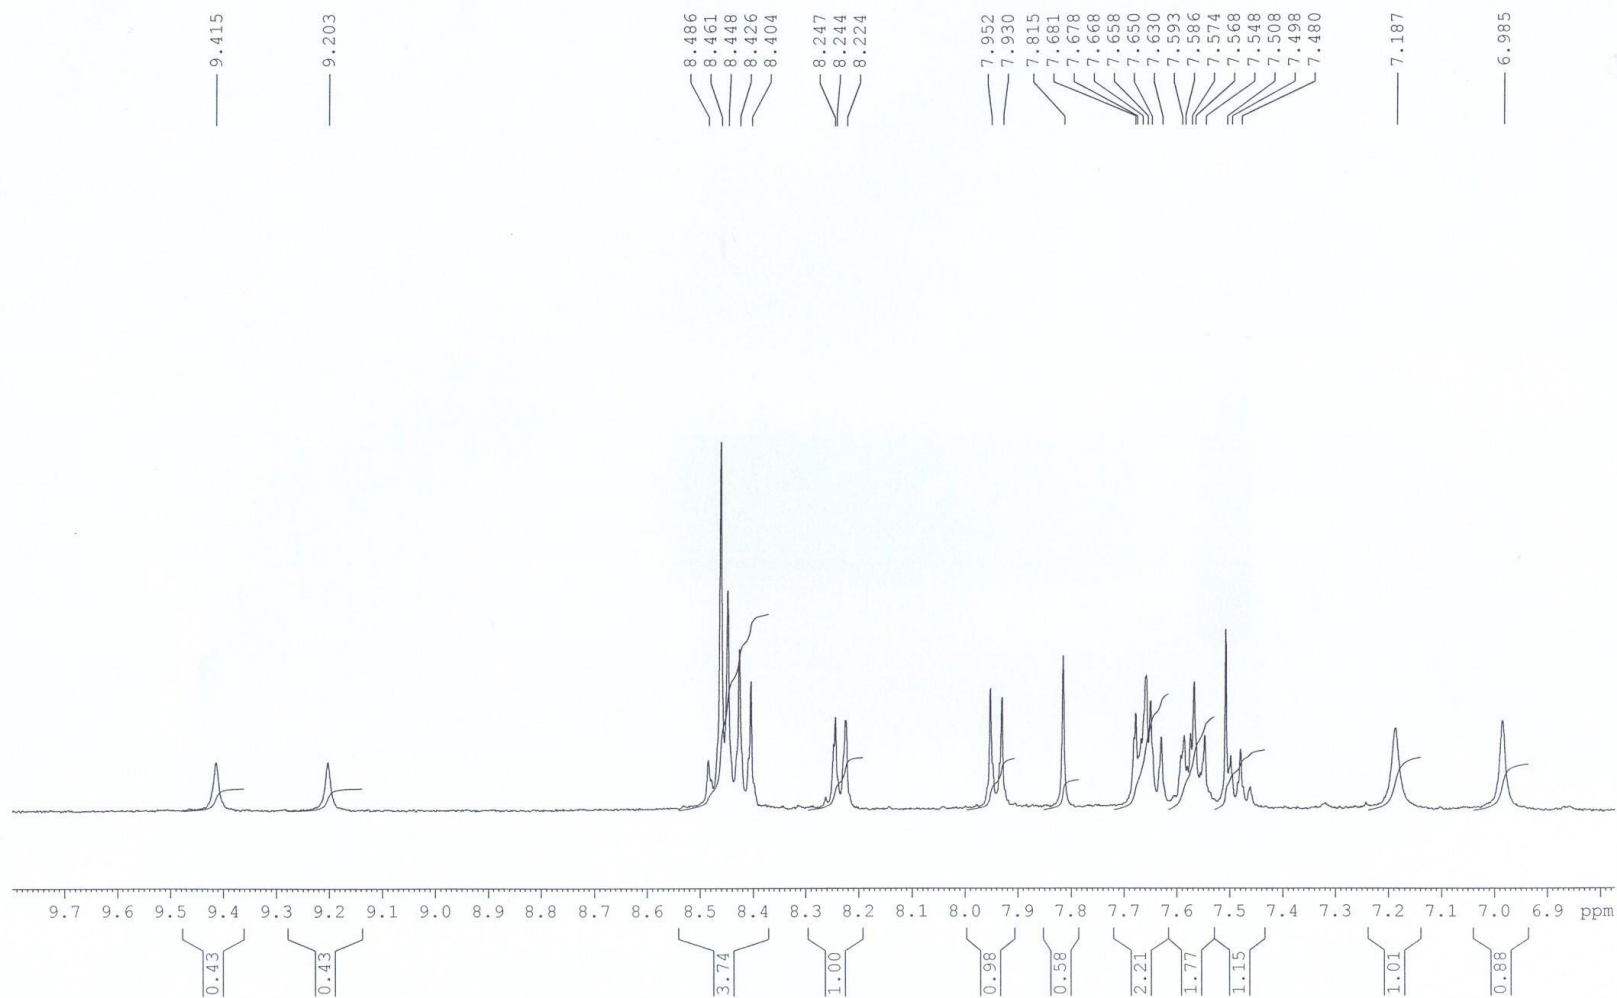

Compound 12f

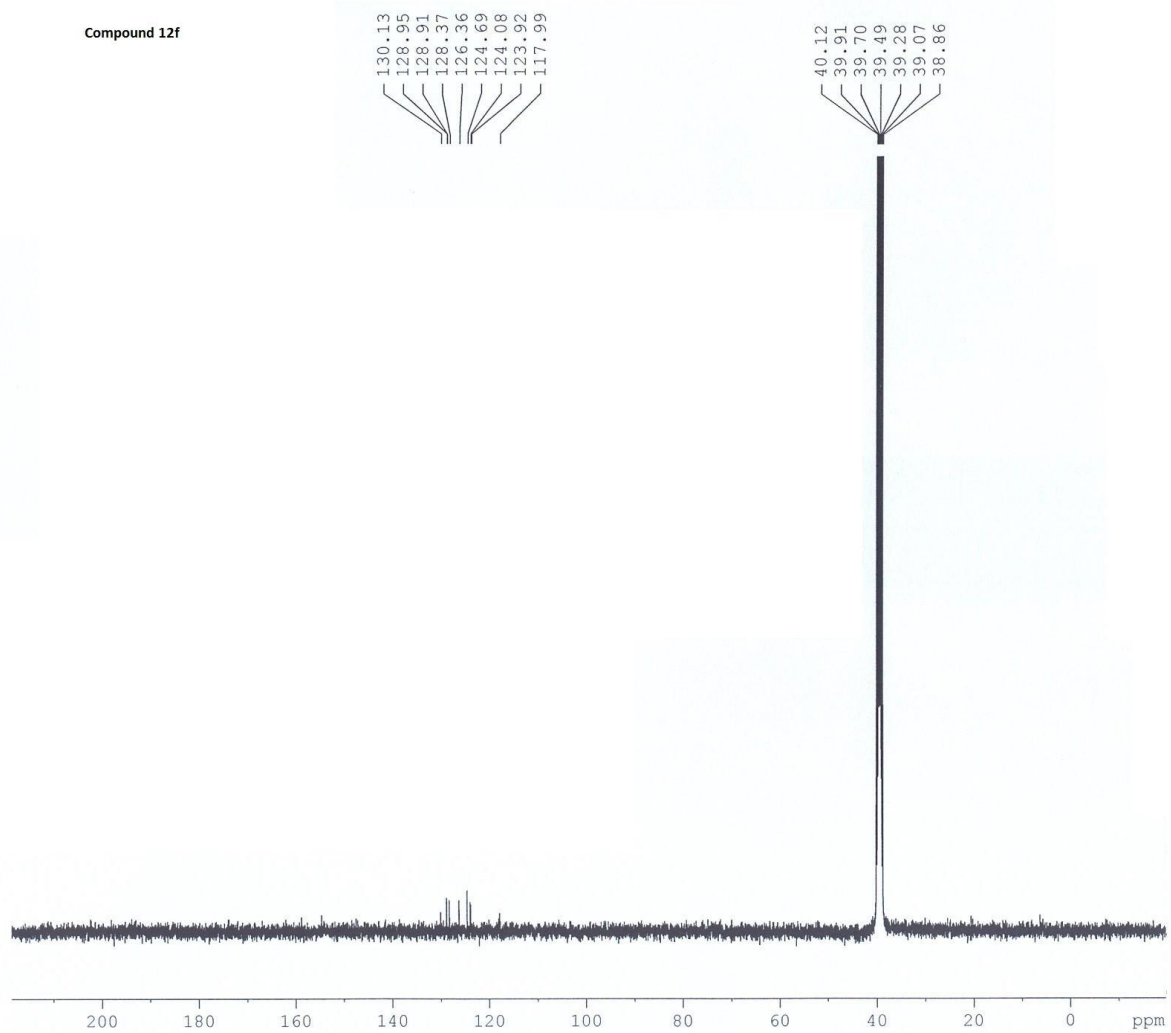



Compound 12f

— 130.13

128.95  
128.91

— 128.37

— 126.36

124.69  
124.08  
123.92

— 117.99

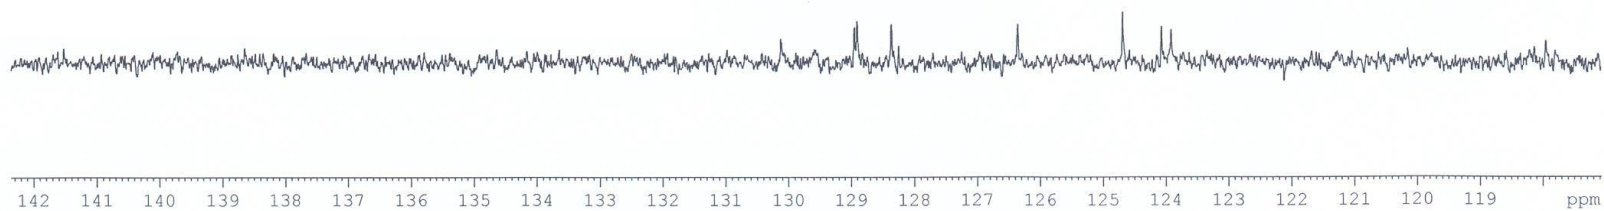

Compound 12f

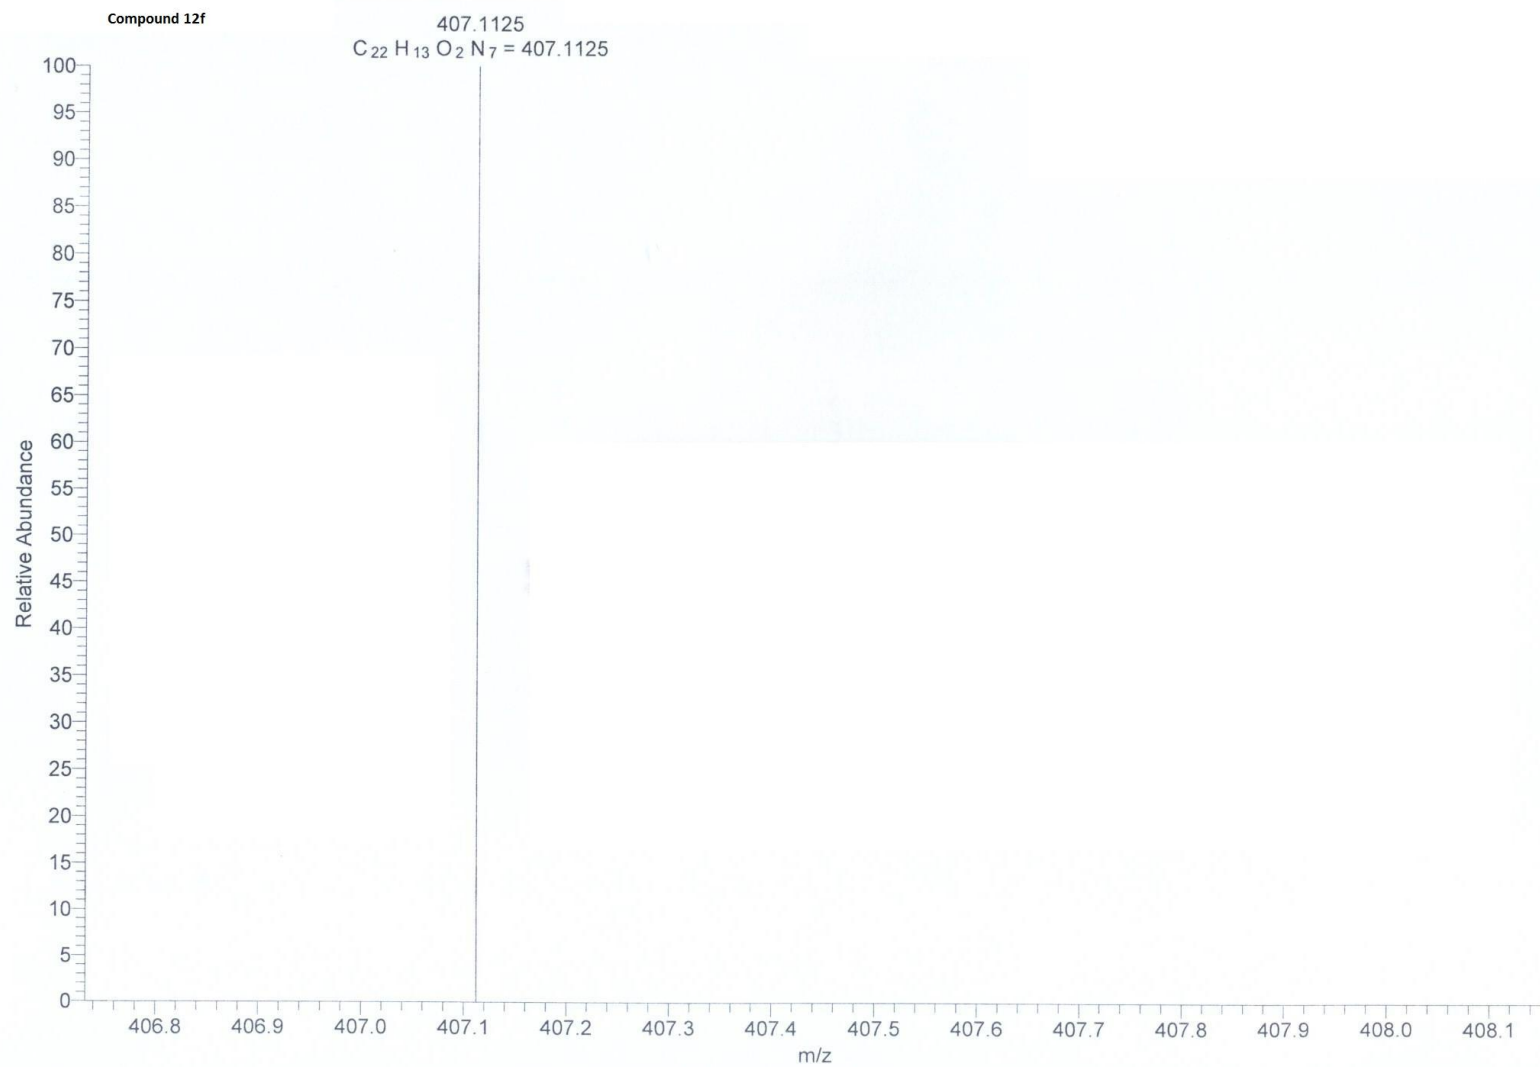

Compound 12g

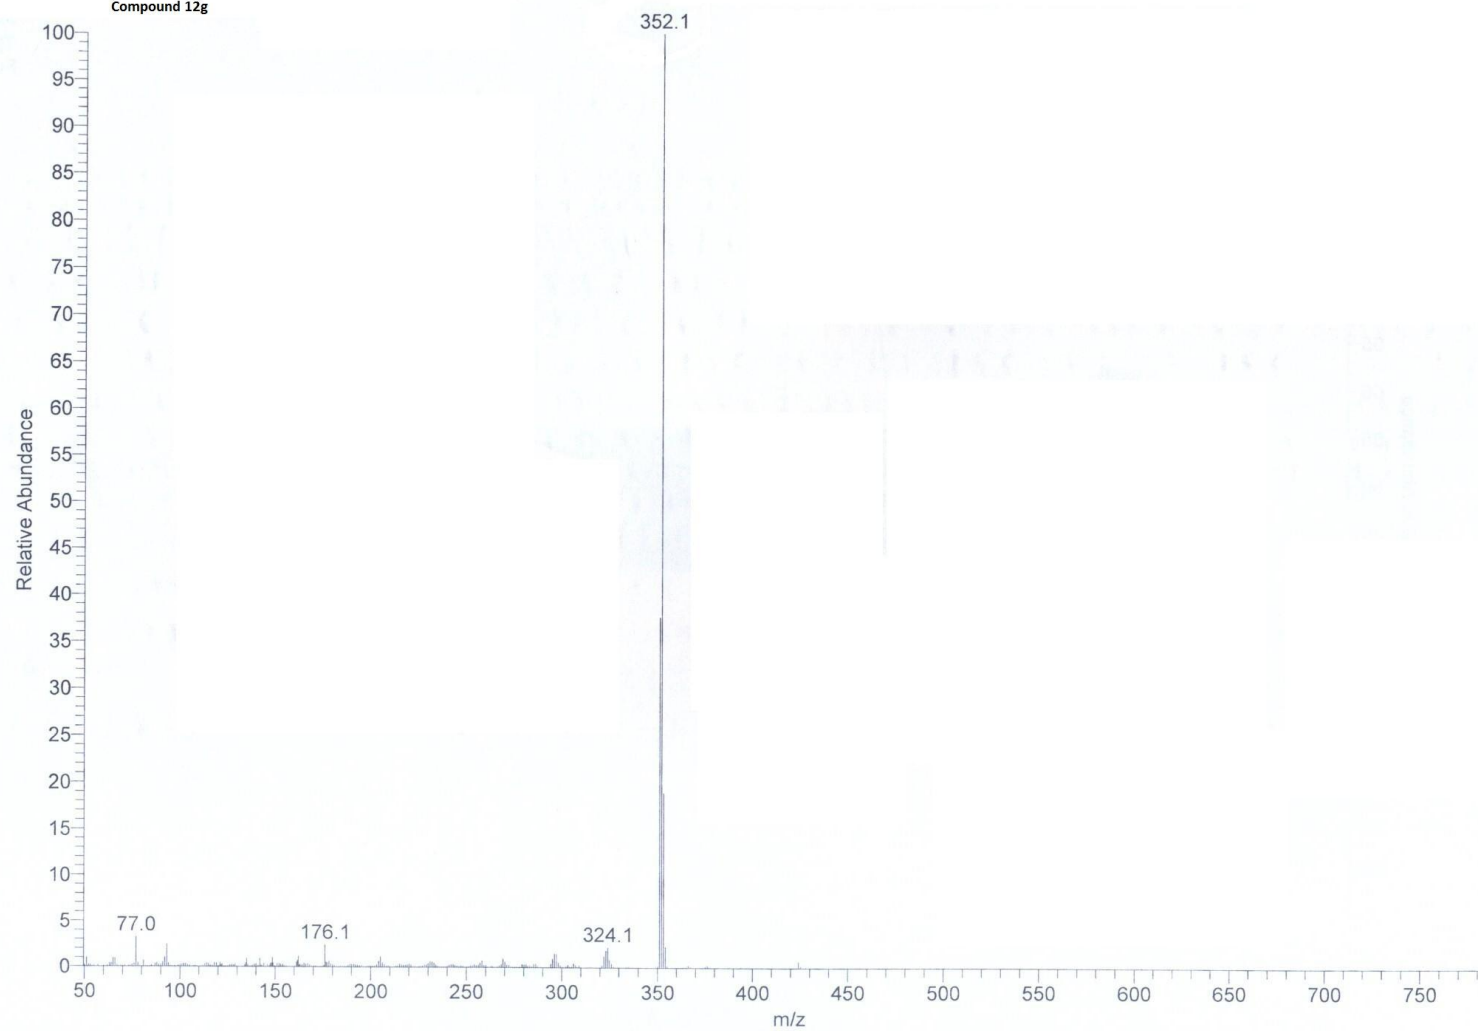

Compound 12g

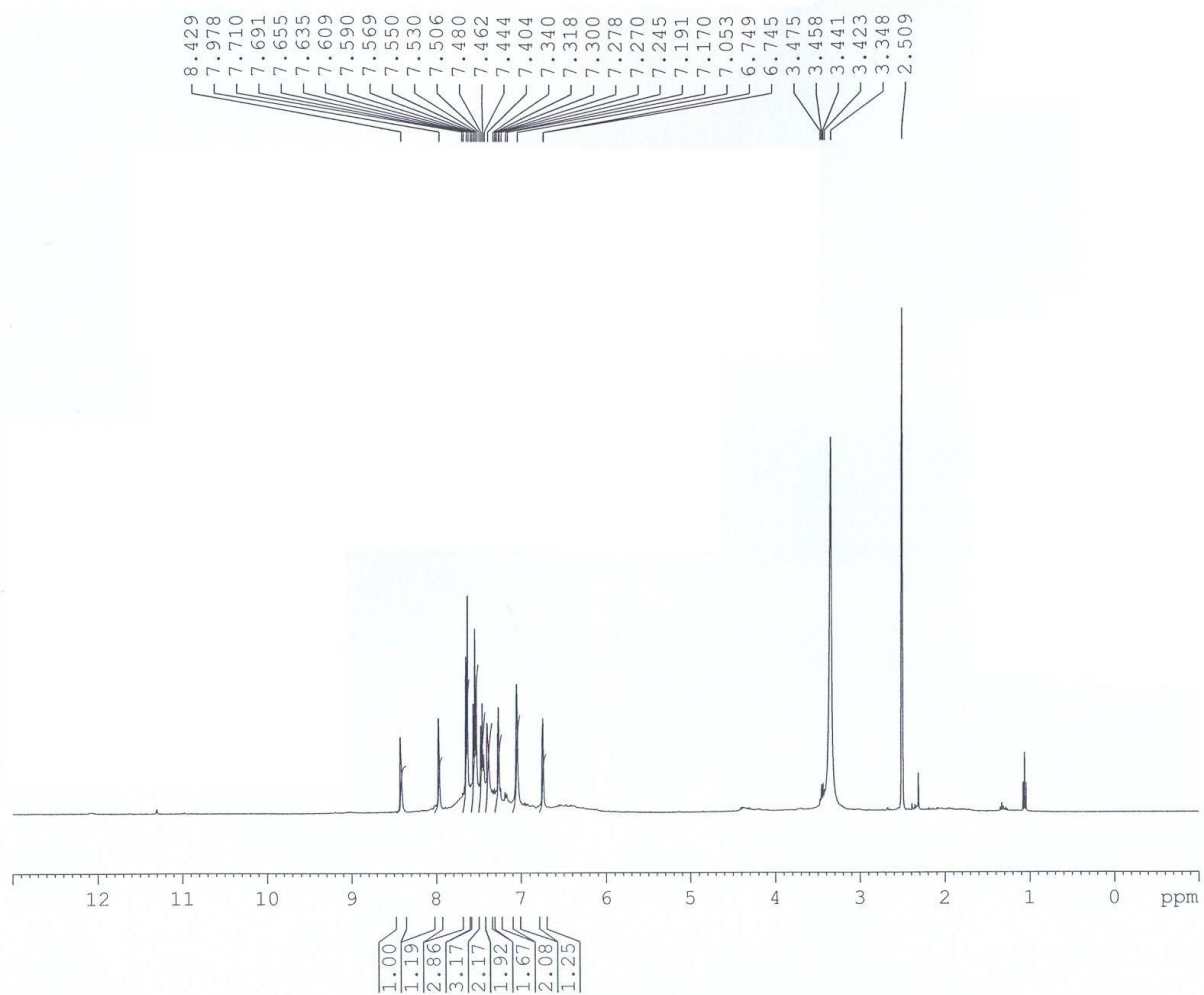

Compound 12g

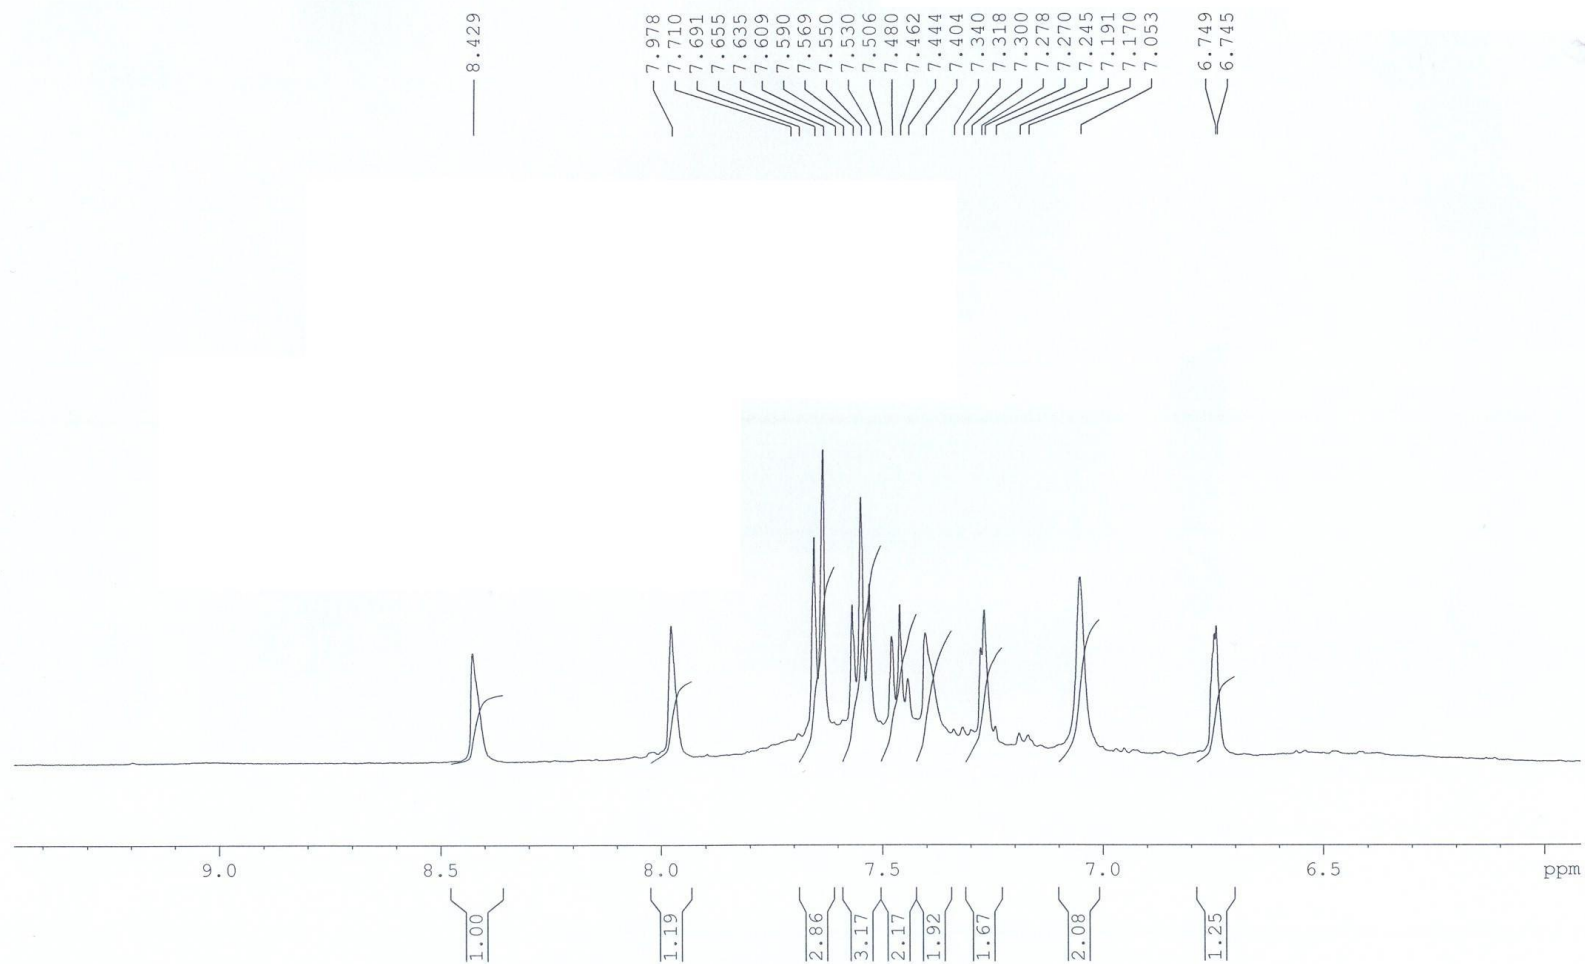

Compound 12g

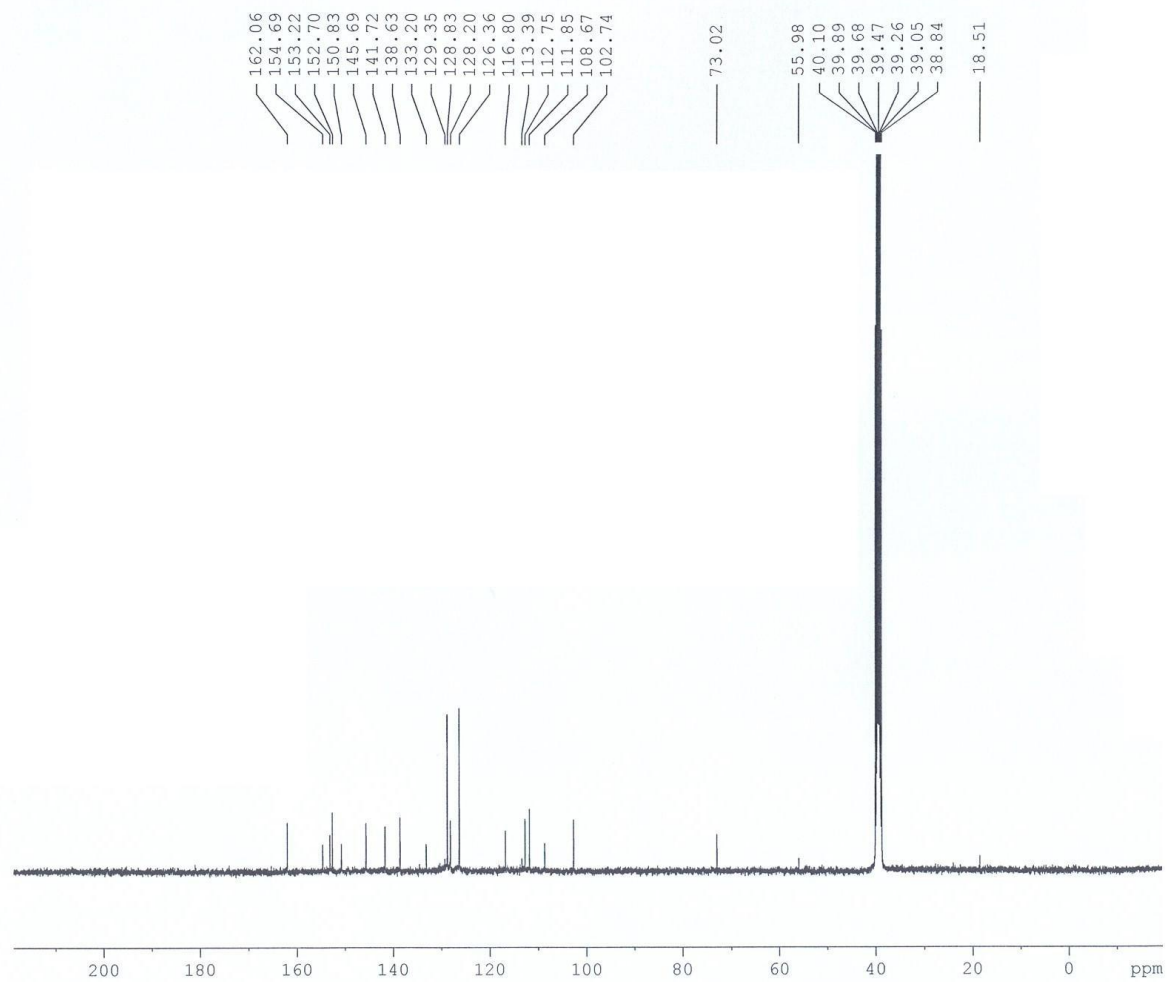

Compound 12g

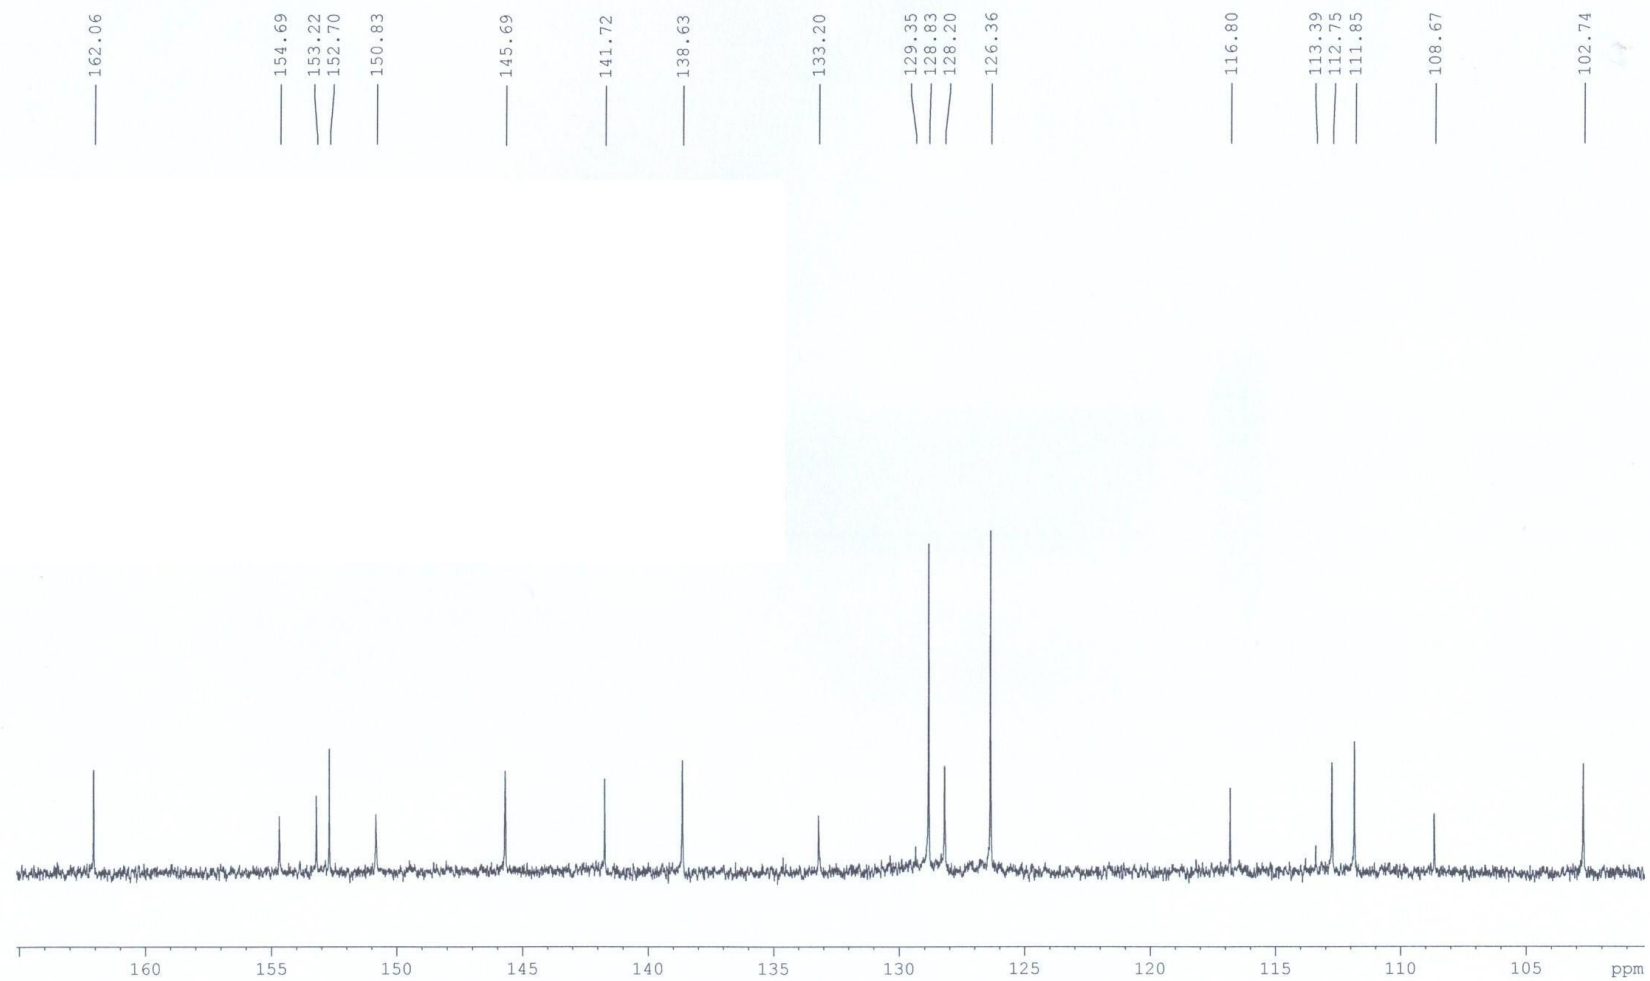

Compound 12g

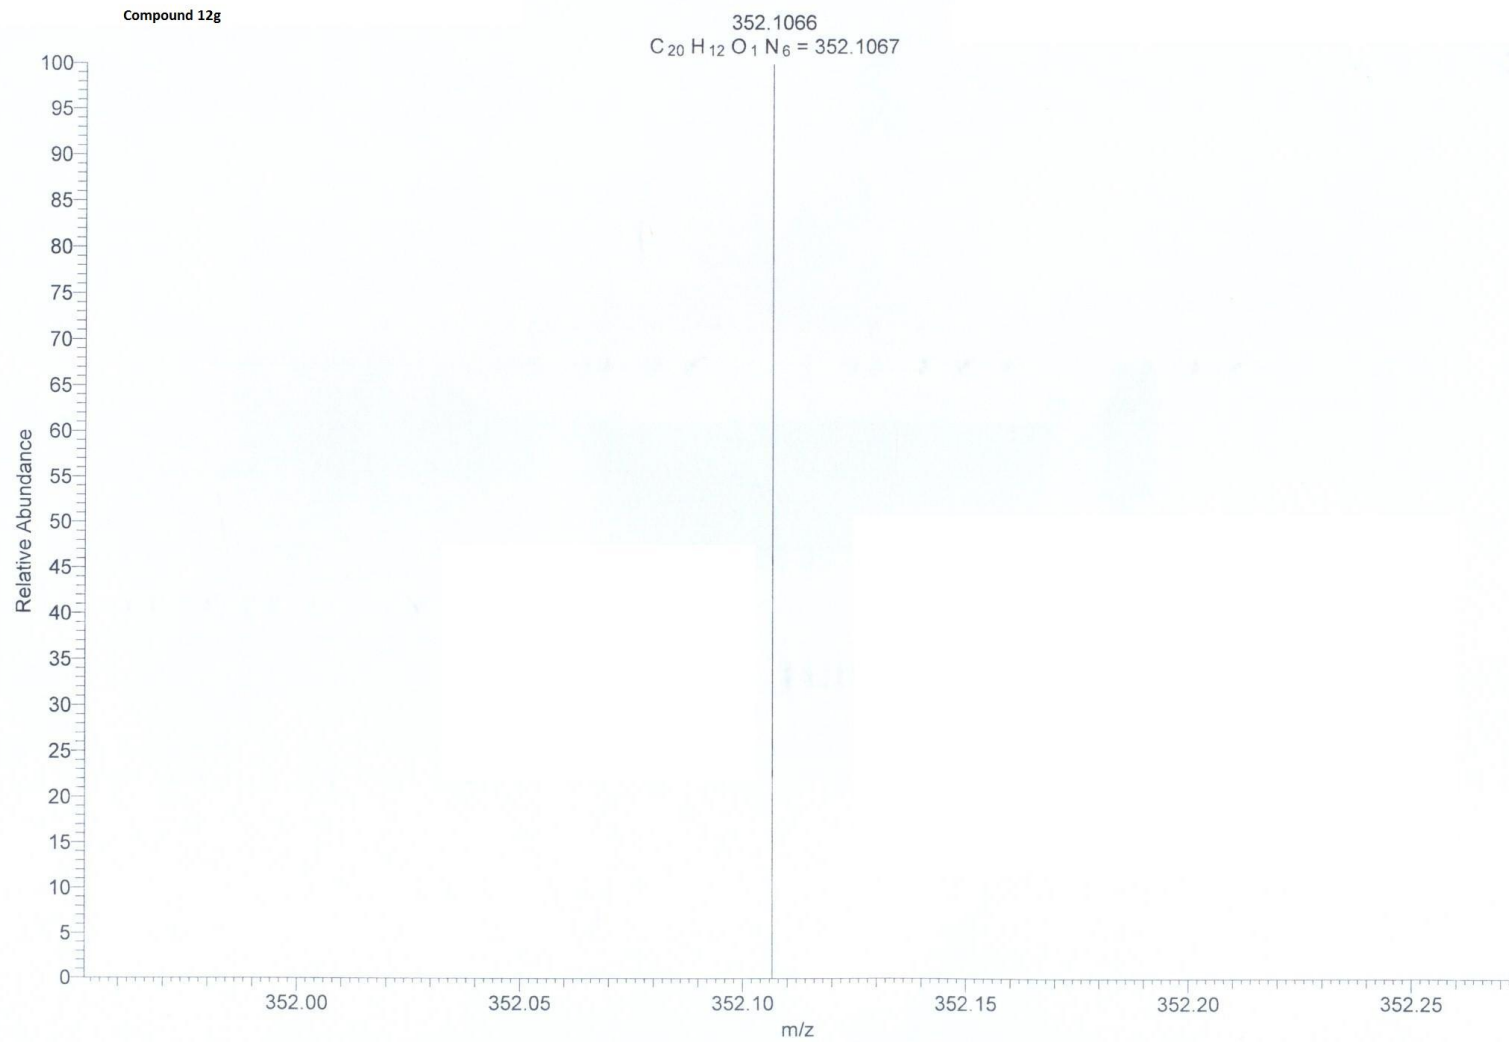



Compound 12h

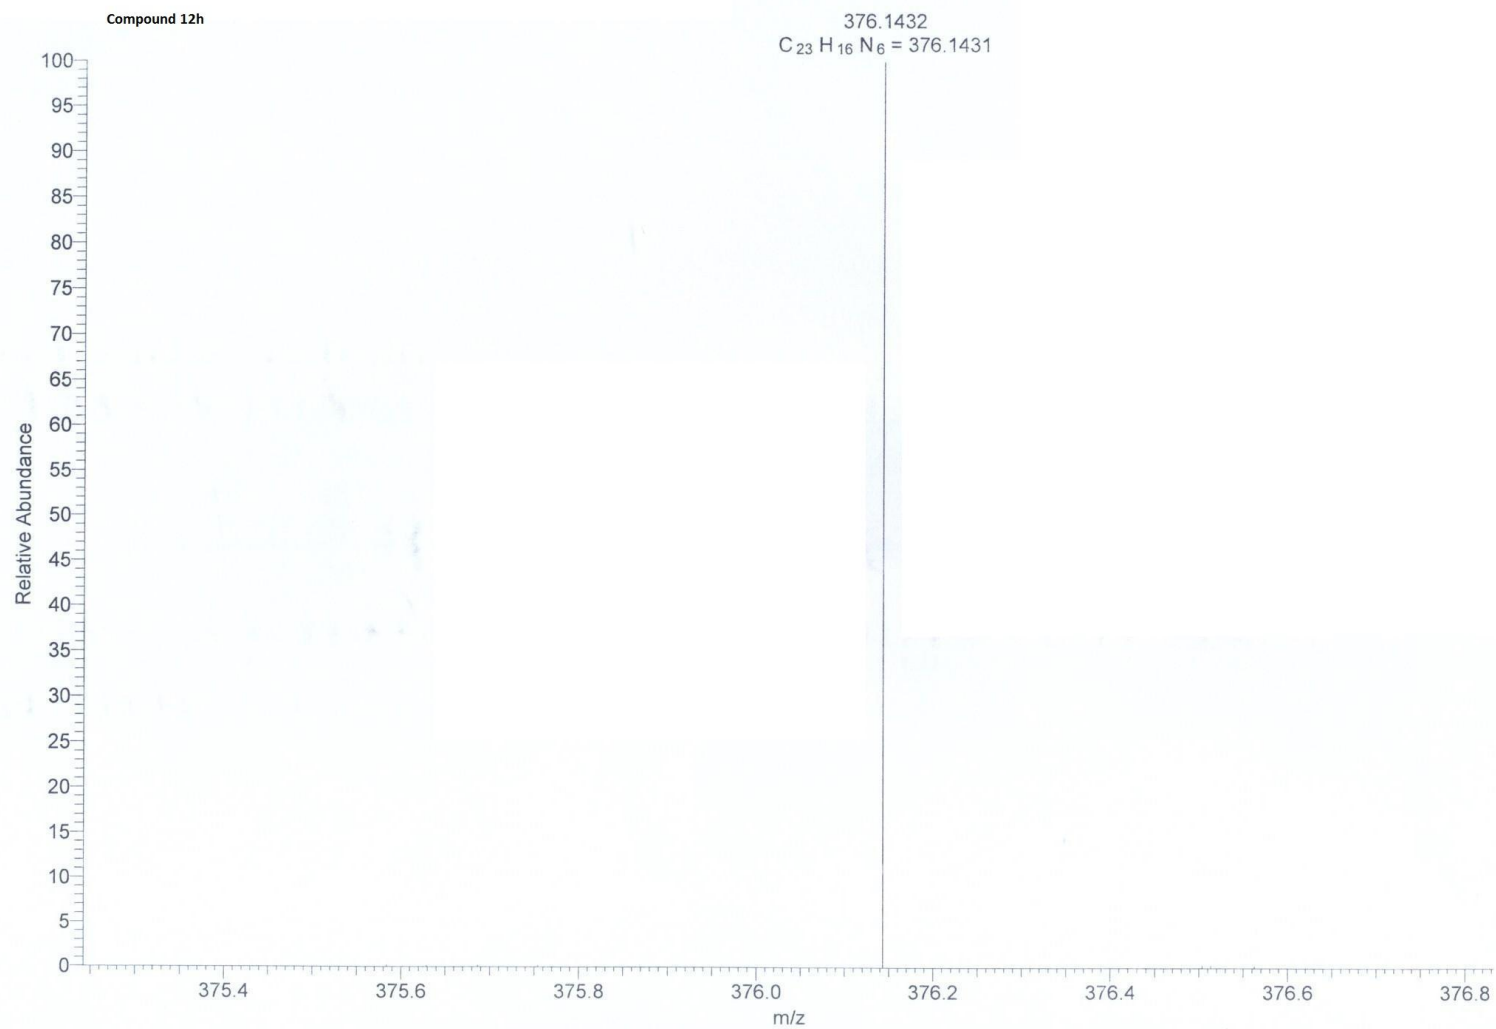

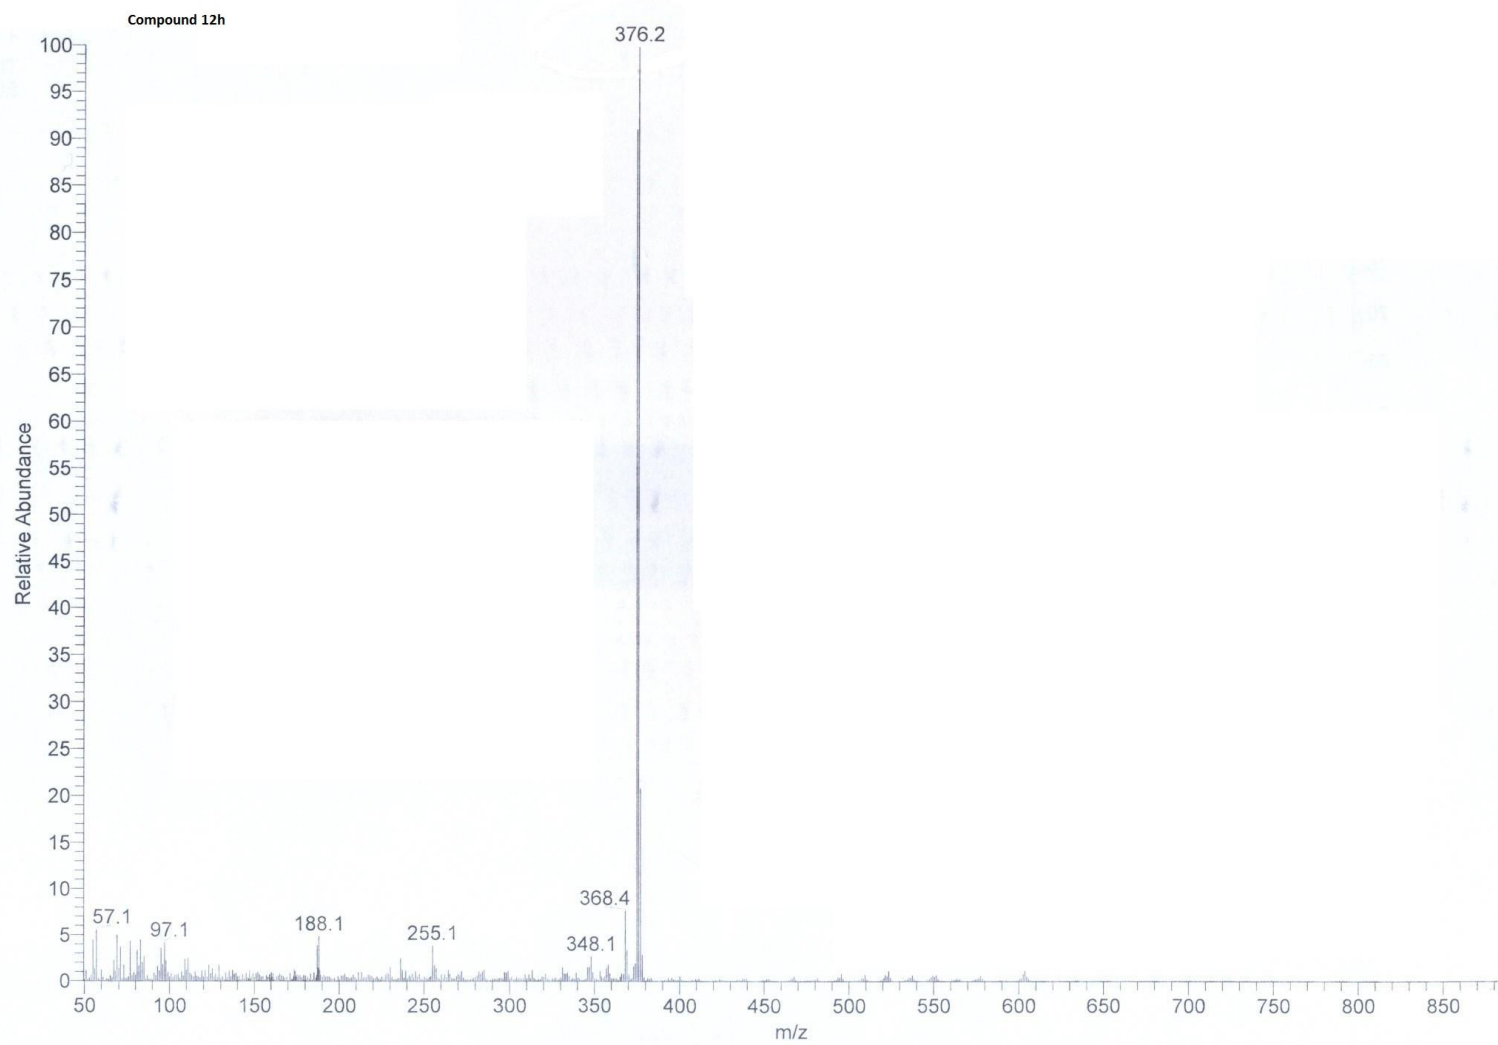

Compound 12h

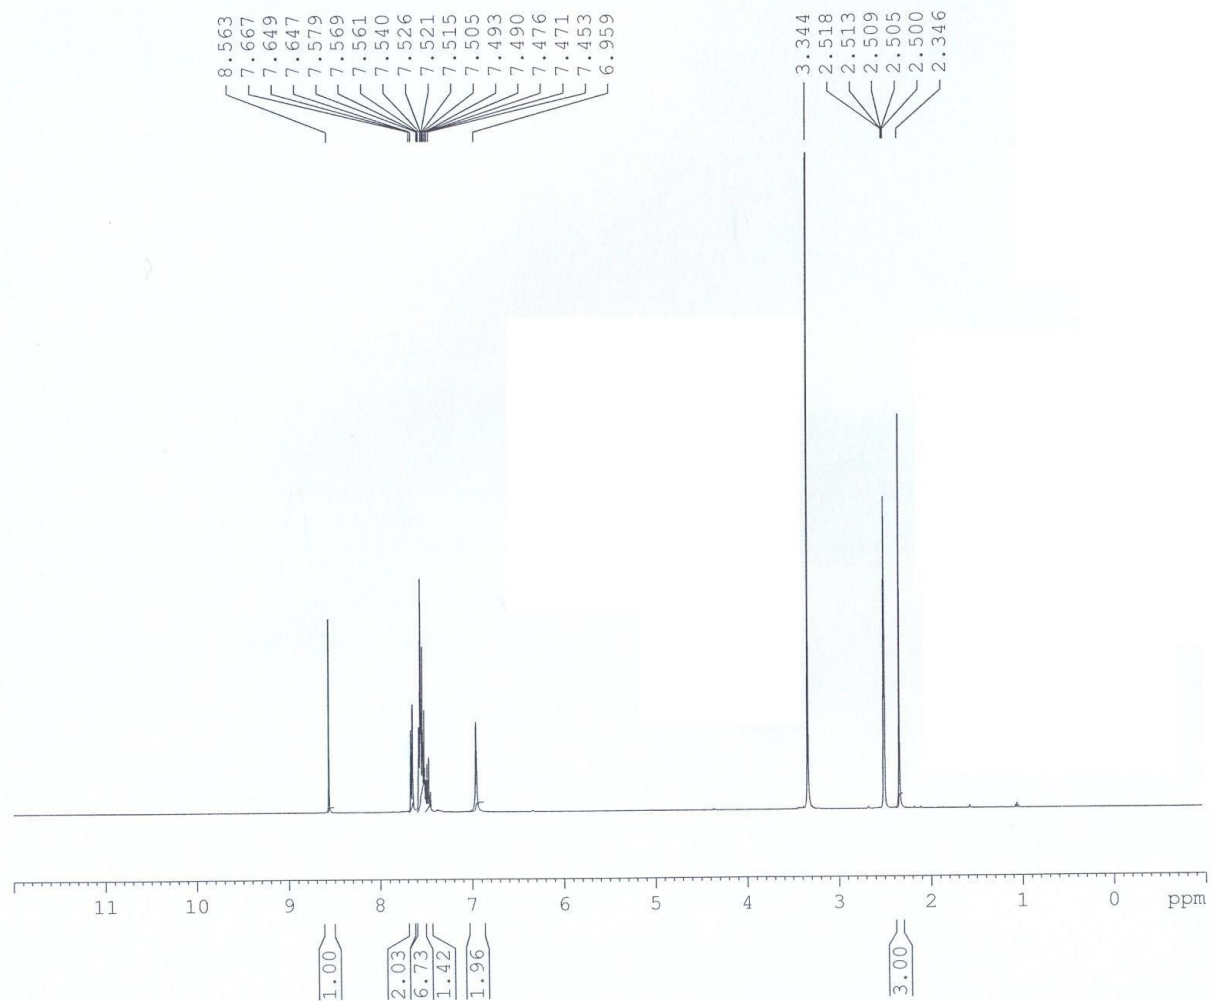

Compound 12h

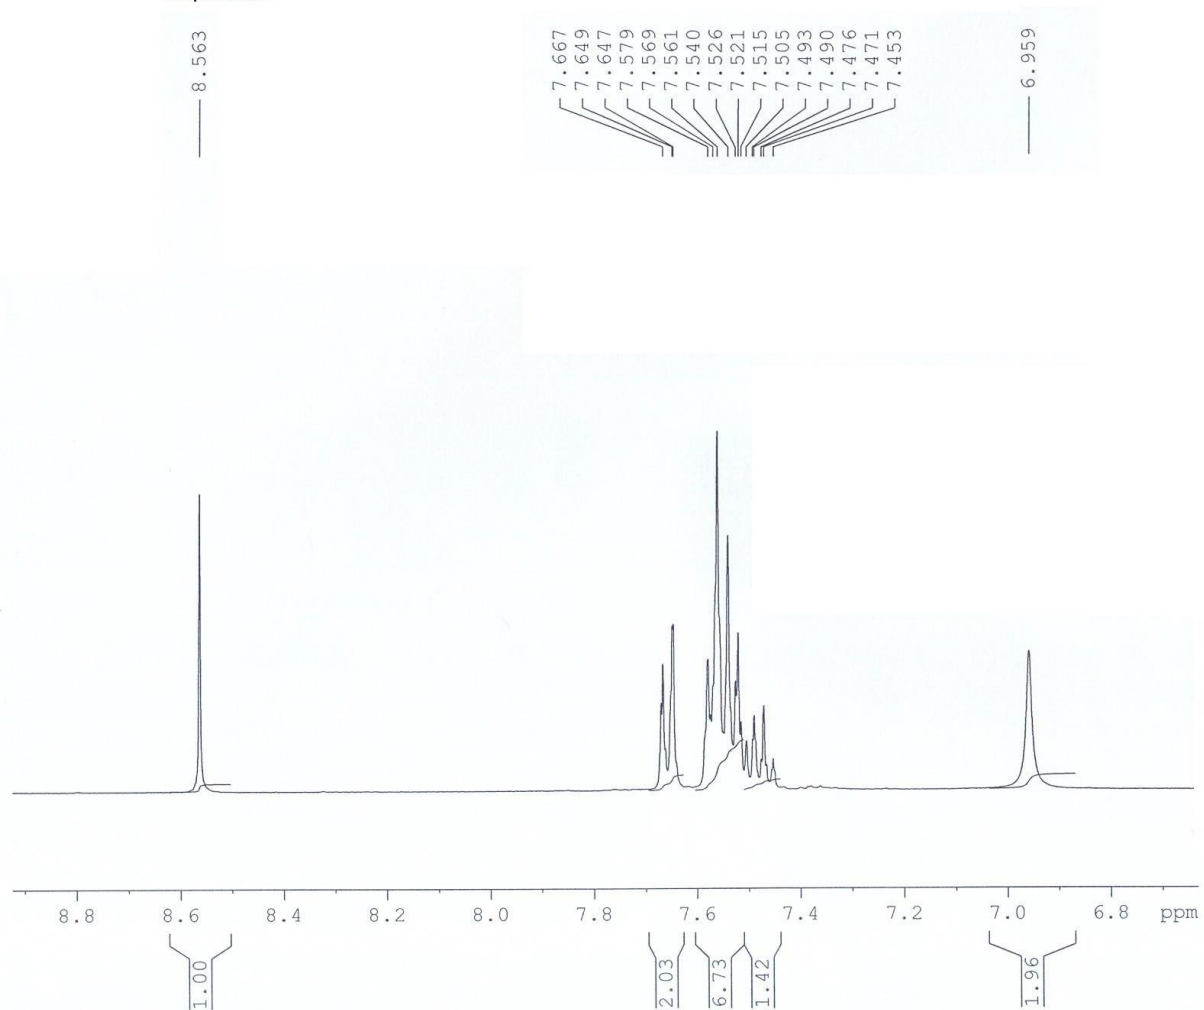

Compound 12h

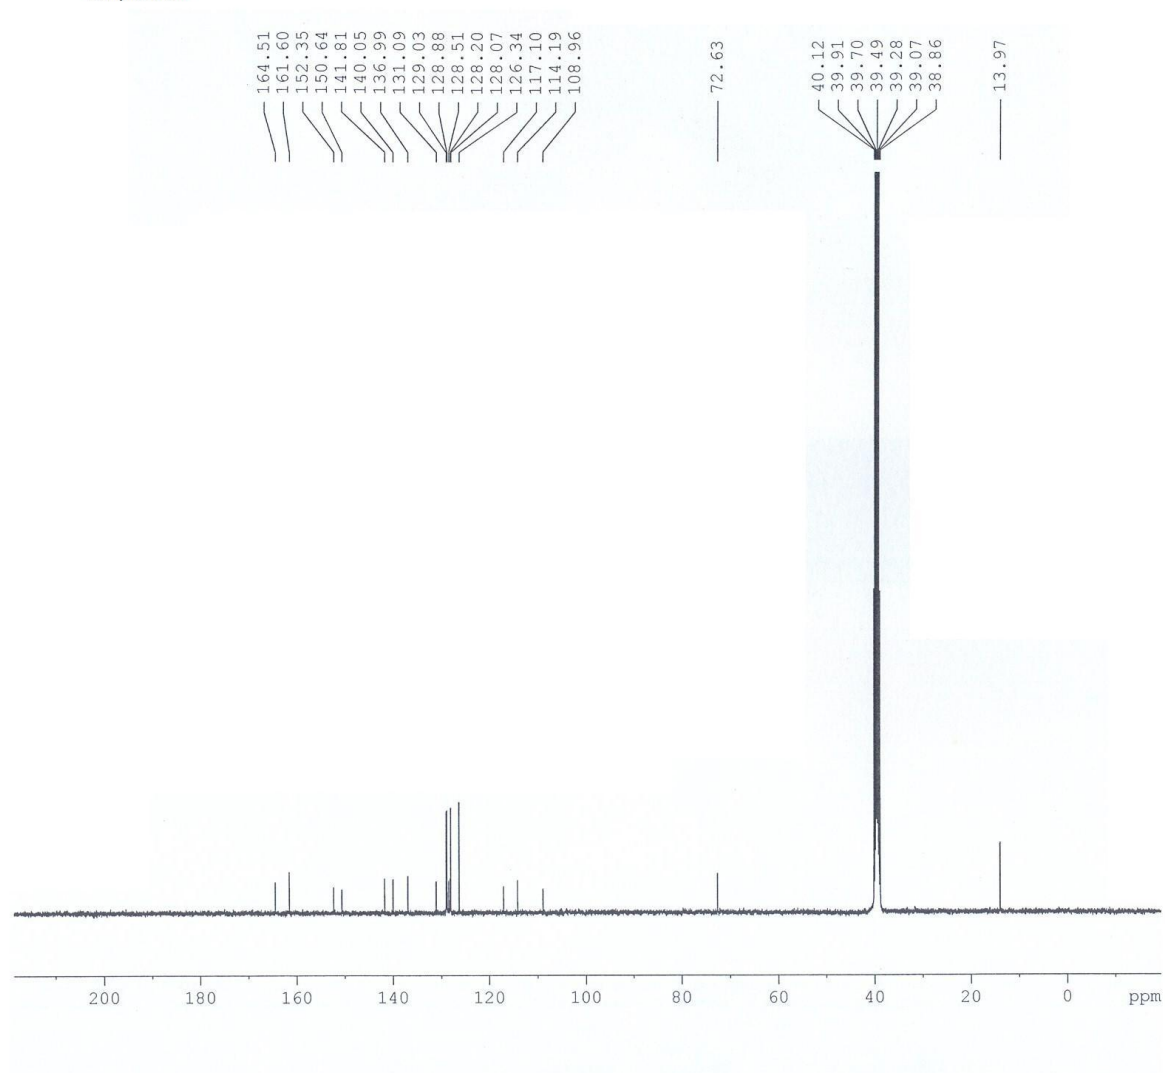

Compound 12h

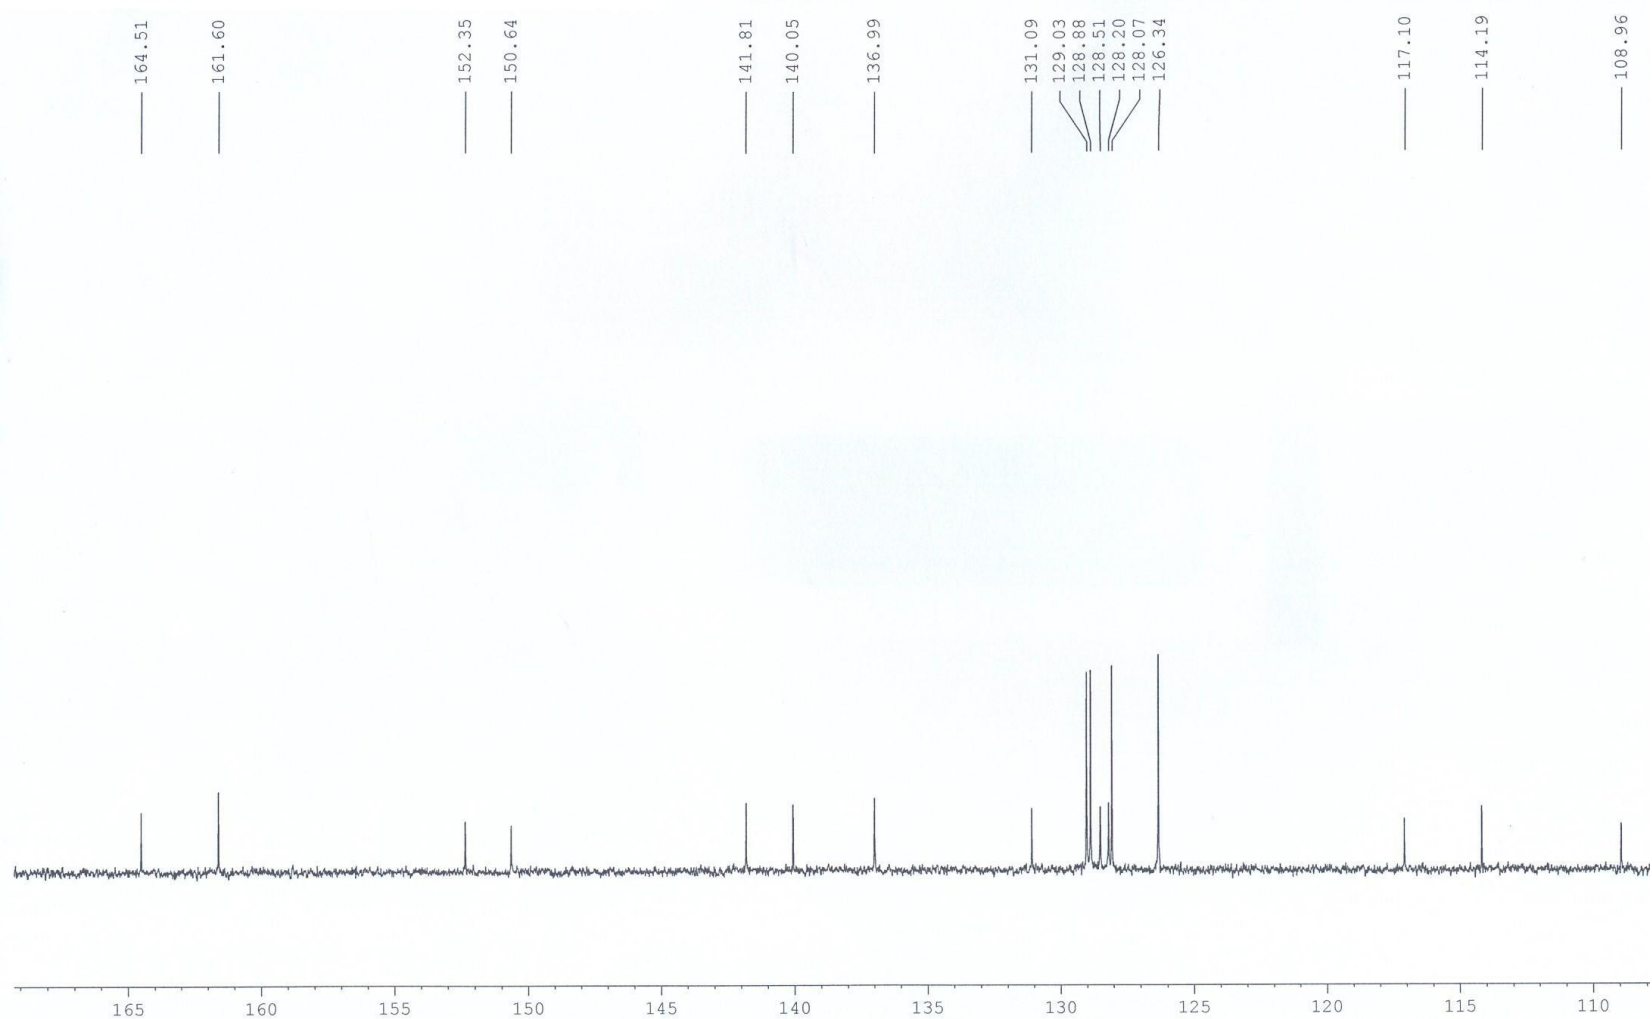

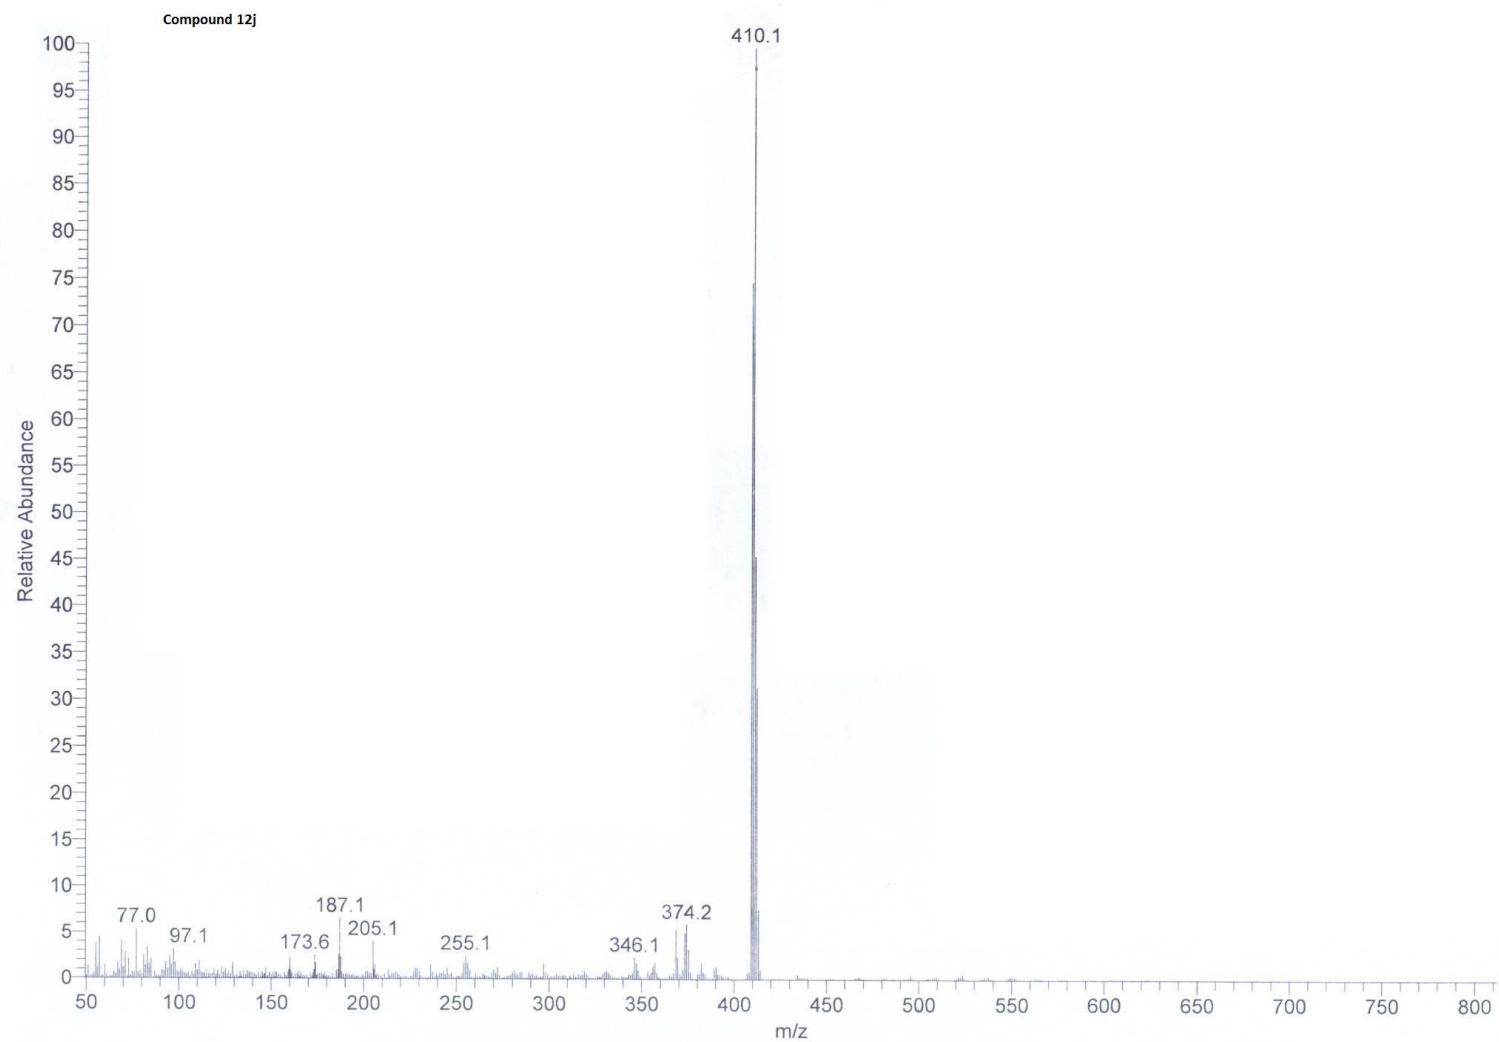

Compound 12j

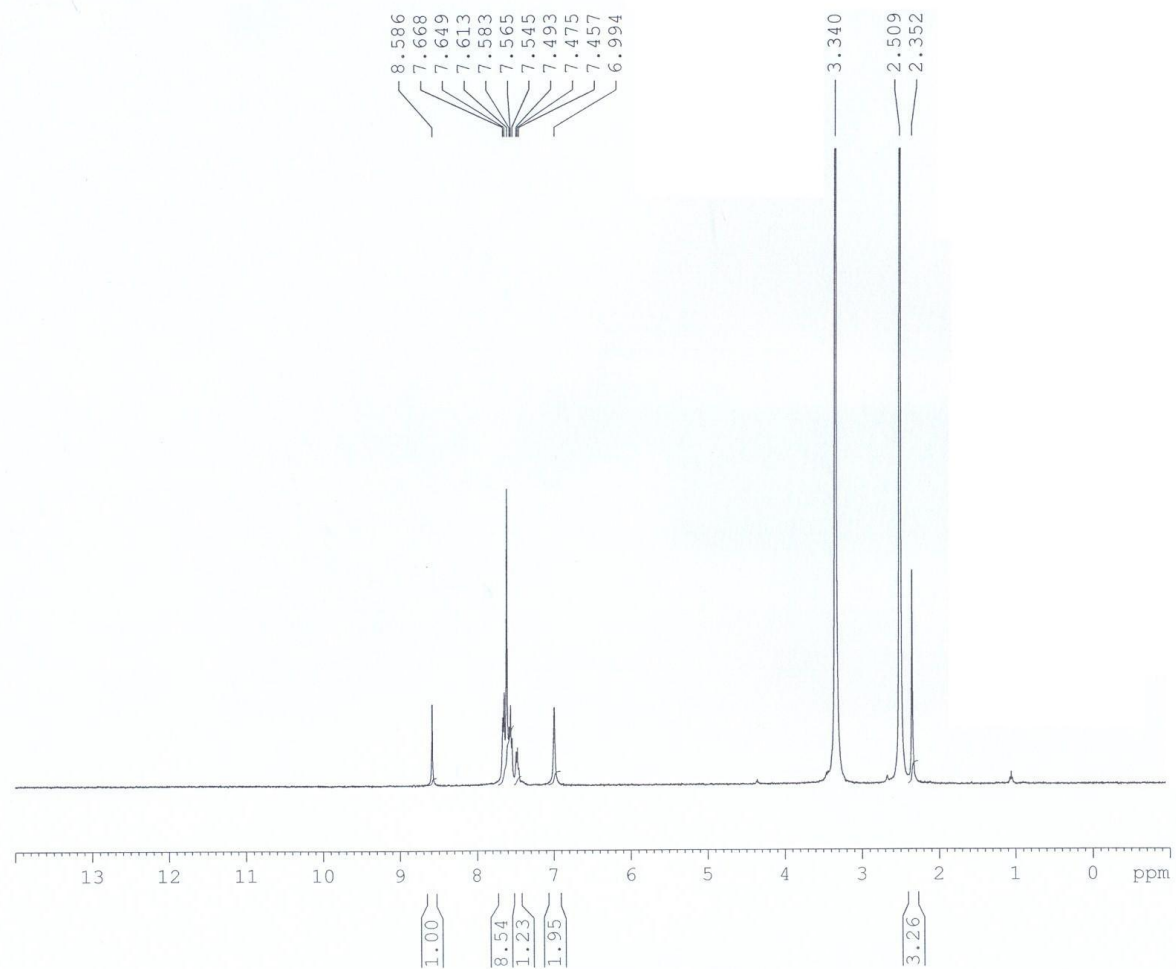



Compound 12j

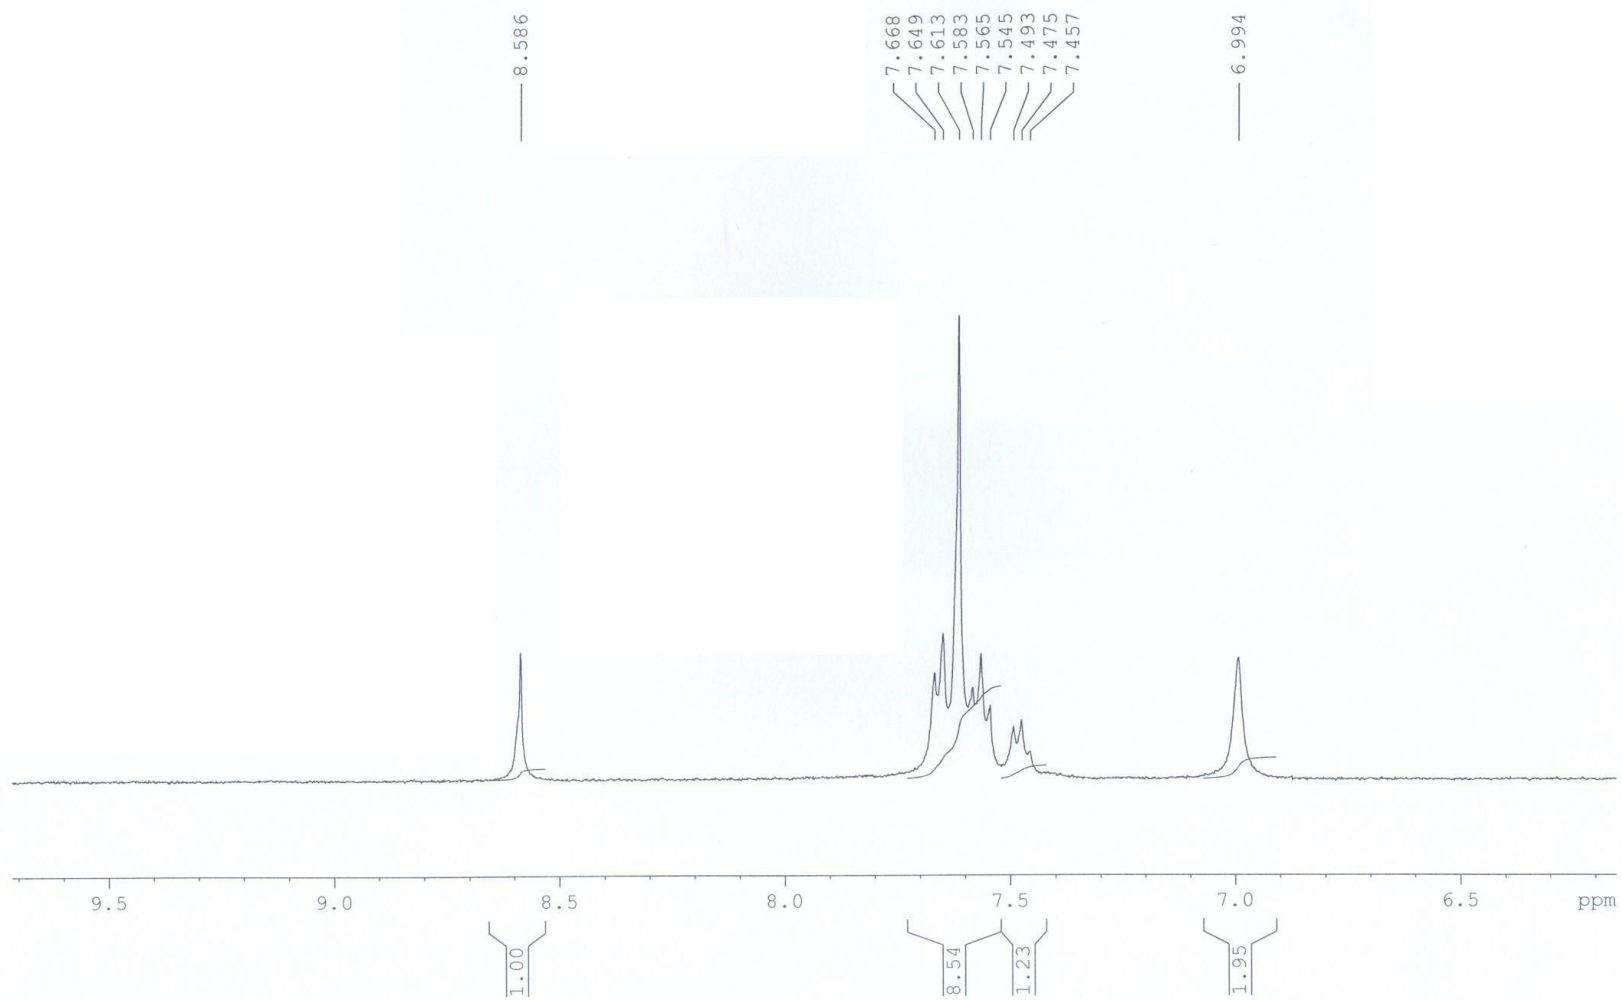

Compound 12j

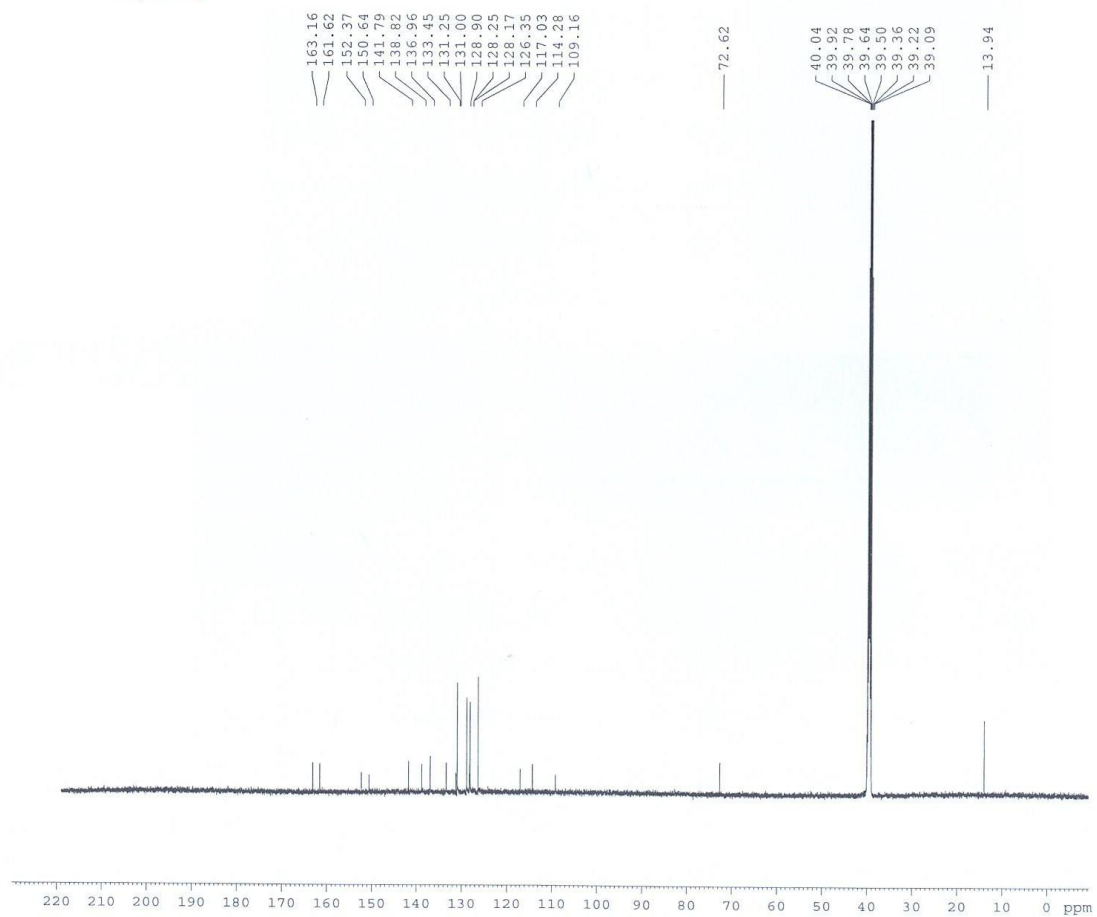

Compound 12j

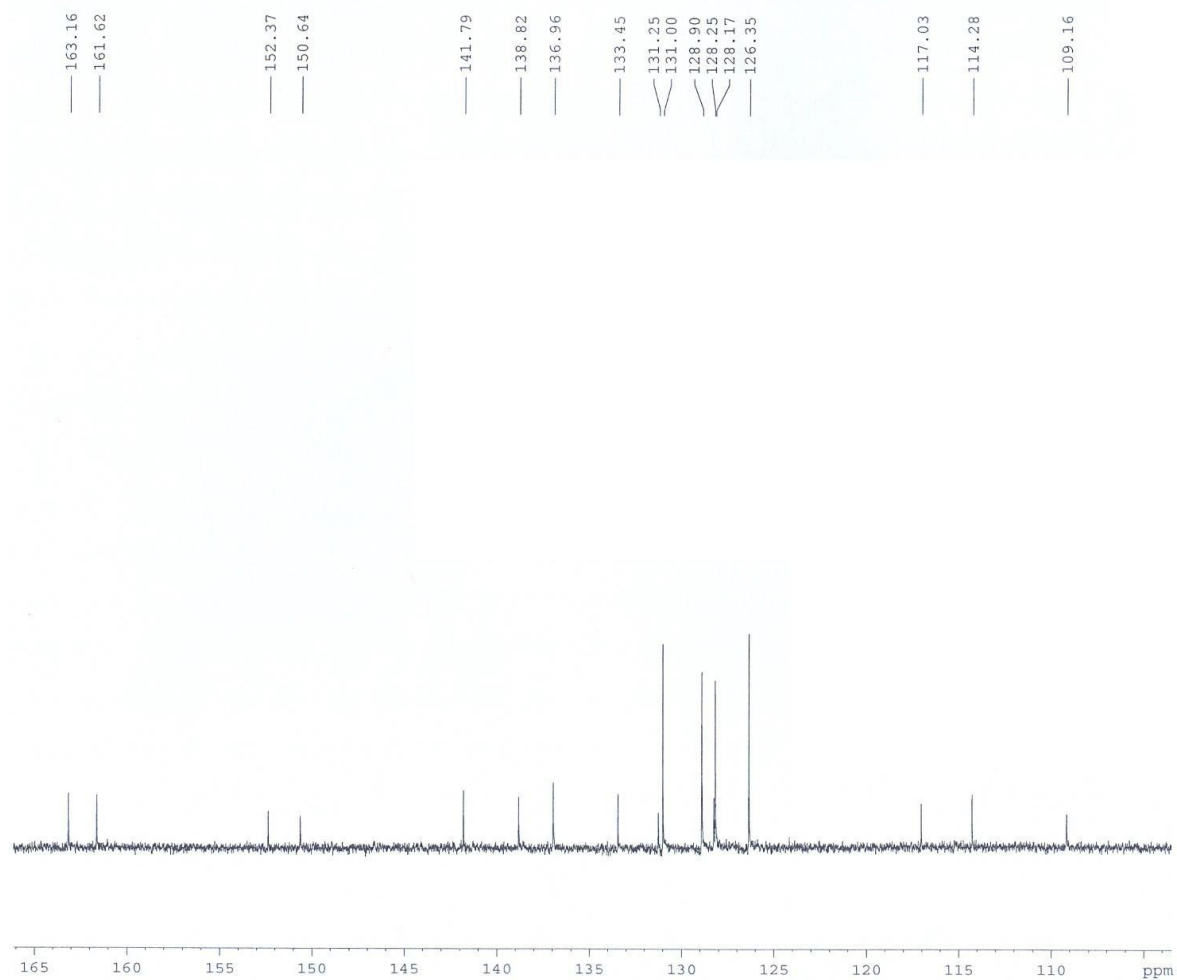

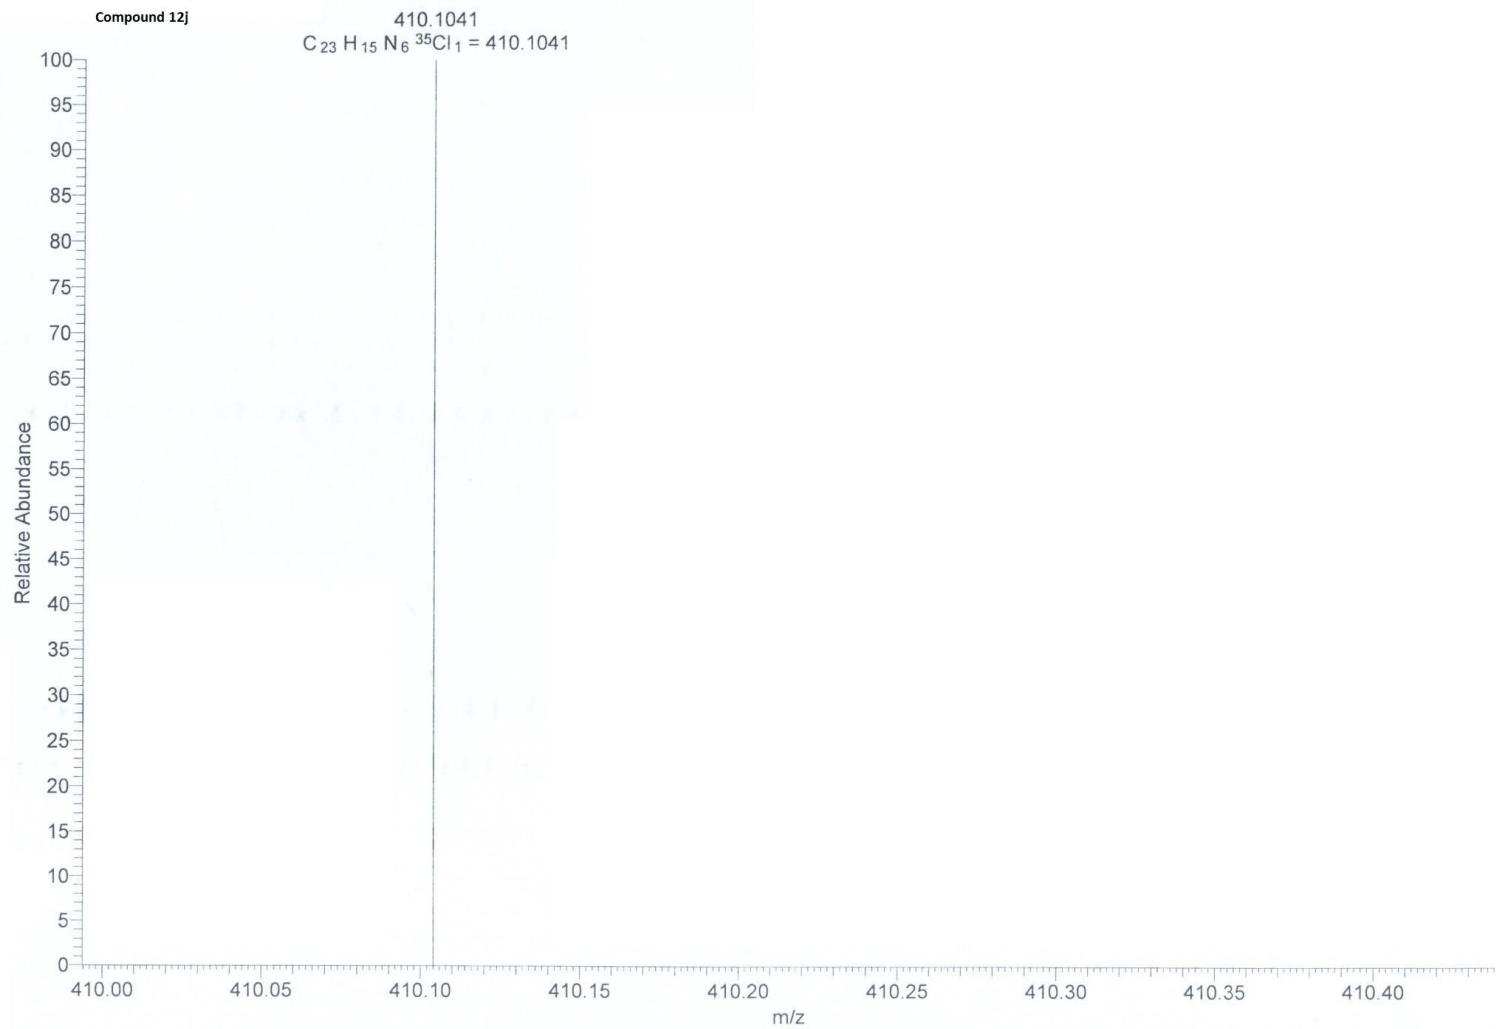



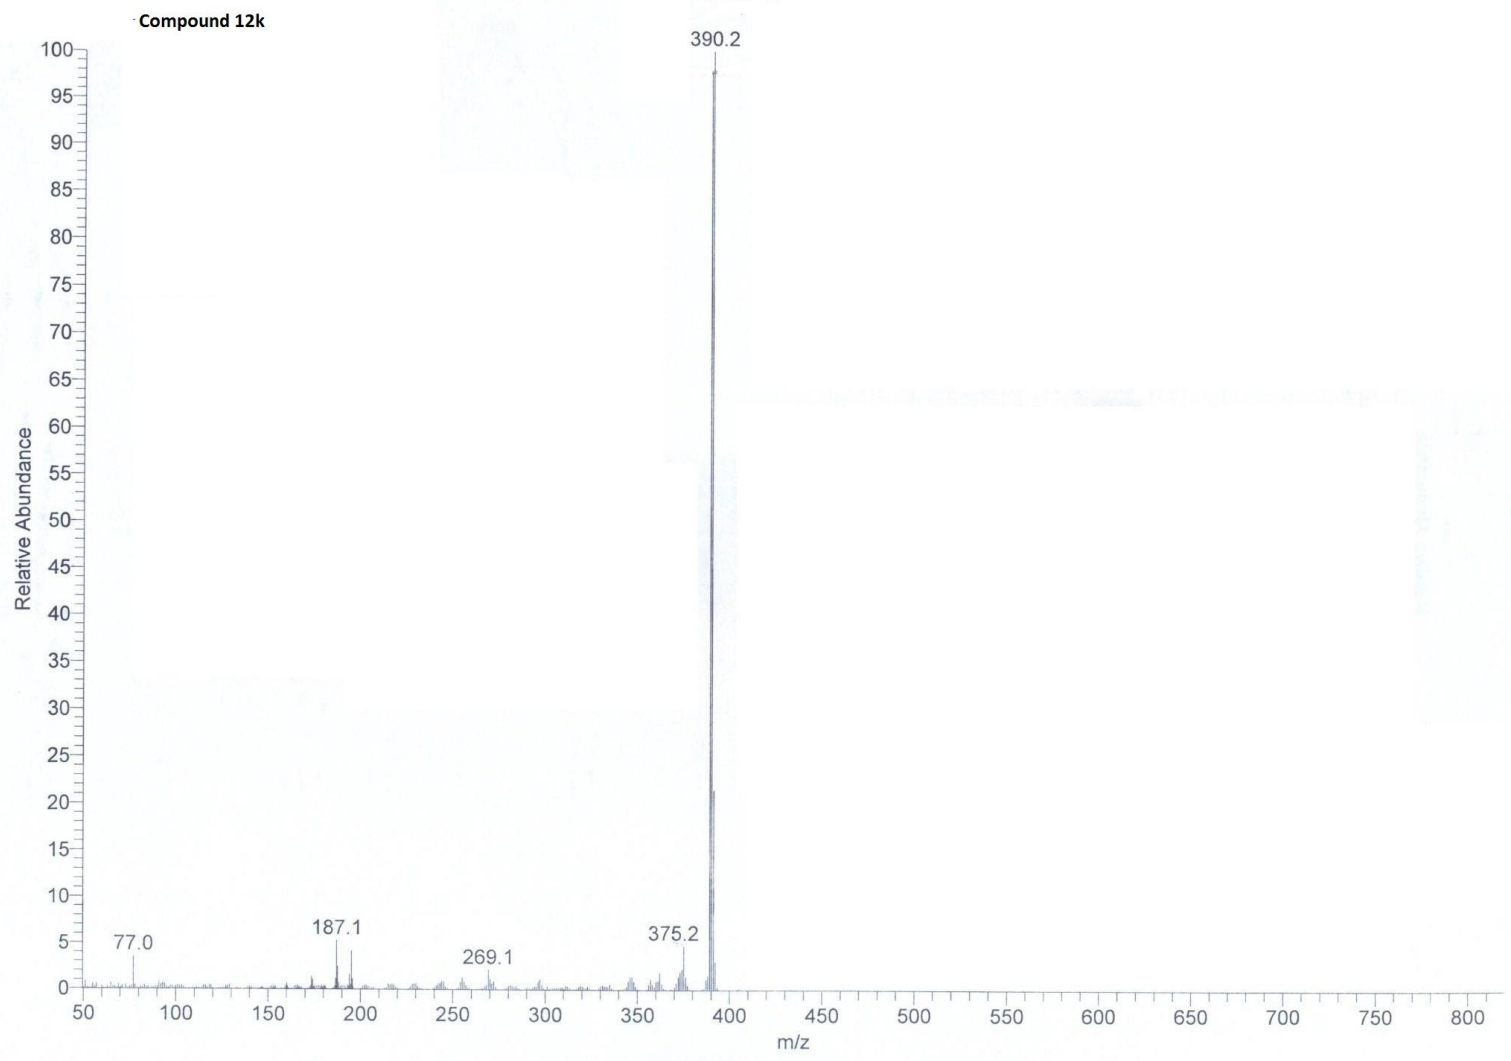

Compound 12k

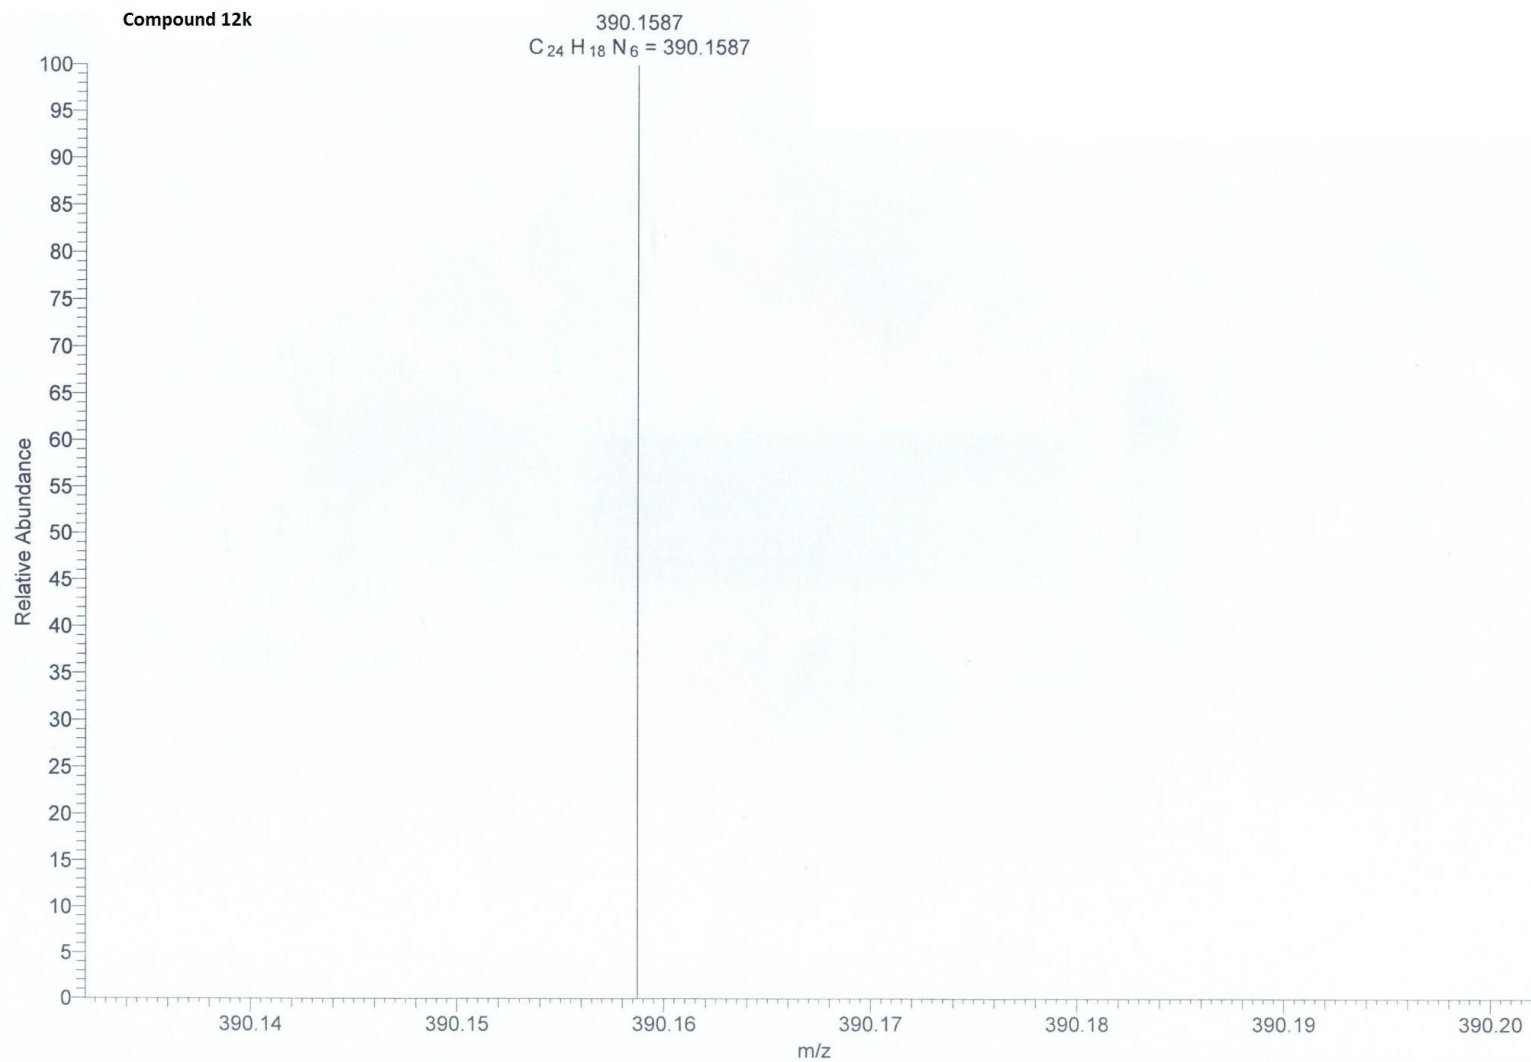

Compound 12k

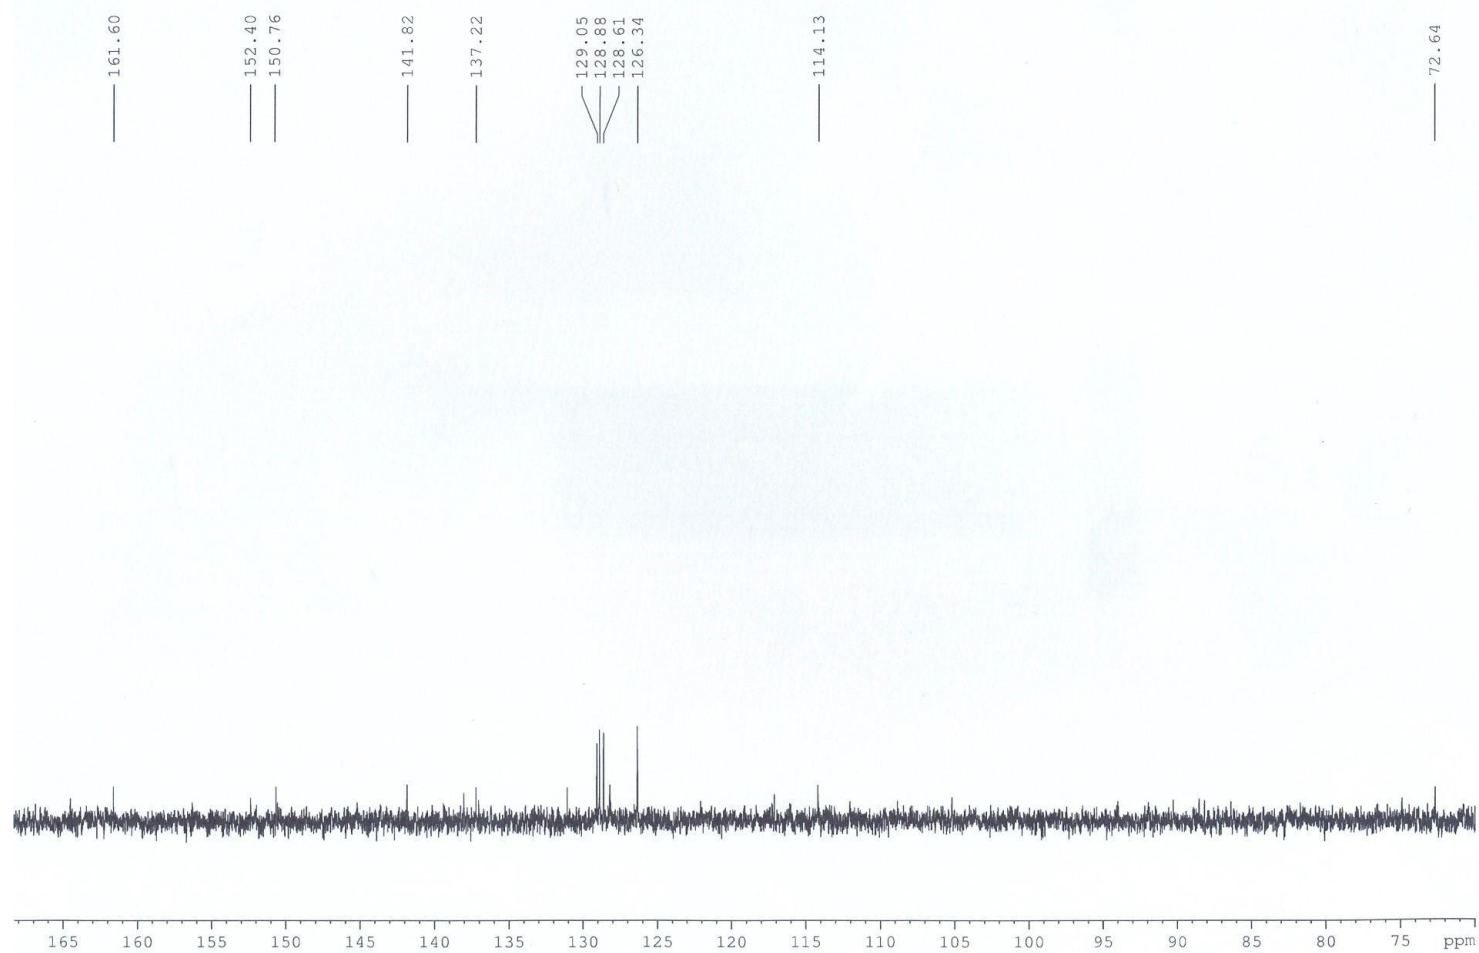



Compound 12k

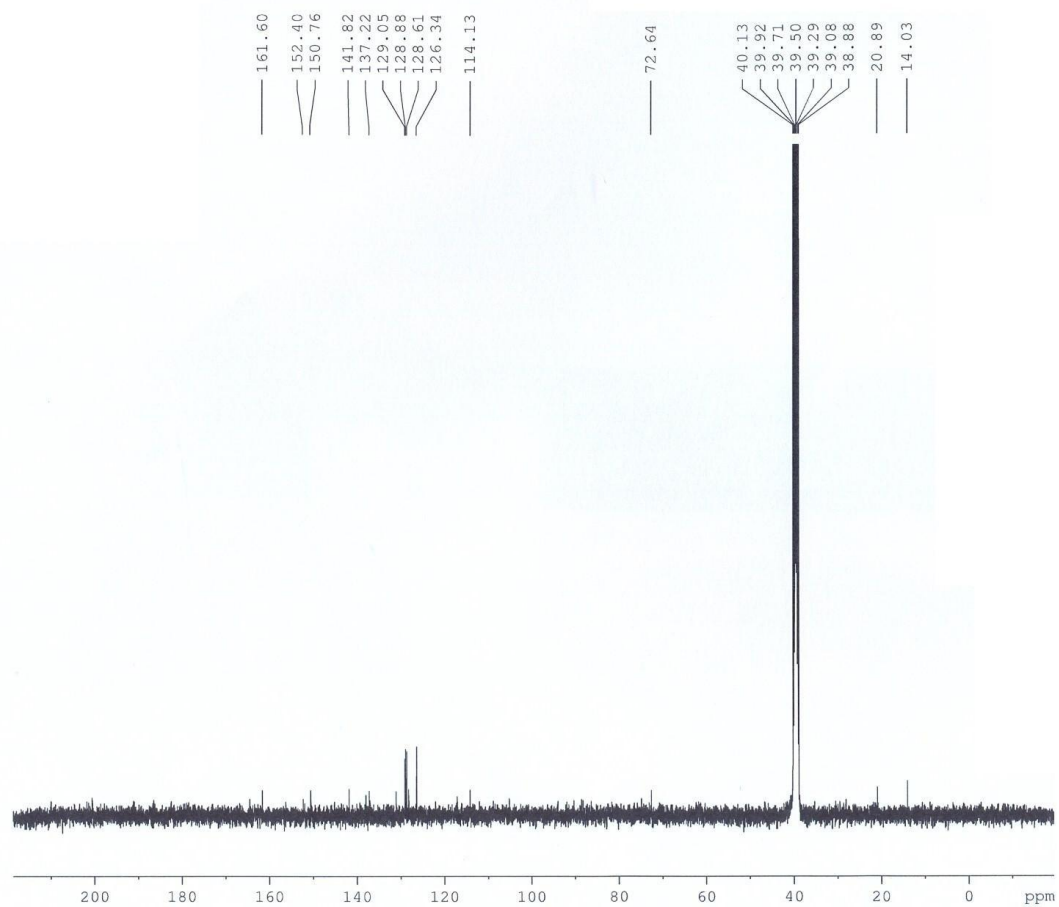

Compound 12k

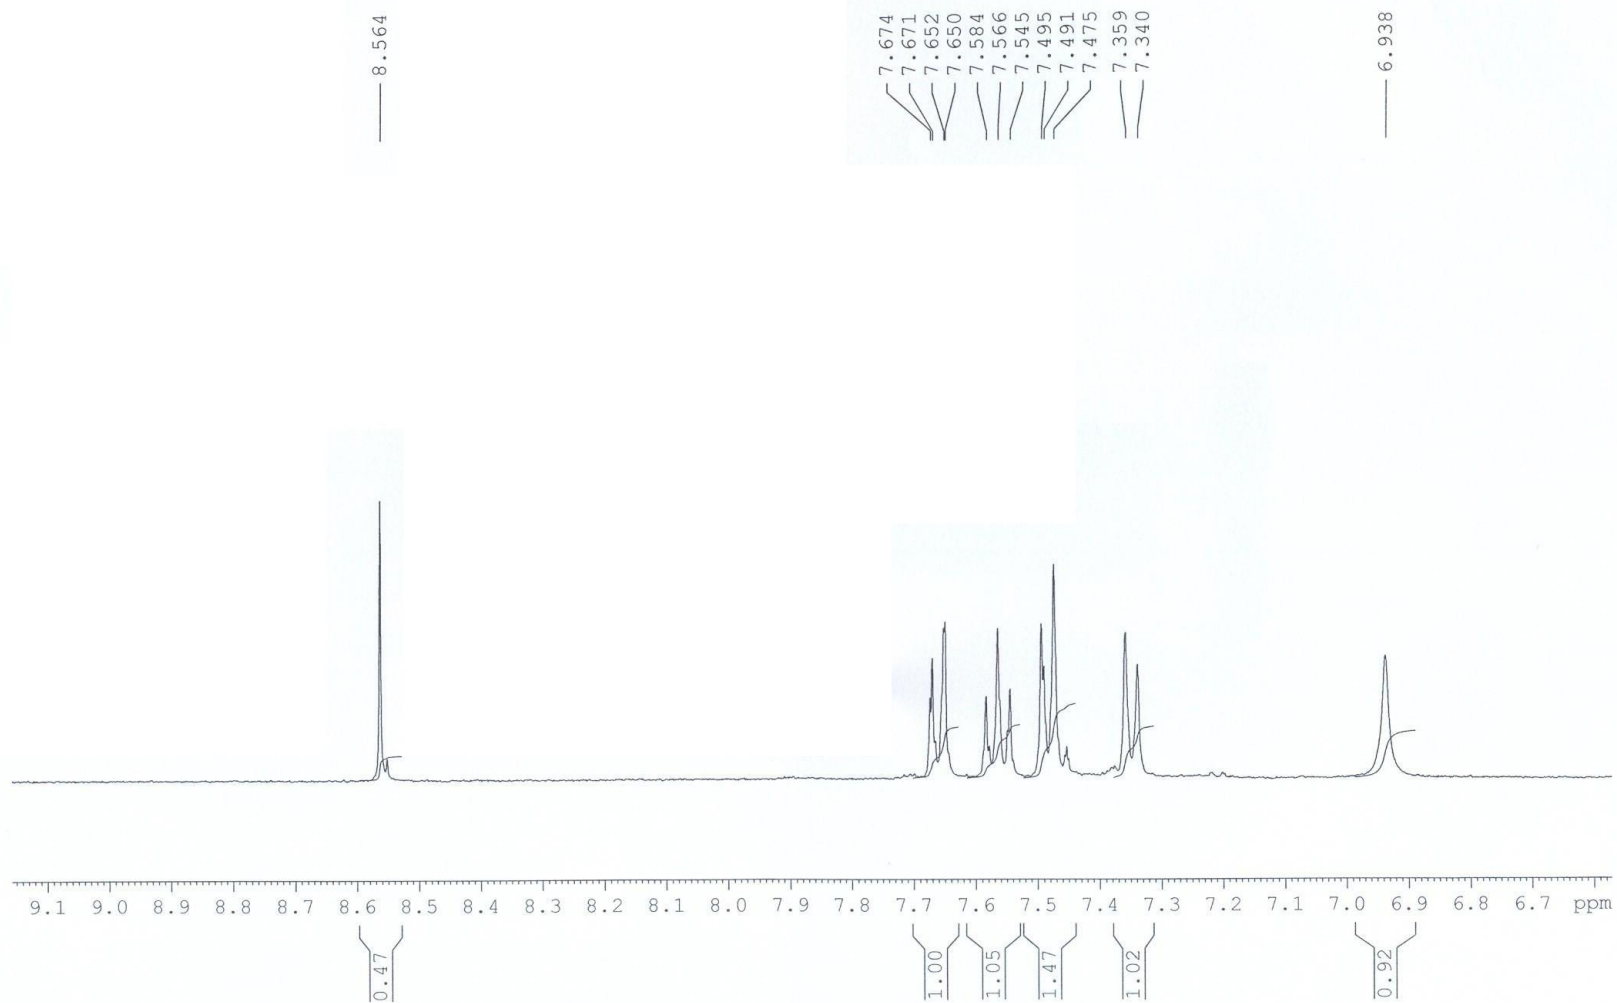

Compound 12k

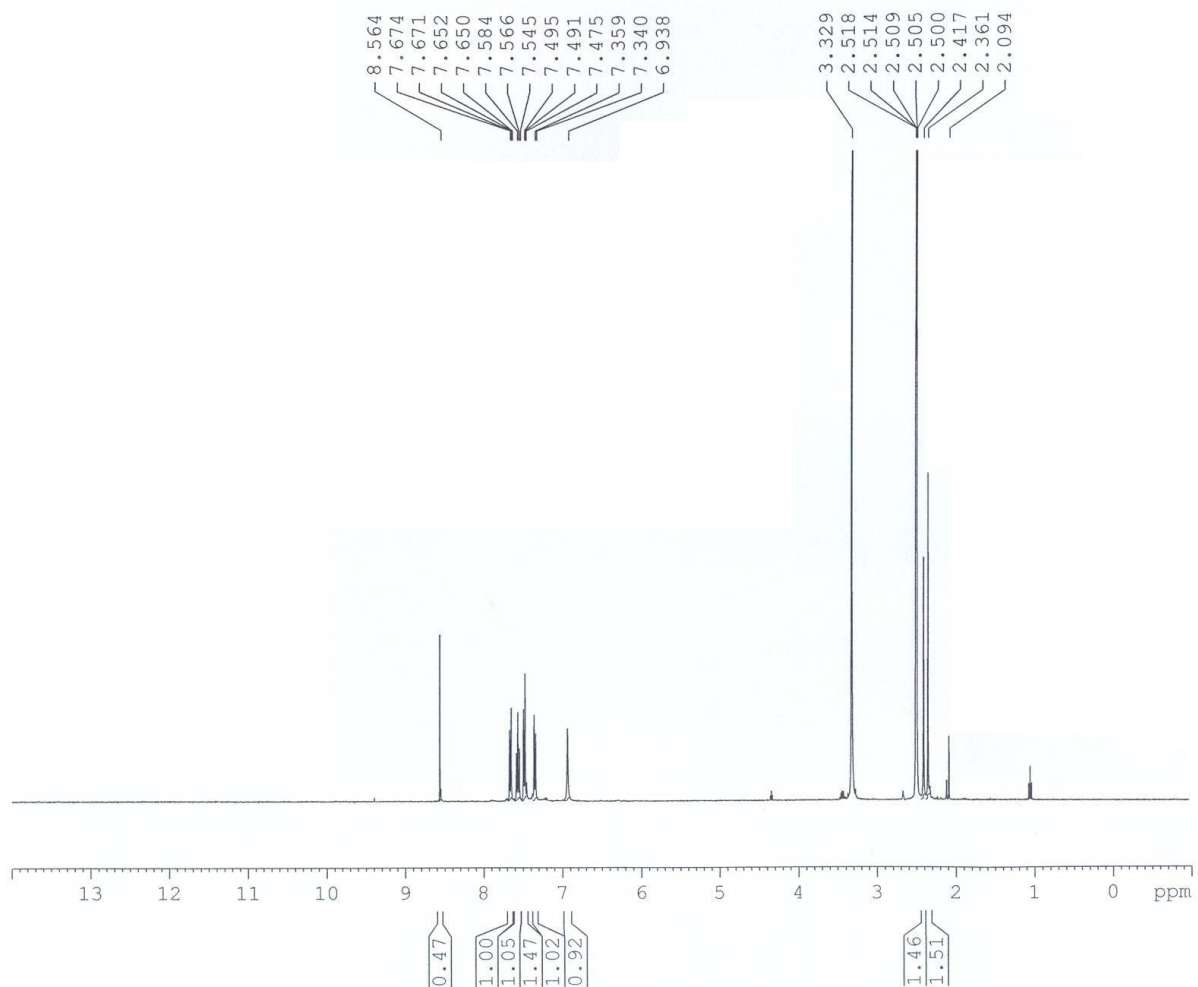

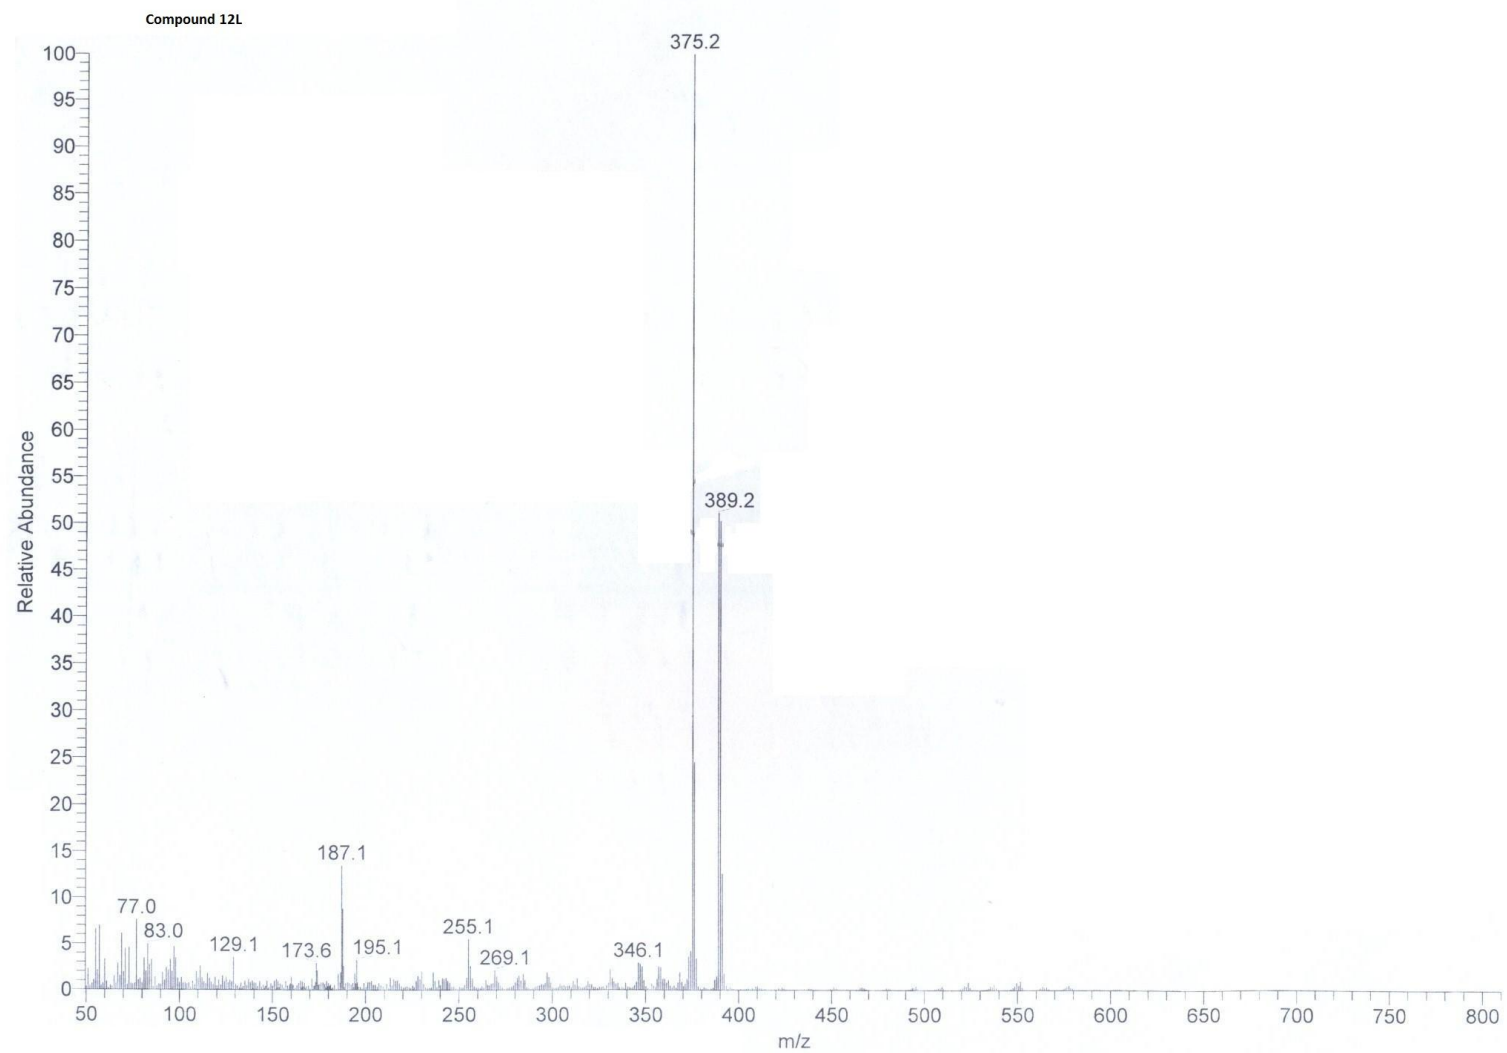

Compound 12L

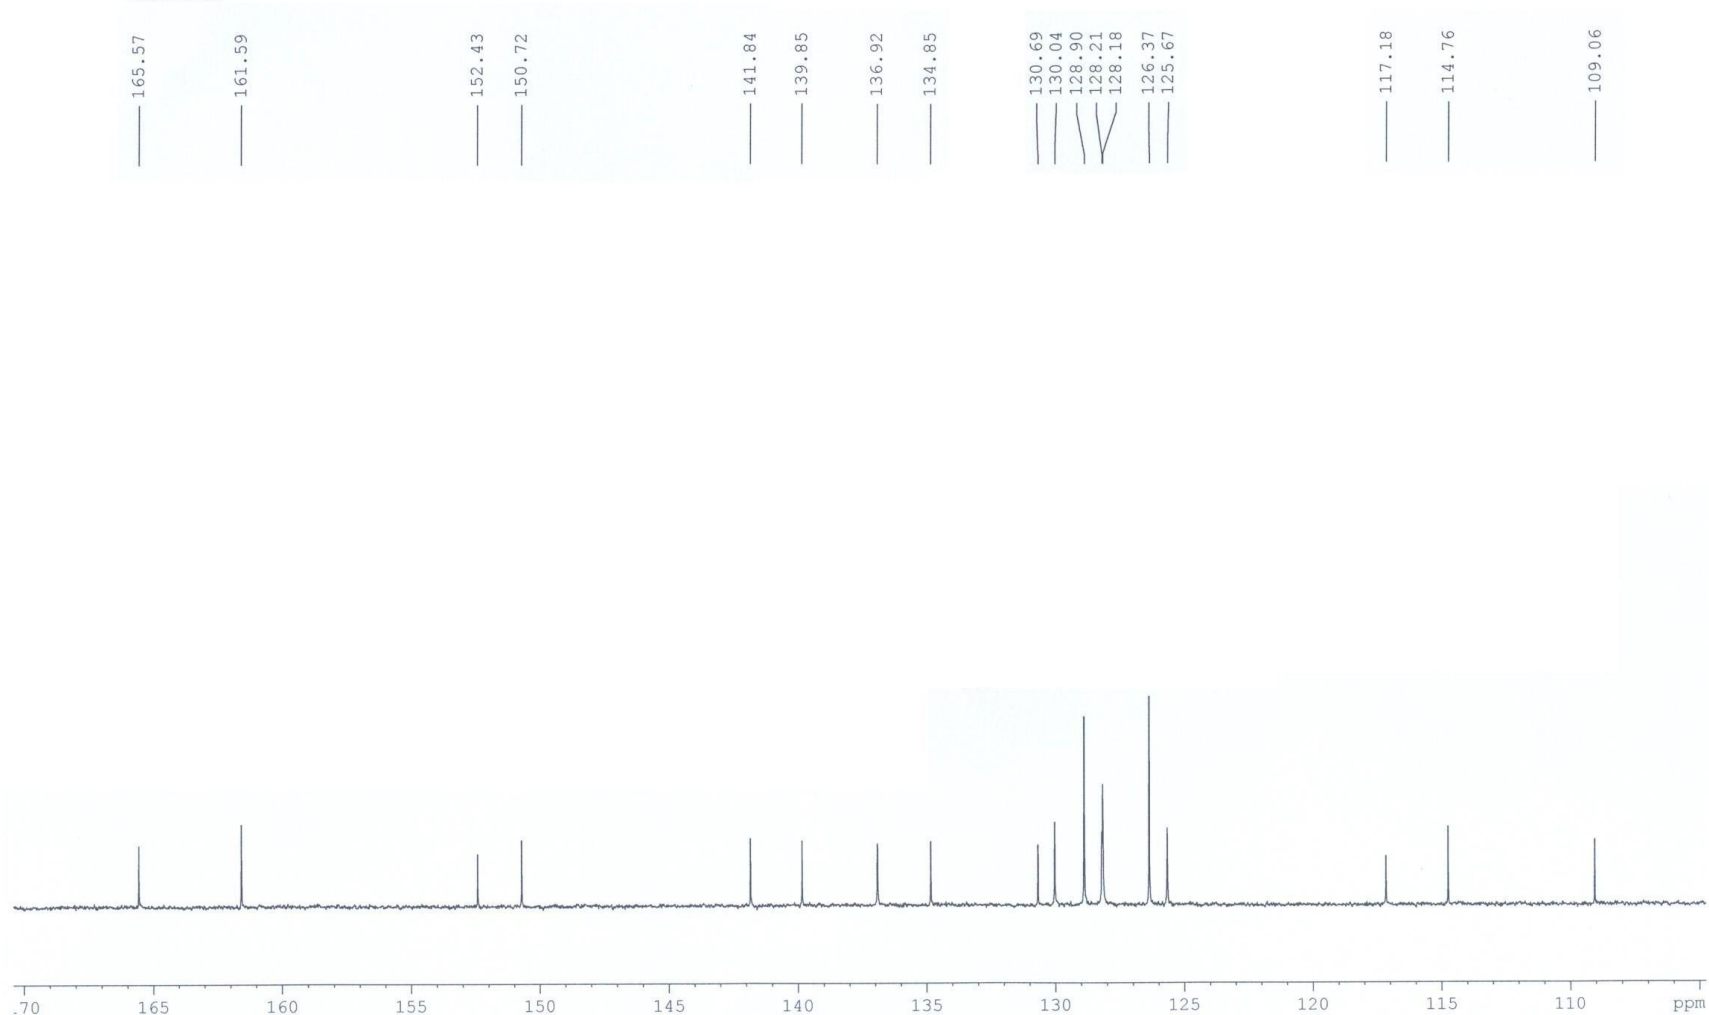

Compound 12L

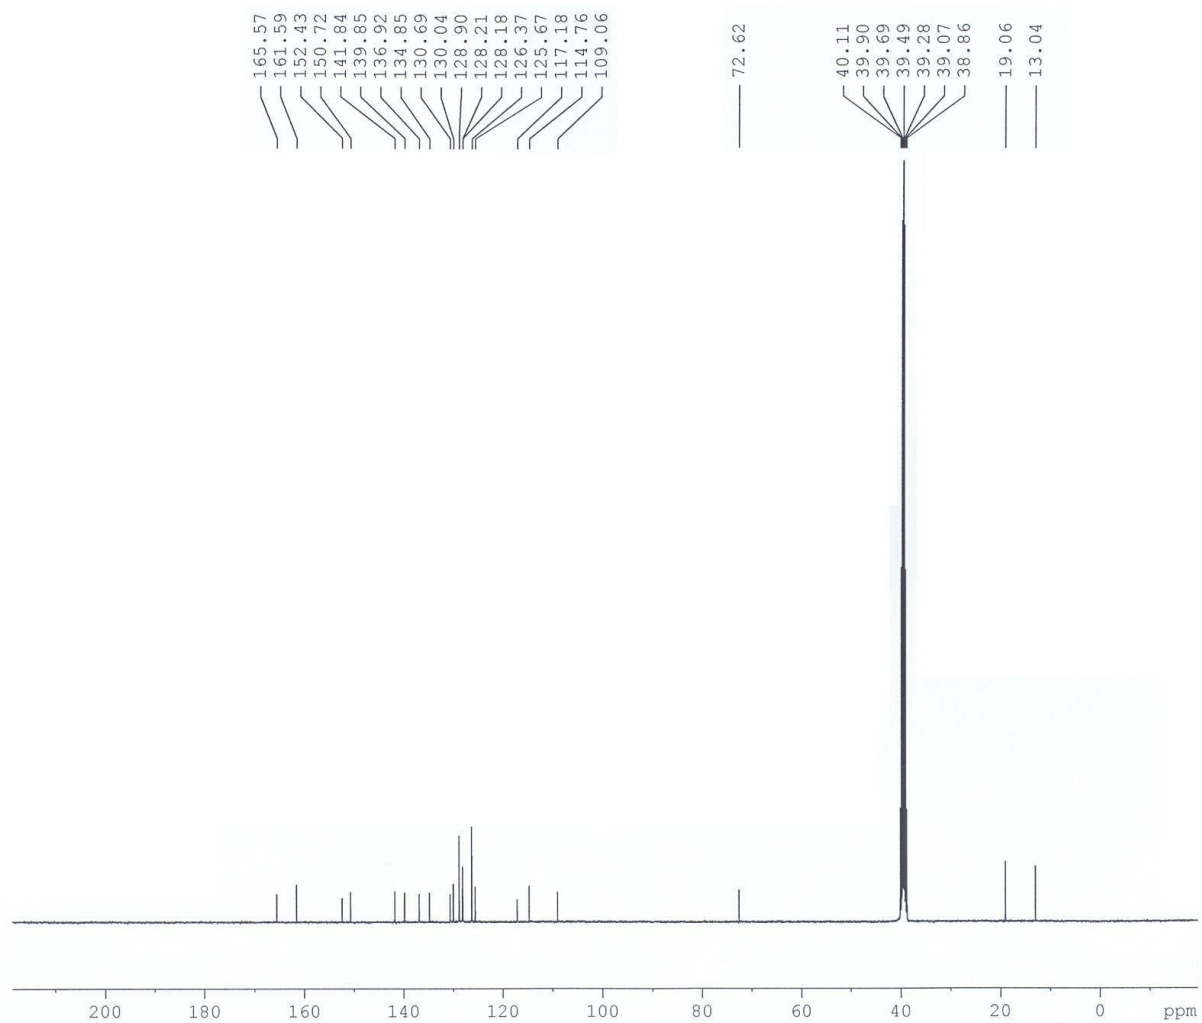

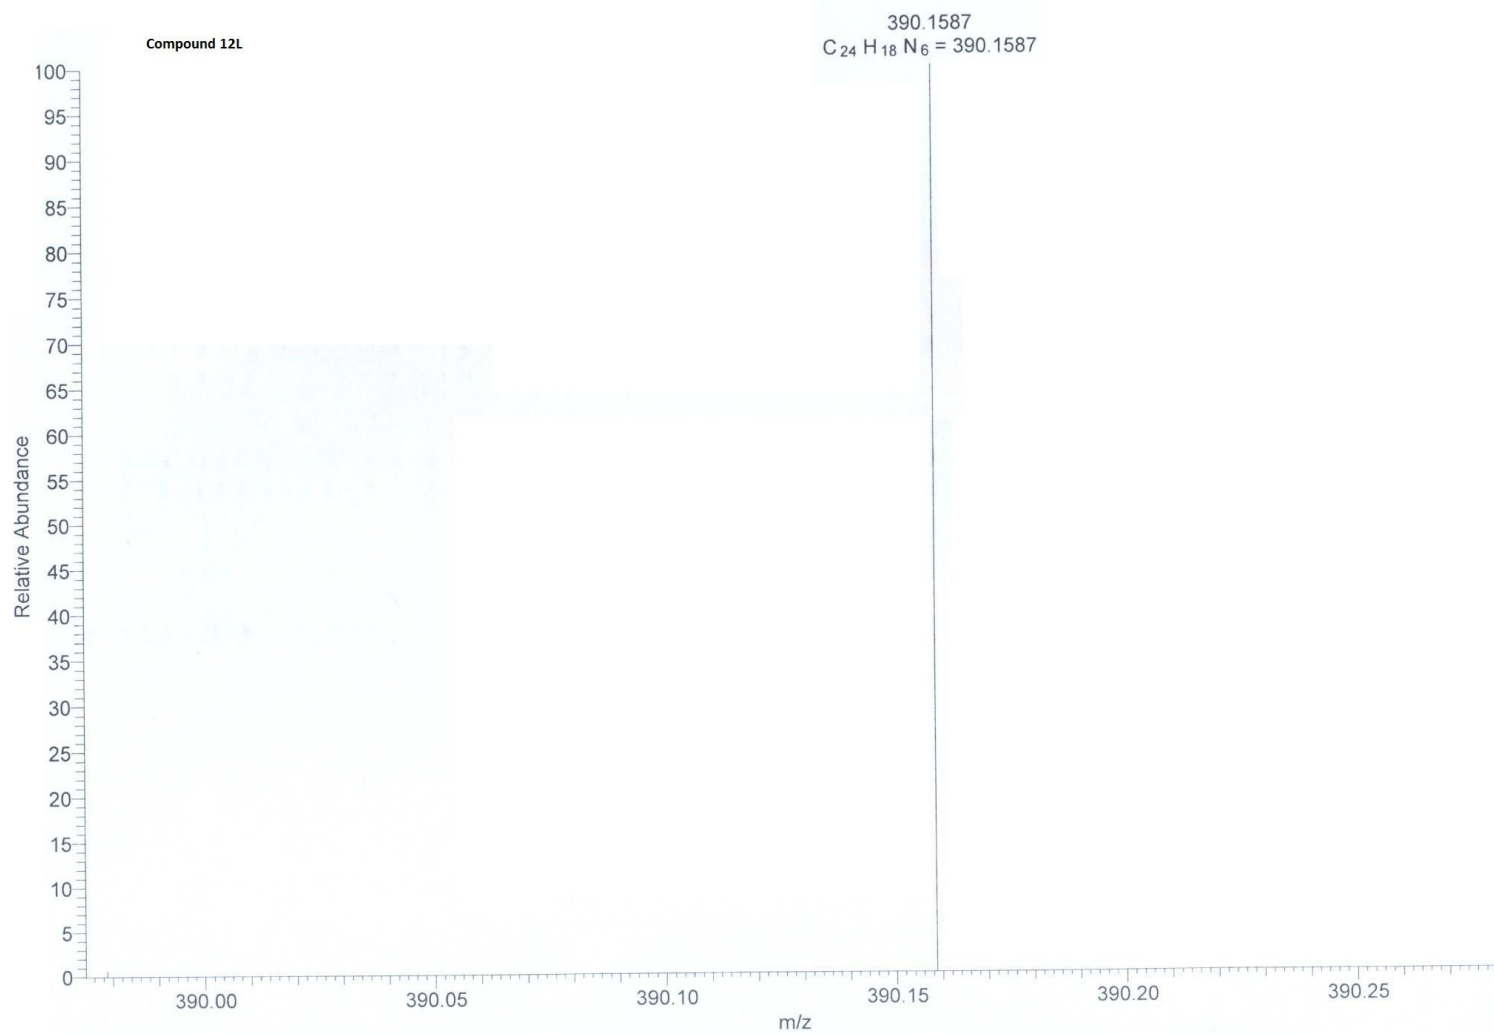

Compound 12L

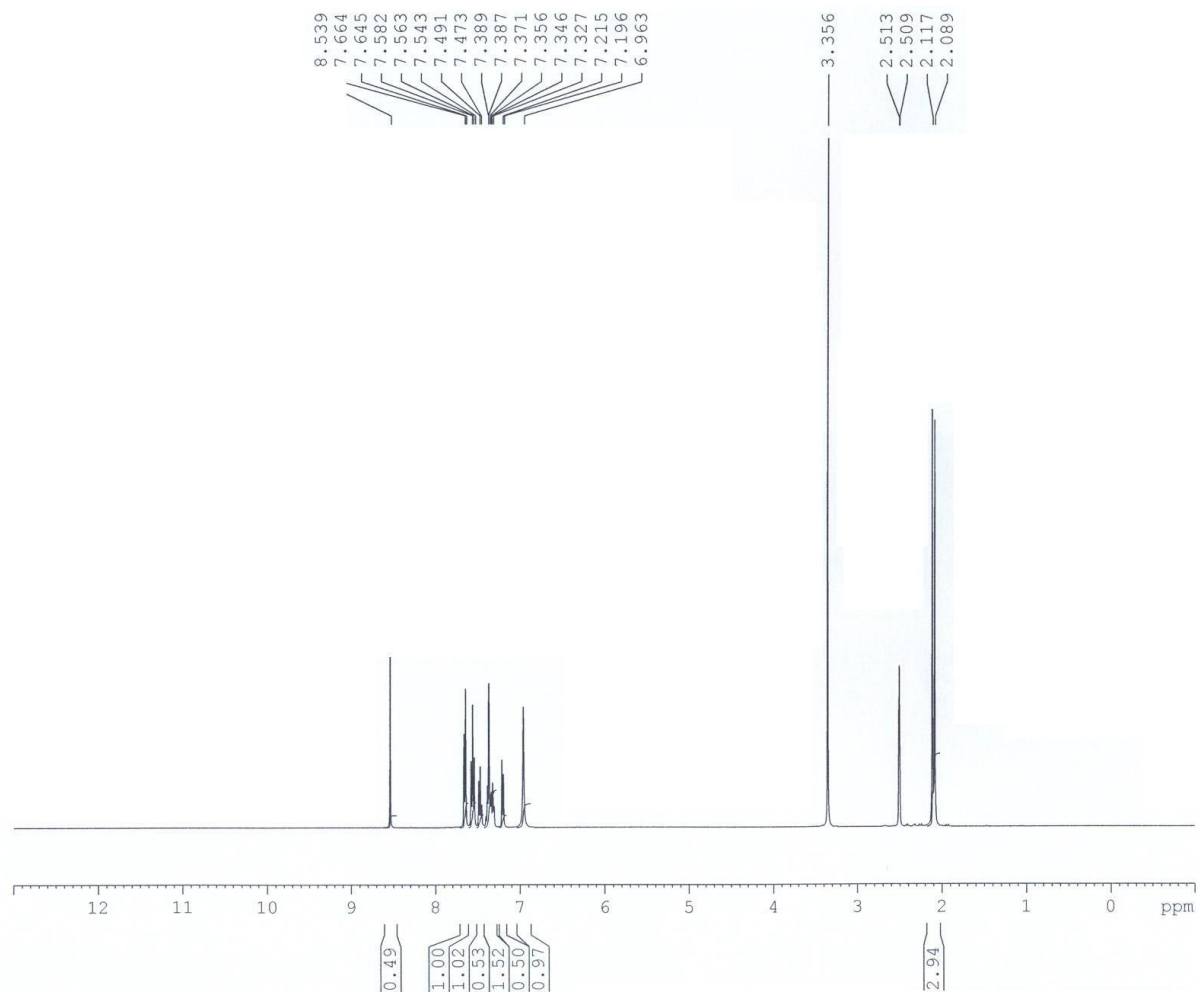



Compound 12L

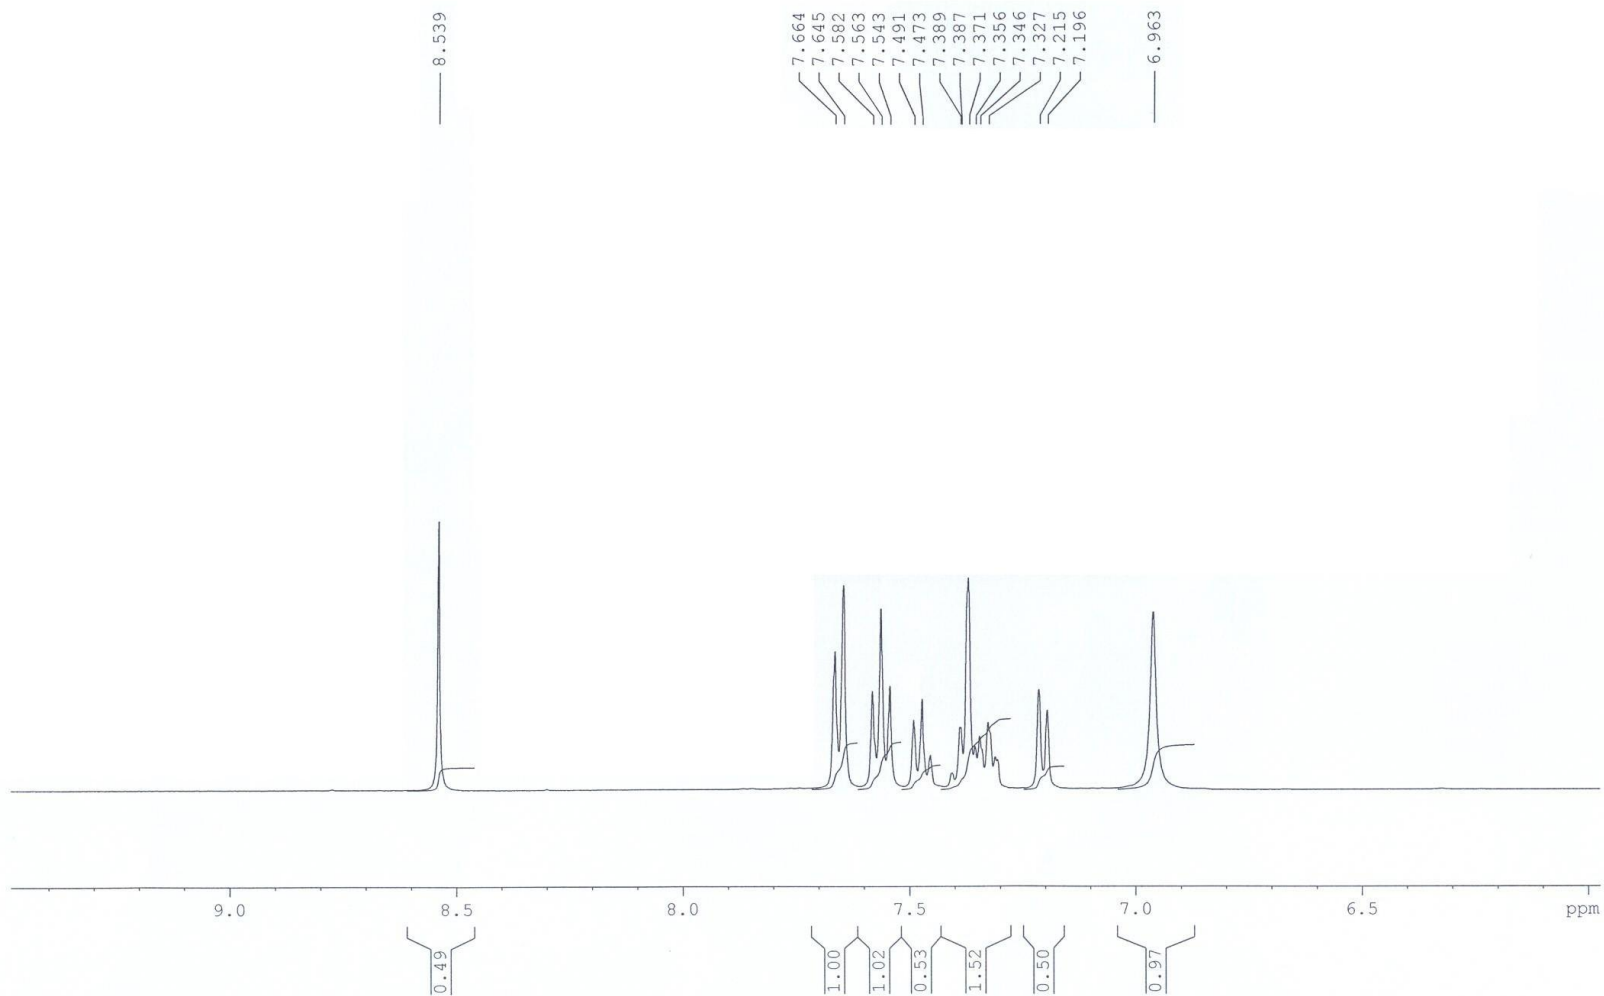

Compound 12m

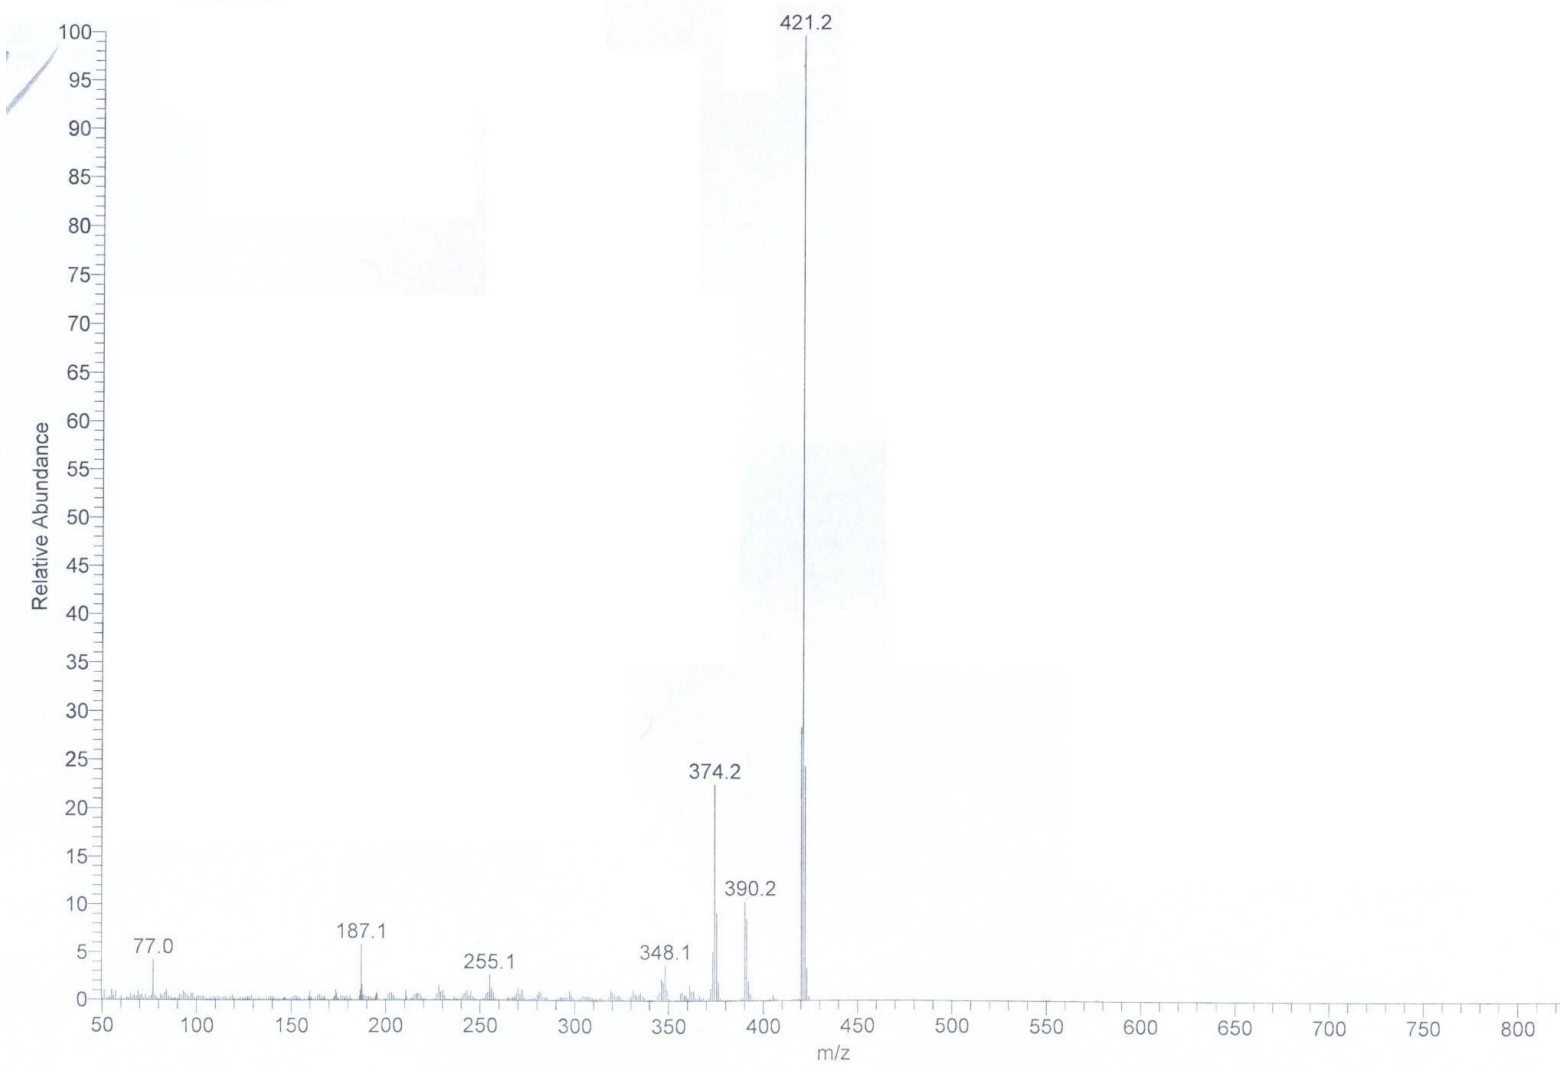

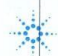

Agilent Technologies

Compound 12m

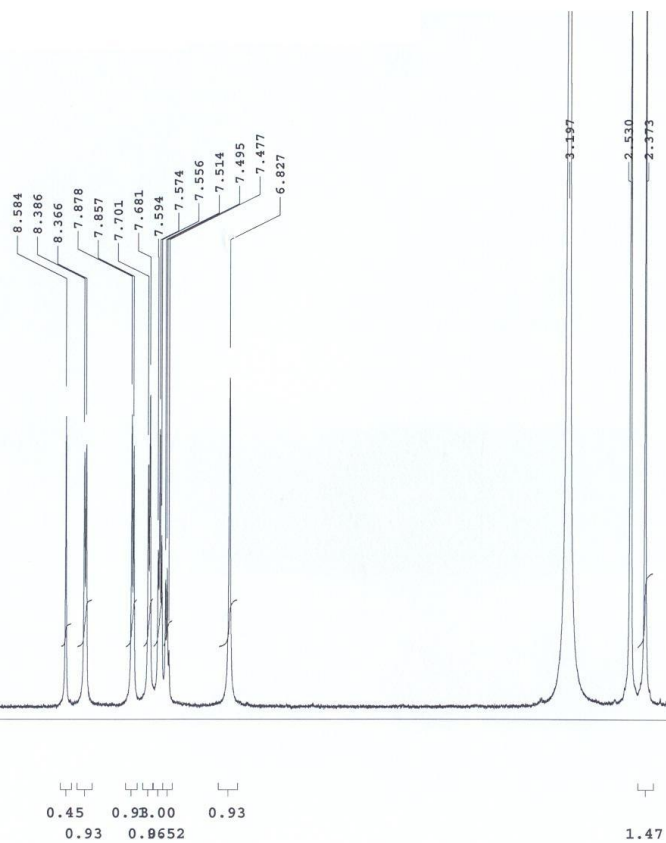

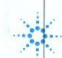

Agilent Technologies

Compound 12m

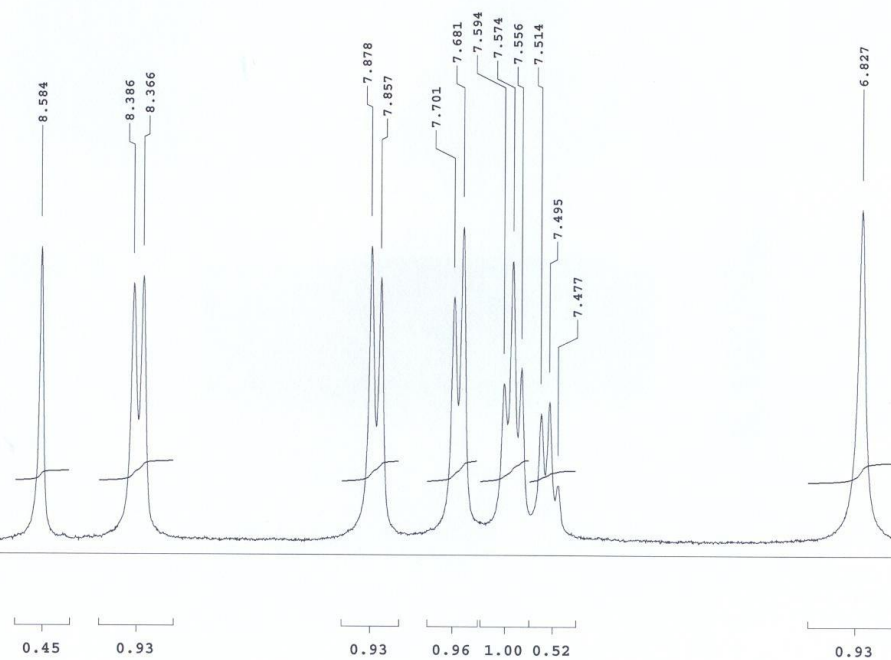

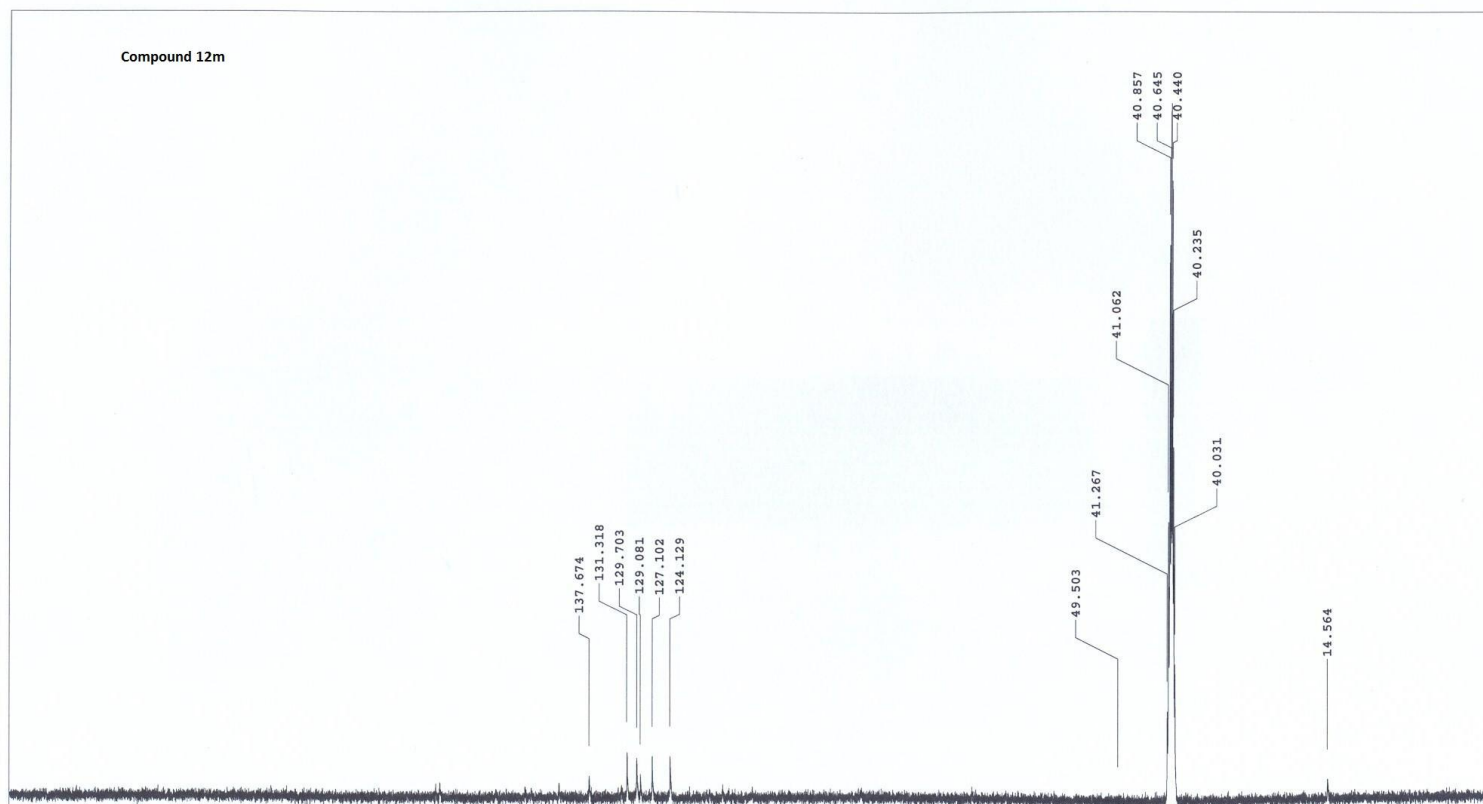

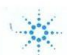

Agilent Technologies

Compound 12m

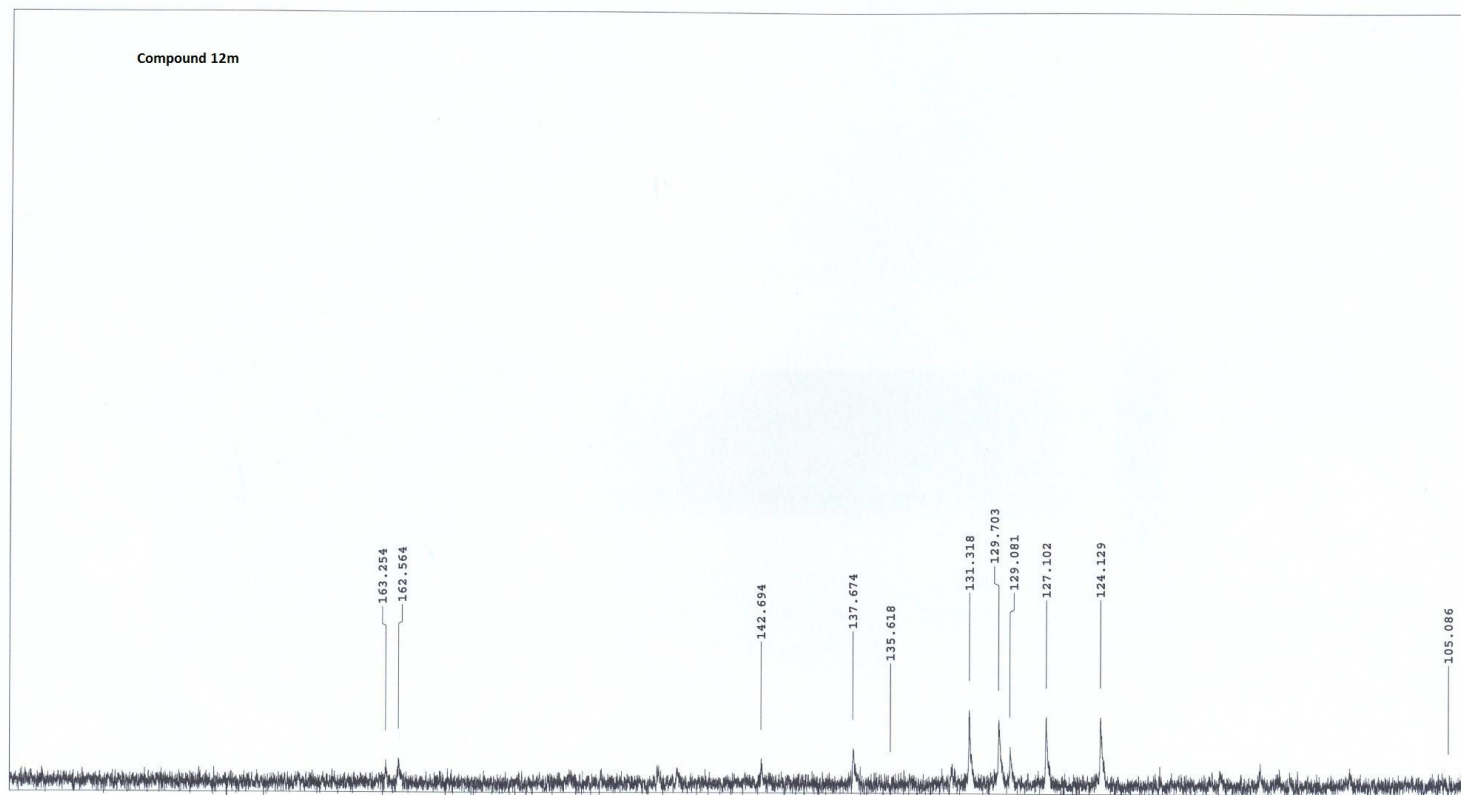

Compound 12m

421.1282  
 $C_{24}H_{21}O_7 = 421.1282$

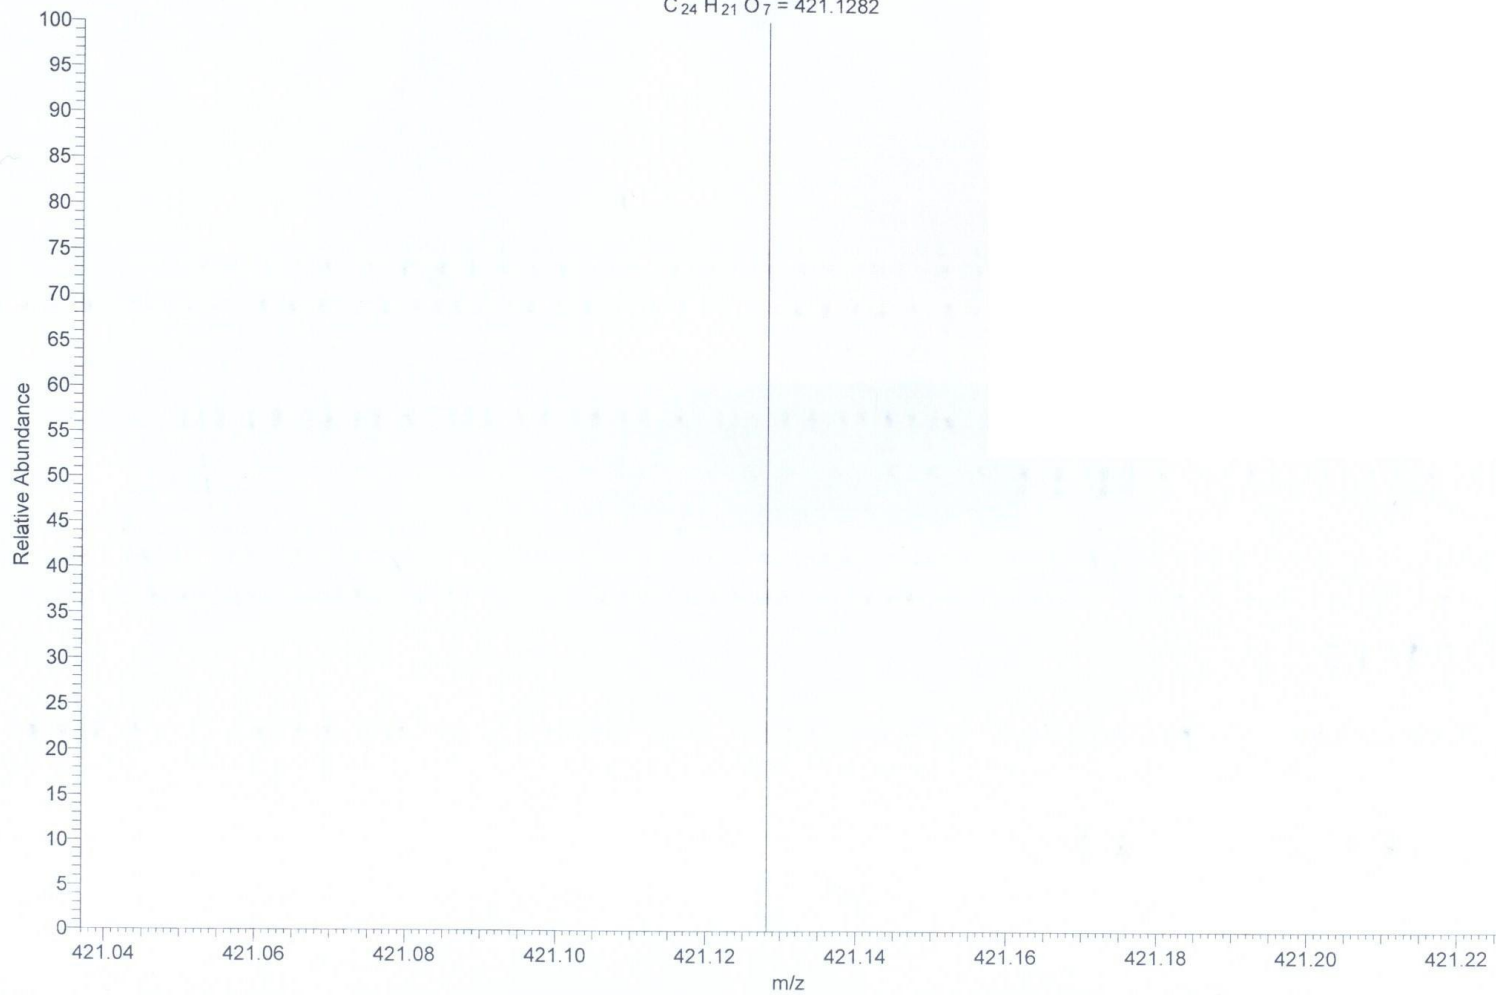

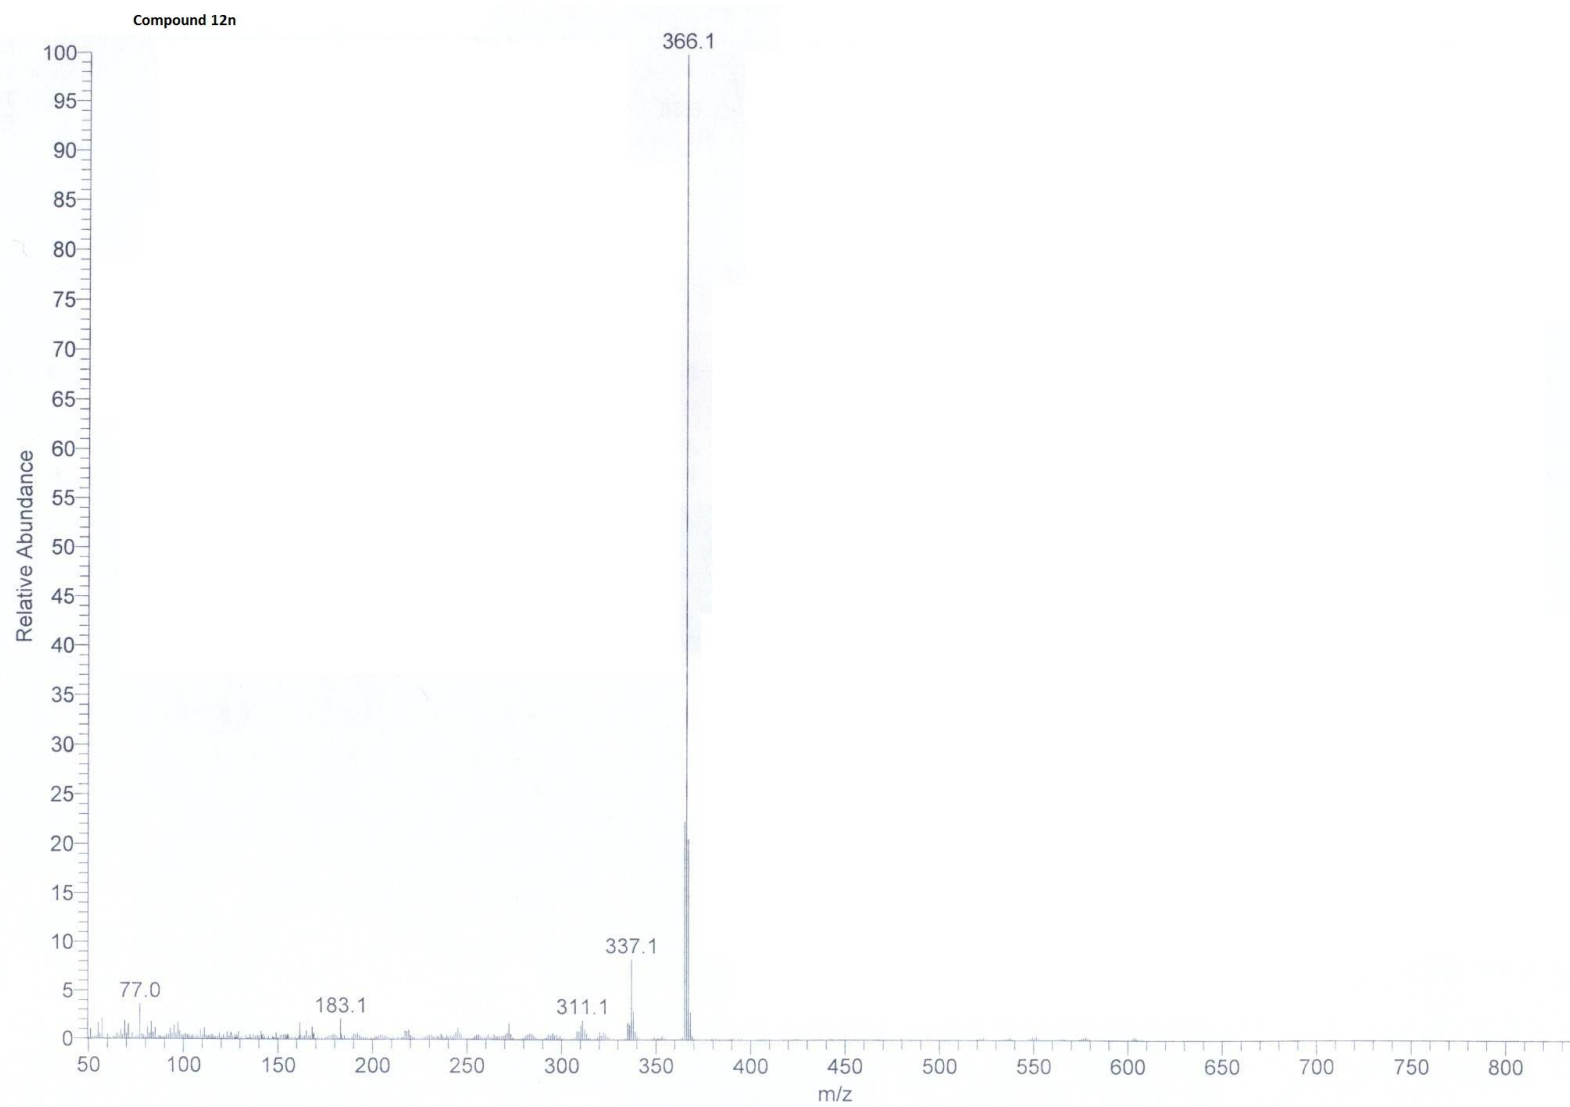



Compound 12n

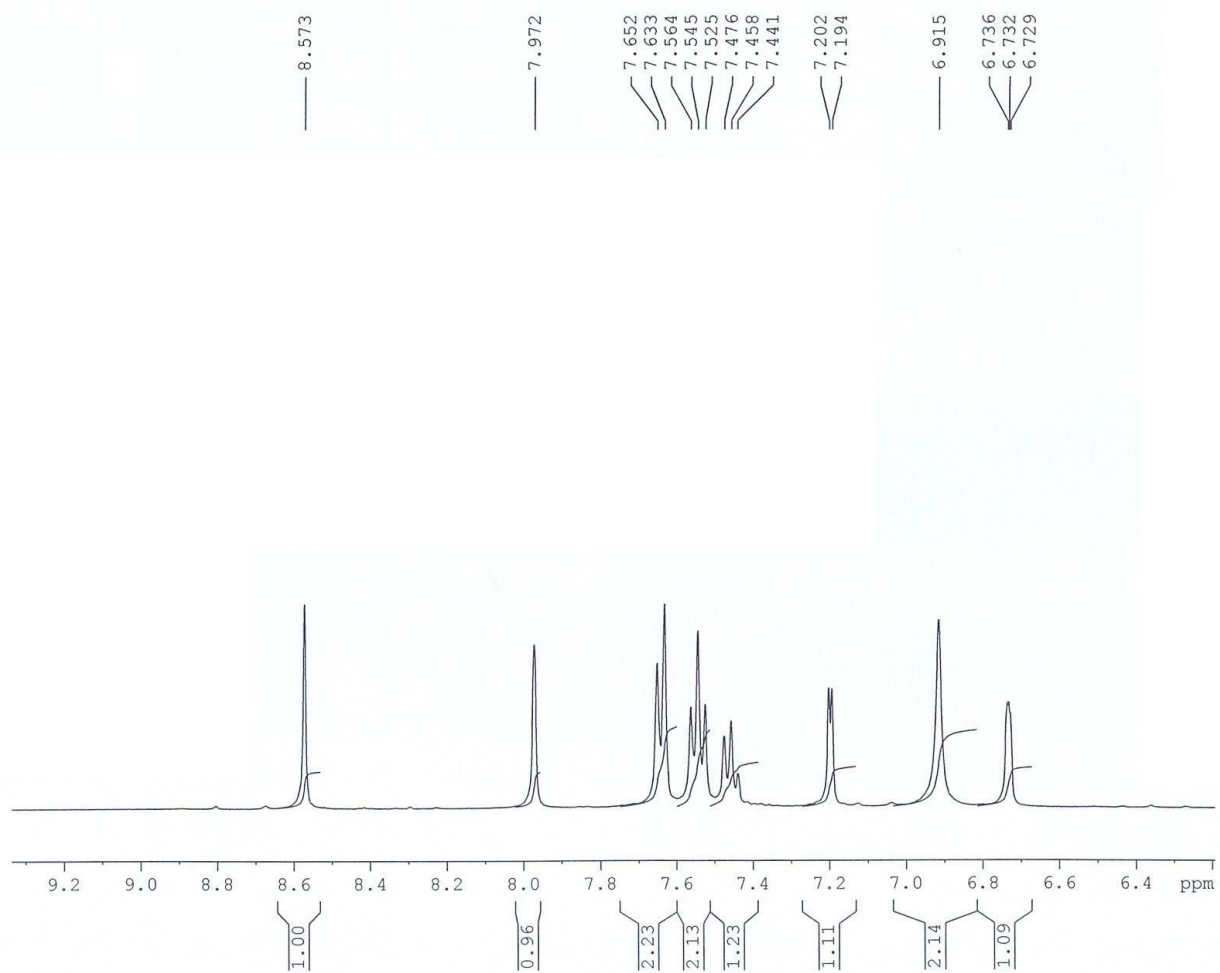

Compound 12n

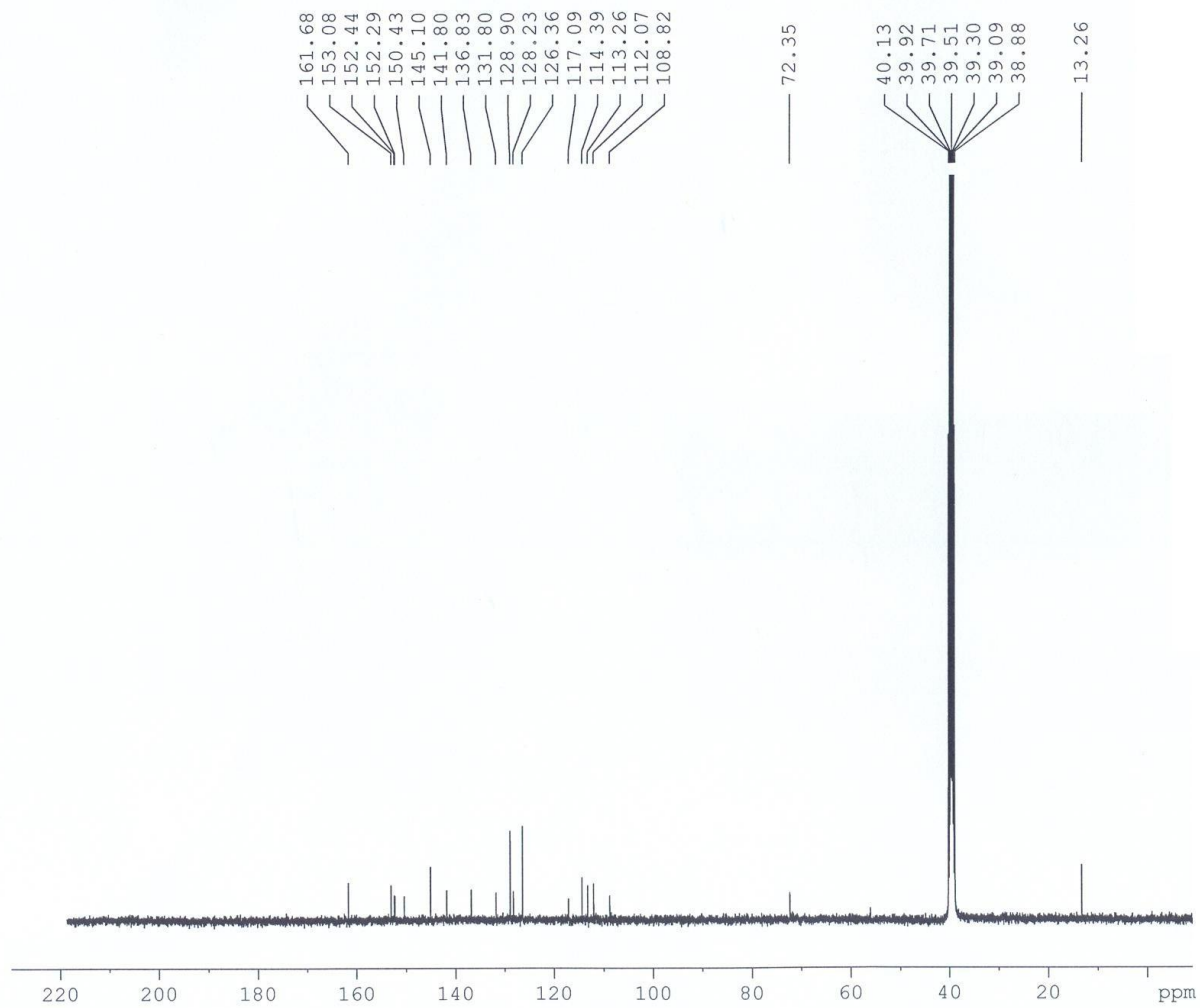

Compound 12n

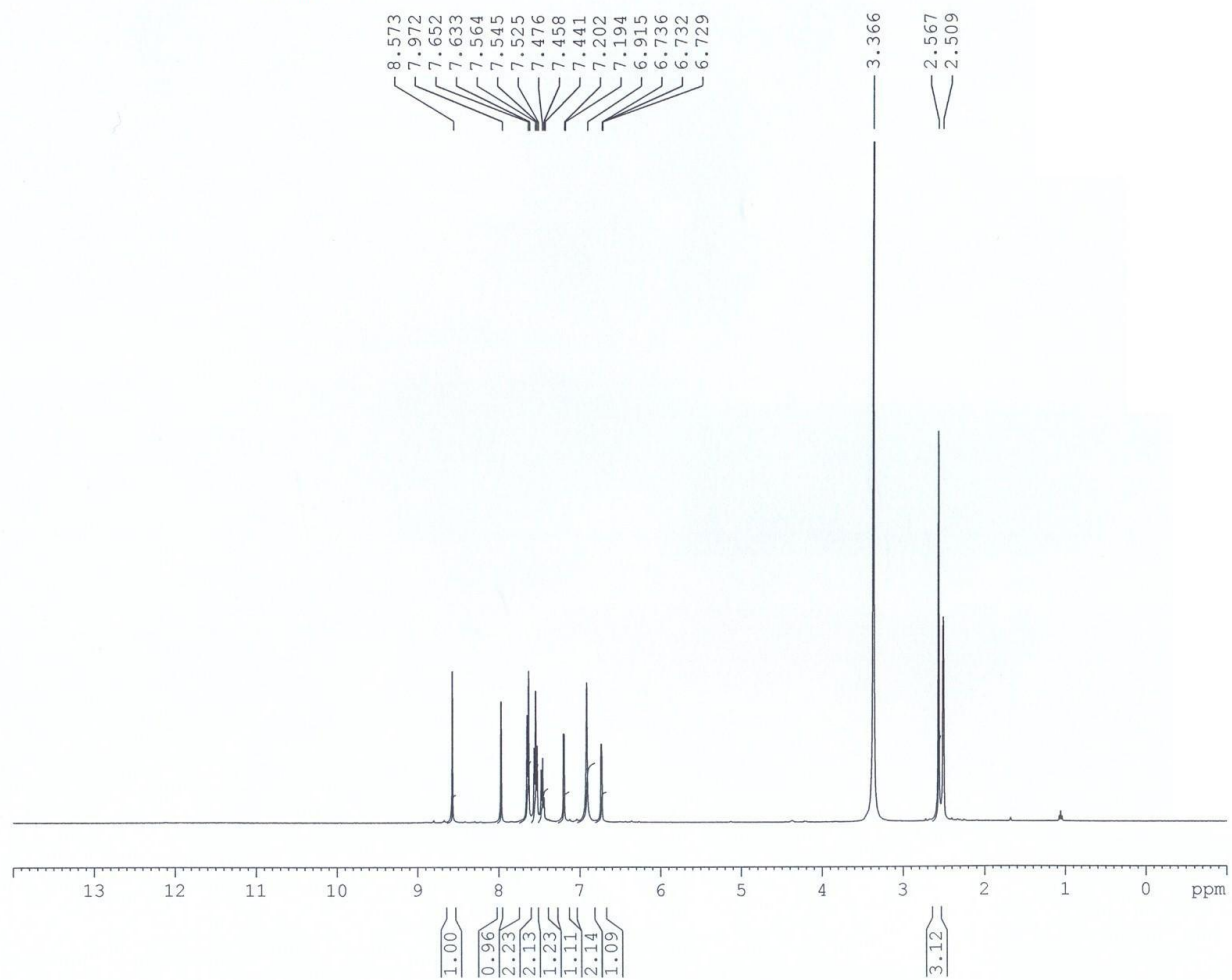

Compound 12n

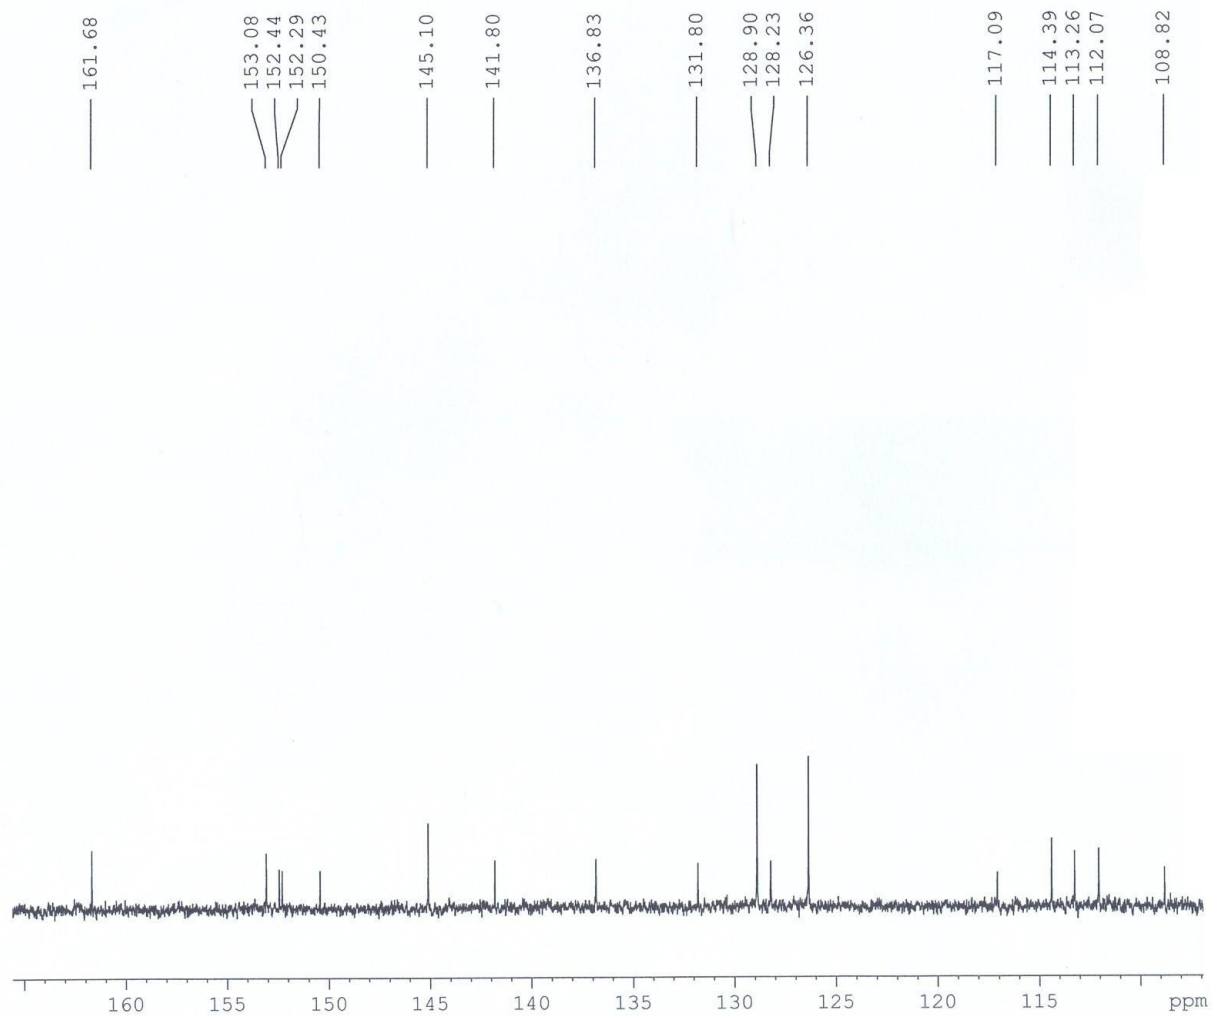

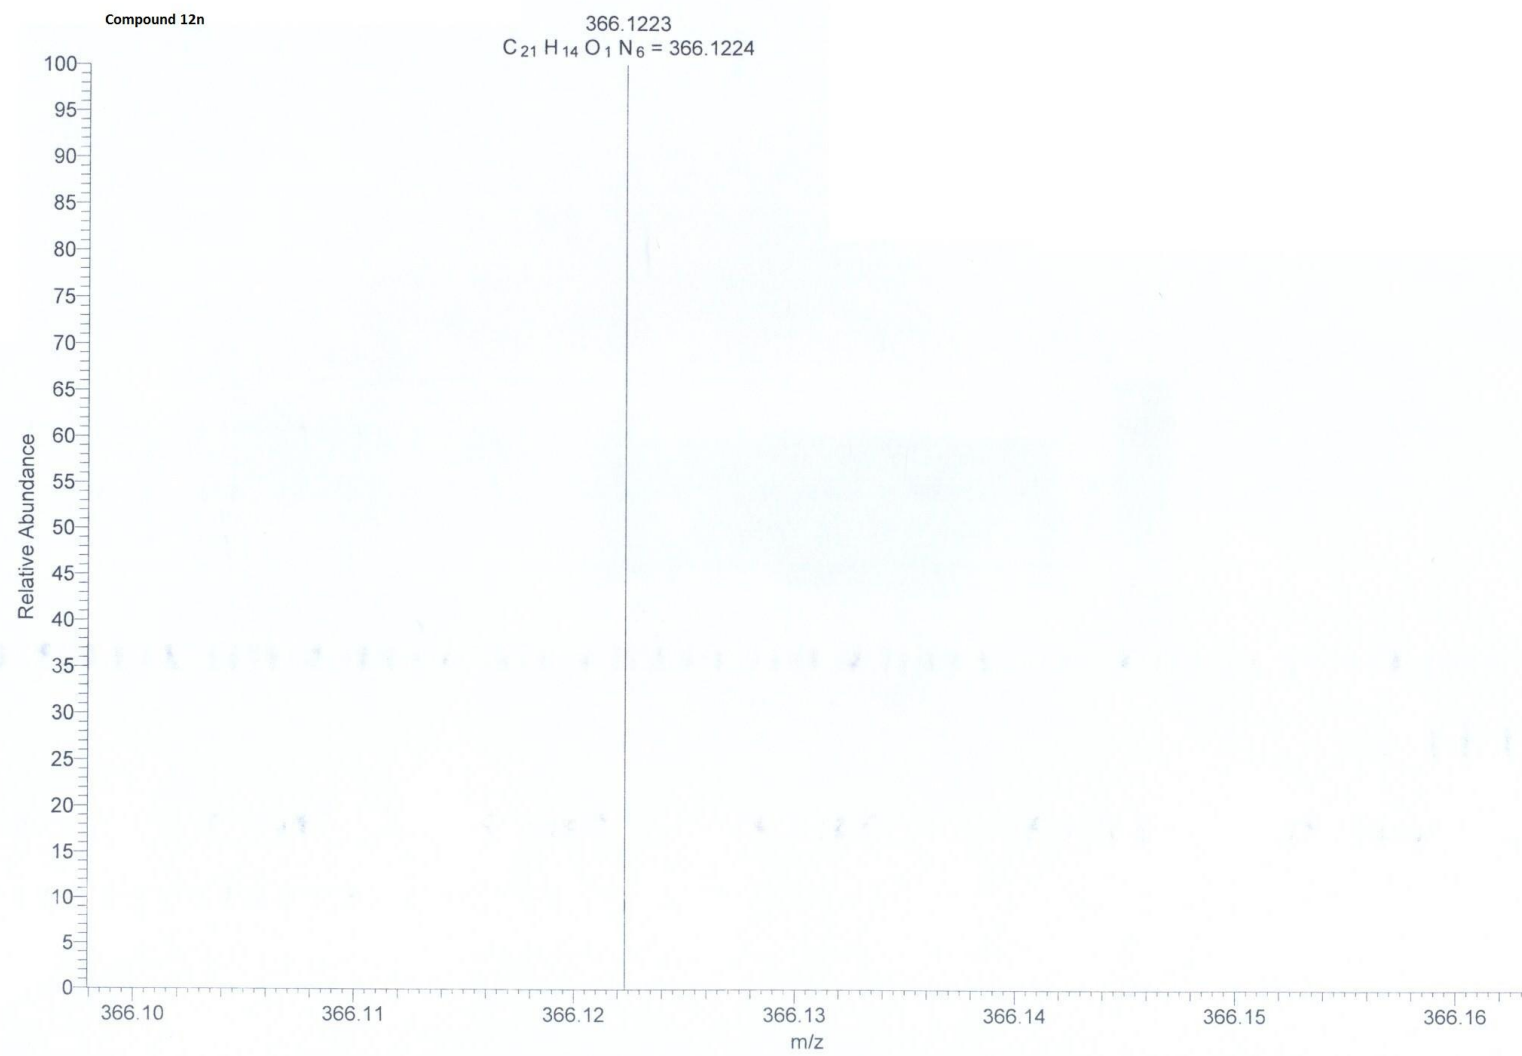

Supplement: s1 [file s1]
